# Supplementary material
Source: MDPI journal article supplement (https://www.mdpi.com/2624-7402/6/1/36)
Supplement: s1 [file s1]

Input Data

|                    | Data                                       | Range    |
|--------------------|--------------------------------------------|----------|
| Dependent Variable | [Book1]Sheet1!F"Hardness Shore A"          | [1*:81*] |
| Factor A           | [Book1]Sheet1!B"Final density kg/dm3"      | [1*:81*] |
| Factor B           | [Book1]Sheet1!D"Thickness of the mat (mm)" | [1*:81*] |

Descriptive Statistics

Final density kg/dm3

|      | N  | Mean     | SD      | SEM     | Variance | Missing | NonMissing |
|------|----|----------|---------|---------|----------|---------|------------|
| 0,8  | 54 | 39,85759 | 4,64532 | 0,63215 | 21,57898 | 0       | 54         |
| 0,85 | 9  | 40,10667 | 7,34734 | 2,44911 | 53,9834  | 0       | 9          |
| 0,9  | 18 | 42,78722 | 1,92715 | 0,45423 | 3,7139   | 0       | 18         |

Thickness of the mat (mm)

|    | N  | Mean     | SD      | SEM     | Variance | Missing | NonMissing |
|----|----|----------|---------|---------|----------|---------|------------|
| 30 | 54 | 41,06981 | 5,15731 | 0,70182 | 26,59786 | 0       | 54         |
| 20 | 9  | 36,15778 | 3,64422 | 1,21474 | 13,28037 | 0       | 9          |
| 25 | 18 | 41,125   | 1,65109 | 0,38917 | 2,72611  | 0       | 18         |

Overall

|  | N  | Mean    | SD      | SEM     | Variance | Missing | NonMissing |
|--|----|---------|---------|---------|----------|---------|------------|
|  | 81 | 40,5363 | 4,68565 | 0,52063 | 21,95531 | 0       | 81         |

ANOVA

Overall ANOVA

|                           | DF | Sum of Squares | Mean Square | F Value | P Value |
|---------------------------|----|----------------|-------------|---------|---------|
| Final density kg/dm3      | 2  | 80,33614       | 40,16807    | 2,05999 | 0,13451 |
| Thickness of the mat (mm) | 2  | 156,75219      | 78,37609    | 4,01946 | 0,02191 |
| Model                     | 4  | 274,48793      | 68,62198    | 3,51923 | 0,01089 |
| Error                     | 76 | 1481,93716     | 19,49917    |         |         |
| Corrected Total           | 80 | 1756,42509     |             |         |         |

At the 0.05 level, the population means of Final density kg/dm3 are not significantly different.  
At the 0.05 level, the population means of Thickness of the mat (mm) are significantly different.

Means Comparisons

Tukey Test

Final density kg/dm3

|          | MeanDiff | SEM     | q Value | Prob    | Alpha | Sig | LCL      | UCL     |
|----------|----------|---------|---------|---------|-------|-----|----------|---------|
| 0,85 0,8 | 0,24907  | 1,58986 | 0,22156 | 0,98656 | 0,05  | 0   | -3,55147 | 4,04961 |
| 0,9 0,8  | 2,92963  | 1,20182 | 3,44736 | 0,04463 | 0,05  | 1   | 0,05669  | 5,80257 |
| 0,9 0,85 | 2,68056  | 1,80274 | 2,10285 | 0,30286 | 0,05  | 0   | -1,62885 | 6,98996 |

Thickness of the mat (mm)

|       | MeanDiff | SEM     | q Value | Prob    | Alpha | Sig | LCL      | UCL     |
|-------|----------|---------|---------|---------|-------|-----|----------|---------|
| 20 30 | -4,91204 | 1,58986 | 4,36935 | 0,0078  | 0,05  | 1   | -8,71258 | -1,1115 |
| 25 30 | 0,05519  | 1,20182 | 0,06494 | 0,99884 | 0,05  | 0   | -2,81775 | 2,92812 |
| 25 20 | 4,96722  | 1,80274 | 3,89669 | 0,01984 | 0,05  | 1   | 0,65782  | 9,27663 |

Final density kg/dm3's Grouping Letters Table

|      | Mean     | Groups |
|------|----------|--------|
| 0,9  | 42,78722 | A      |
| 0,85 | 40,10667 | A B    |
| 0,8  | 39,85759 | B      |

Means that do not share a letter are significantly different.

Thickness of the mat (mm)'s Grouping Letters Table

|    | Mean     | Groups |
|----|----------|--------|
| 25 | 41,125   | A      |
| 30 | 41,06981 | A      |
| 20 | 36,15778 | B      |

Means that do not share a letter are significantly different.

Sig equals 1 indicates that the difference of the means is significant at the 0,05 level.  
Sig equals 0 indicates that the difference of the means is not significant at the 0,05 level.
