# Supplementary material
Source: MDPI journal article supplement (https://www.mdpi.com/2624-7402/6/1/36)
Supplement: s1 [file s1]

# BOVINI

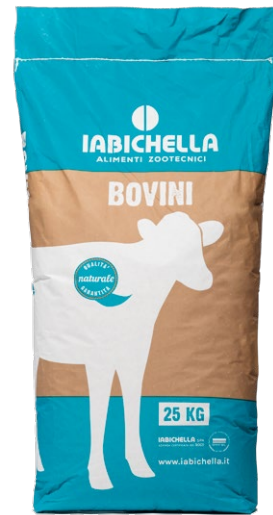

[www.iabichella.it](http://www.iabichella.it)

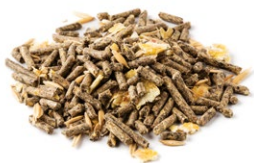

**COD M10**

## SVEZZA PLUS I PERIODO

**LAVORAZIONE:** Pellet + Focchi

### COMPOSIZIONE:

focchi di mais, granturco, avena, farina di estrazione di girasole, cruschetto di frumento, polpa di barbabietola, favino, farina di estrazione di soia tostata\*, baccelli di carruba essiccati, soia tostata int.\*, melasse di canna, carbonato di calcio, farina di erba, olio vegetale\*, cloruro di sodio

### TENORI ANALITICI:

|                     |         |
|---------------------|---------|
| Proteina grezza     | 15,50 % |
| Cellulosa grezza    | 10,00 % |
| Ceneri grezze       | 6,00 %  |
| Oli e grassi grezzi | 3,60 %  |
| Sodio               | 0,18 %  |

### INTEGRAZIONE:

#### Vitamine, pro-vitamine e sost ad effetto analogo:

E 672 Vitamina A UI 14.000,0 • E671 Vitamina D3 UI 2.100,0  
• Niacina (3a314) mg 180,6 • 3a700 Vit.E (tutto rac-a-tocoferil acetato) mg 35,0 • Vitamina B2 (Riboflavina) mg 4,5  
• Vitamina B1 (Tiamina monoi.) mg 2,0

#### Composti di oligoelementi:

E5 Solfato manganoso, monoidrat mg 136,5 • E1 Carbonato ferroso mg 96,5 • E6 Ossido di zinco mg 43,4 • E4 Solfato rameico pentaidrato mg 42,1 • E6 Solfato di zinco, monoidrato mg 31,8 • E1 Solfato ferroso, monoidrato mg 28,3 • E2 Iodato di calcio anidro mg 1,6 • E8 Selenito di sodio mg 0,5

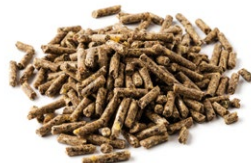

**COD M5**

## SVEZZA PLUS II PERIODO

**LAVORAZIONE:** Pellet

### COMPOSIZIONE:

granturco, cruschetto di frumento, farina di estrazione di girasole, polpa di barbabietola, farina di estrazione di soia tostata\*, baccelli di carruba essiccati, farinaccio di frumento, melasse di canna, carbonato di calcio, farina seme di carruba dec., cloruro di sodio, bicarbonato di sodio

### TENORI ANALITICI:

|                     |         |
|---------------------|---------|
| Proteina grezza     | 16,00 % |
| Cellulosa grezza    | 9,50 %  |
| Ceneri grezze       | 6,70 %  |
| Oli e grassi grezzi | 3,00 %  |
| Sodio               | 0,25 %  |

### INTEGRAZIONE:

#### Vitamine, pro-vitamine e sost ad effetto analogo:

E 672 Vitamina A UI 14.000,0 • E671 Vitamina D3 UI 2.100,0  
• 3a700 Vit.E (tutto rac-a-tocoferil acetato) mg 35,0

#### Composti di oligoelementi:

E5 Solfato manganoso, monoidrat mg 214,1 • E1 Carbonato ferroso mg 157,3 • E1 Solfato ferroso, monoidrato mg 69,3  
• E4 Solfato rameico pentaidrato mg 59,0 • E6 Ossido di zinco mg 43,4 • E6 Solfato di zinco, monoidrato mg 2,2 • E8 Selenito di sodio mg 0,9 • E2 Iodato di calcio anidro mg 0,6

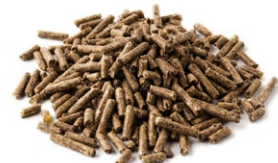

**COD M32**

## MANZE ACCRESCIMENTO

**LAVORAZIONE:** Pellet

### COMPOSIZIONE:

farina di estrazione di soia tostata\*, granturco, farinaccio di frumento, farina di estrazione di girasole, cruschetto di frumento, farina seme di carruba dec., melasse di canna, carbonato di calcio, bicarbonato di sodio, cloruro di sodio

### TENORI ANALITICI:

|                     |         |
|---------------------|---------|
| Proteina grezza     | 24,00 % |
| Ceneri grezze       | 7,50 %  |
| Cellulosa grezza    | 7,50 %  |
| Oli e grassi grezzi | 3,00 %  |
| Sodio               | 0,30 %  |

### INTEGRAZIONE:

#### Vitamine, pro-vitamine e sost ad effetto analogo:

E 672 Vitamina A UI 14.000,0 • E671 Vitamina D3 UI 2.100,0  
• Niacina (3a314) mg 180,6 • 3a700 Vit.E (tutto rac-a-tocoferil acetato) mg 35,0 • Vitamina B2 (Riboflavina) mg 4,5  
• Vitamina B1 (Tiamina monoi.) mg 2,0

#### Composti di oligoelementi:

E5 Solfato manganoso, monoidrat mg 292,4 • E1 Carbonato ferroso mg 206,8 • E6 Ossido di zinco mg 93,0 • E4 Solfato rameico pentaidrato mg 90,2 • E6 Solfato di zinco, monoidrato mg 68,2 • E1 Solfato ferroso, monoidrato mg 60,6 • E2 Iodato di calcio anidro mg 3,4 • E8 Selenito di sodio mg 1,1
