# Supplementary material
Source: MDPI journal article supplement (https://www.mdpi.com/2624-7402/6/1/36)
Supplement: s1 [file s1]

N°5

DICEMBRE  
2016

# Noi

## COOPERATIVE

NOTIZIARIO  
2.0

*Giampietro Dossena*

PROGRAMMA  
2017 GRUPPO  
GIOVANI

*Tommaso Pucci  
Sonia Rumi*

IL PASSAGGIO  
GENERAZIONALE  
IN AZIENDA

*Marco Treccani*

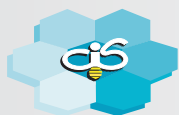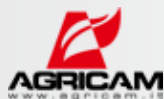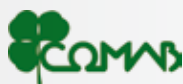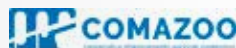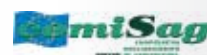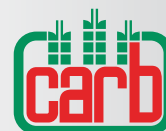

# Sommario

n°5  
DICEMBRE  
2016  
ANNO 5

## EDITORE

Cis Consorzio  
Intercooperativo Servizi  
Via Santellone, 37  
Montichiari (BS)

## DIRETTORE RESPONSABILE

Marco Ottolini

## REDAZIONE

Marco Baresi  
Ornella Maffi  
Simona Bonfadelli  
Raffaella Scattolon  
Cristian Zappettini  
Tommaso Pucci  
Maurizio Cartapati  
Sonia Rumi  
Giampietro Dossena  
Silvia Saiani

## HANNO COLLABORATO:

Fabio Chiarini, Massimo Venturi,  
Marco Menni, Claudio Brunelli,  
Maurizio Sabbadini, Paolo Malizia,  
Davide Floris, Maurizio Zani,  
Marco Treccani

## PROGETTO GRAFICO

linoolmostudio.it

## STAMPA

Tipopennati S.r.l. - Montichiari (BS)

## ISCRIZ. TRIBUNALE DI BRESCIA

N° 31/2002

### *cisiamo*

Caro Socio  
di **Marco Baresi** 3

Notiziario 2.0  
di **Giampietro Dossena** 4

### *novità*

Sperimentazioni di tecniche  
culturali innovative  
di **Simona Bonfadelli** 6

### *gruppo giovani*

C'eravamo lasciati con un  
"Arrivederci a dopo l'Estate!"  
di **Tommaso Pucci**  
e **Sonia Rumi** 8

### *la parola al socio*

Scatti di scena dalla Fiera  
di Cremona 11

Open Day per il giardinaggio  
di **Simona Bonfadelli**  
e **Fabio Chiarini** 12

Siloking apre le porte  
ai soci Cis  
di **Cristian Zappettini** 13

Alla scoperta della Sicilia  
di **Massimo Venturi** 14

### *Confcooperative Brescia*

La cooperazione  
nei territori  
di **Marco Menni** 16

### *Il tecnico informa*

Principali modifiche fiscali  
dell'anno 2016  
di **Marco Menni** 17

Mais da granella e trinciato:  
le nostre prove  
di **Sabbadini Maurizio** 18

La fase di ristallo  
nell'allevamento del bovino  
da carne  
di **Maurizio Cartapati**  
e **Paolo Malizia** 21

Corretta somministrazione  
del latte in polvere  
di **Sonia Rumi** 24

Pneumatici invernali: non  
sottovalutare il freddo  
di **Davide Floris** 26

Bilancio di fine anno  
di **Maurizio Zani** 28

### *fuori dal CIS*

Il passaggio generazionale  
in azienda  
di **Marco Treccani** 42

## Caro Socio,

il nostro territorio ha conosciuto un eccezionale sviluppo cooperativo, generato dalla capacità di aggregazione e dalla promozione delle competenze presenti nell' economia agricola tradizionale, condotto da una generazione di agricoltori che hanno saputo cogliere il nuovo e radicarlo nelle esperienze già presenti.

È proprio da queste esperienze prende le mosse il momento assembleare previsto nella festa di Natale del prossimo 17 dicembre: ascoltare la voce dei consorzi e delle cooperative presenti sul territorio che nel corso degli anni si sono sviluppate e hanno risposto ai bisogni, espressi e impliciti, in modo sempre più professionale. Ma è importante che il territorio sia considerato non più secondo rigidi ambiti amministrativi e burocratici, ma secondo più coerenti ambiti sociali ed economici.

L'attività delle cooperative, oltre ad avere un contenuto economico rilevante per il territorio, ha un peso ancora maggiore nella implementazione del capitale sociale e umano, in quanto la natura collettiva ed intergenerazionale le spinge ad occuparsi dei problemi della comunità, instaurando un particolare rapporto con i soggetti che in essa agiscono. Le questioni della perdita di coesione della società per effetto dell'affermarsi di logiche individualistiche trova nella cooperazione uno strumento di contrasto e di recupero perché la cooperazione è la forza economica che interiorizza il valore dell'identità locale.

Per sviluppare pienamente le potenzialità delle imprese cooperative a favore del territorio occorre, quindi, costruire alleanze con le istituzioni, con le altre forme di impresa, con gli altri soggetti sociali intermedi.

Senza entrare nella storia della famosa frase americana "I care" ovvero "ho a cuore, ci tengo, mi interessa", mi sembra che queste due semplici parole possano riassumere il punto d'incontro tra le esigenze dei soci delle cooperative, del-

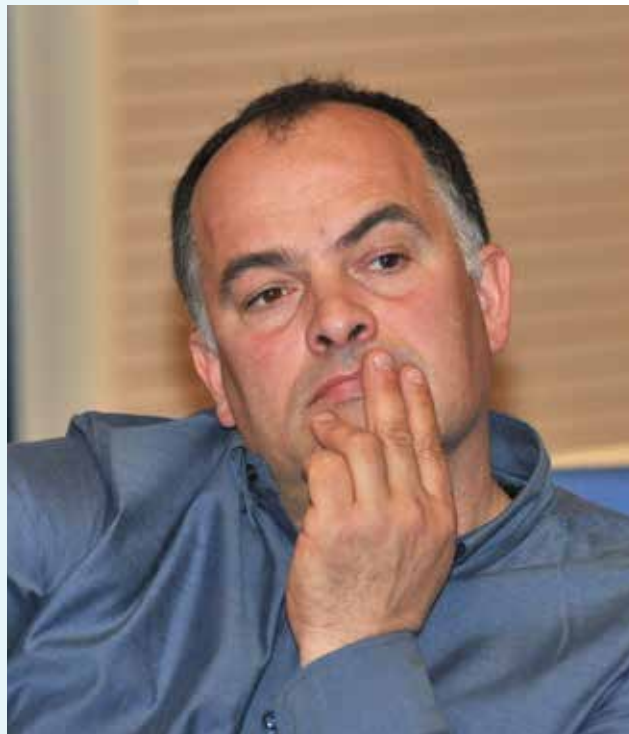

le loro famiglie, ma anche della società tutta, e il territorio dove essi vivono. Solo con una sinergia operosa, dove l'individualismo cede il passo alla collaborazione, si può promuovere un territorio e farlo crescere economicamente e socialmente e contemporaneamente si possono raccogliere benefici e servizi utili e necessari per la quotidianità di ogni famiglia.

Quindi ascolteremo sì le voci del nostro territorio, ma nell'ottica di essere parte di queste esperienze e magari sempre più attori di un rinnovato sforzo per rivitalizzare un processo di coordinamento e integrazione sulle orme dei nostri padri ma con lo sguardo rivolto al futuro.

Mi rendo conto che è un suggerimento che conduce a un percorso non facile, ma penso che l'augurio che possiamo fare a tutti noi per il prossimo S. Natale e per il 2017 sia proprio quello di camminare in questa direzione.

Auguri a tutti!

*Marco Baresi*

**VOCI DALLA COOPERAZIONE DEL TERRITORIO:**  
*esperienze persone e servizi per noi agricoltori e le nostre famiglie*

**SABATO 17 DICEMBRE - DALLE ORE 17.00**

# NOTIZIARIO 2.0

Il bilancio del primo anno di attività del Comitato di Redazione che ha rivisto l'impostazione di "Noi Cooperative"

di **Giampietro Dossena**

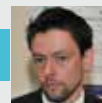

## **Presidente Baresi, dopo un anno di attività del Comitato di Redazione, come giudica il lavoro svolto?**

Uno degli obiettivi più importanti che si è posto il nuovo Consiglio di Amministrazione del Cis consiste nel riuscire a riavvicinare i soci alle "cooperative del cortile".

Questo tema si è tradotto operativamente anche con la rivisitazione di Noi Cooperative, strumento di comunicazione da anni edito dal Cis, ma che necessitava di una sferzata di gioventù e di rinnovamento.

Abbiamo quindi chiesto alle cooperative socie del Cis di individuare un paio di tecnici per cooperativa che potessero essere interessati a cogliere la sfida di rivisitare il nostro giornale, guidati dalla Dott.ssa Silvia Saiani - Responsabile della Comunicazione ed Immagine di Confcooperative Brescia.

Ebbene, il risultato è sotto gli occhi di tutti; Noi Cooperative ha decisamente cambiato passo (anche se la base di partenza era ottima!).

## **A suo avviso qual è stato l'aspetto più importante di quest'anno di lavoro?**

Sicuramente vedere i nostri tecnici lavorare insieme con passione, discutendo - a tratti anche in modo animato, ma sempre con spirito costruttivo - è stata per me una grande soddisfazione.

Stare insieme, partecipare e sostenere la propria opinione senza mai imporla, sono tutti sinonimi di "cooperazione" ed hanno caratterizzato il lavoro del Comitato di Redazione.

Io, ma penso di poter esprimermi anche a nome dei Consiglieri del Cis che rappresento, sono molto soddisfatto. Certo, vi sono ancora molti piccoli aspetti da migliorare e perfezionabili, cosa che sono già allo studio del Comitato di Redazione per il prossimo anno. Nuove rubriche, nuova impostazione, articoli non solo tecnici, ma anche di vita associativa e di cultura cooperativa; insomma continuate a leggerci e non Vi annoierete!

Siamo partiti da una situazione in cui era necessario sollecitare le persone

per avere gli articoli, ad una in cui è necessario tagliare i singoli interventi perché si rischiava di sfiorare con le pagine predefinite. Insomma una bella soddisfazione!

## **Ci può anticipare qualche novità per il 2017?**

Come già detto, per il 2017, sono già in programma delle ulteriori modifiche a Noi Cooperative con l'obiettivo di renderlo un prodotto sempre più vicino ai nostri soci, attuale e leggibile.

Oltre a ciò, ci piacerebbe rivisitare tutta l'impostazione grafica dei Siti Internet delle nostre cooperative in modo tale da dare sempre più l'immagine di gruppo.

Visto che ai nostri tecnici la fantasia non manca, si sta persino ipotizzando una app per i telefoni cellulari in modo di avere un collegamento in tempo reale con i nostri soci, in merito ad informative, promozioni, notizie dalle cooperative, etc.

Tanta carne al fuoco quindi!

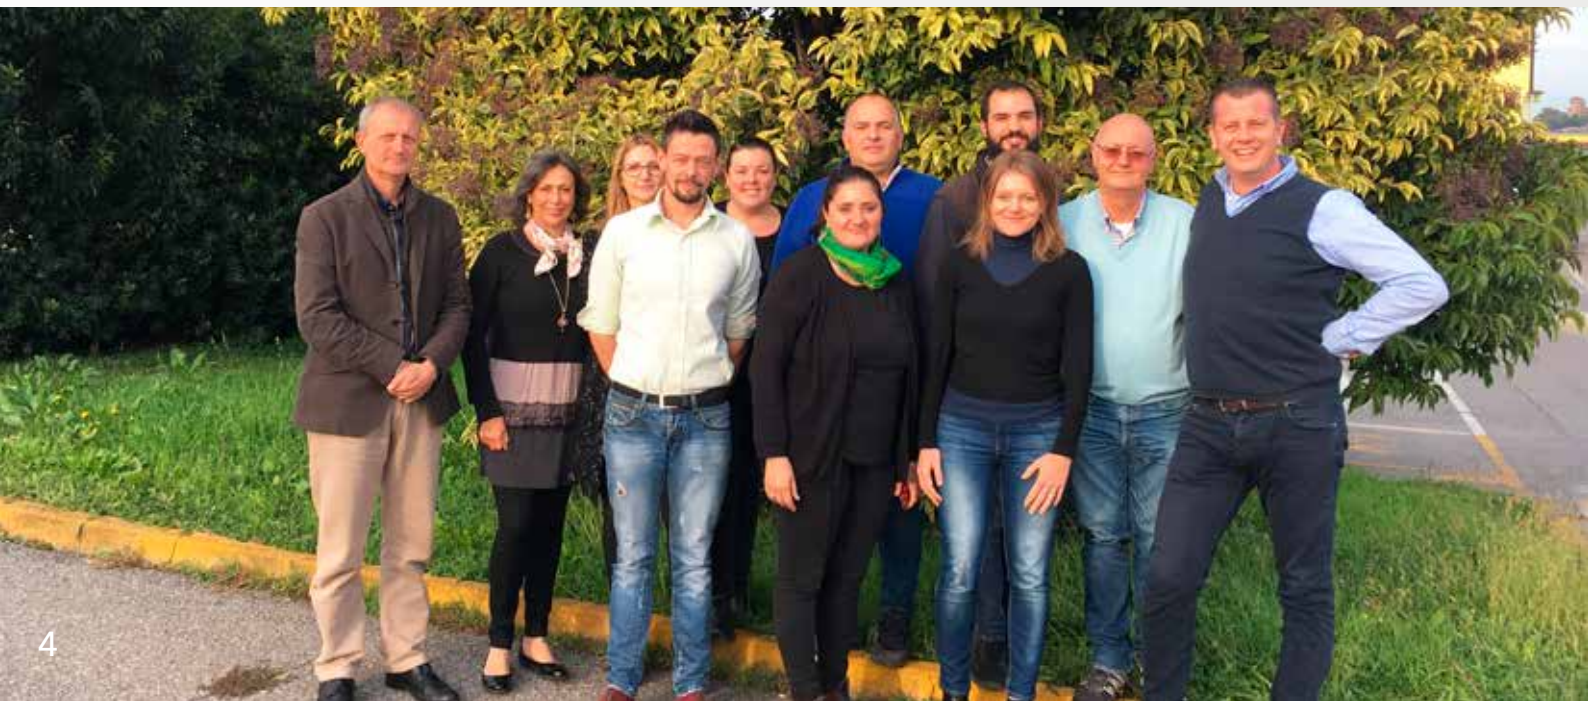

Al socio COMISAG è offerto direttamente o con l'ausilio di professionisti selezionati fra i migliori della provincia di Brescia un qualificato servizio per:

## SETTORE AMMINISTRATIVO

- Scritture contabili
- I.V.A.
- Dichiarazioni dei redditi
- Stesura atti costituzione, variazioni e cessazioni società
- Registrazione contratti
- Paghe
- Inquadramento previdenziale
- Adempimenti CCIAA

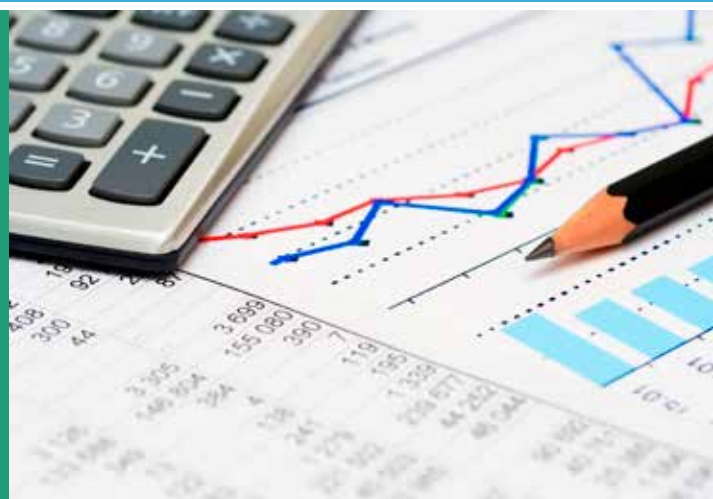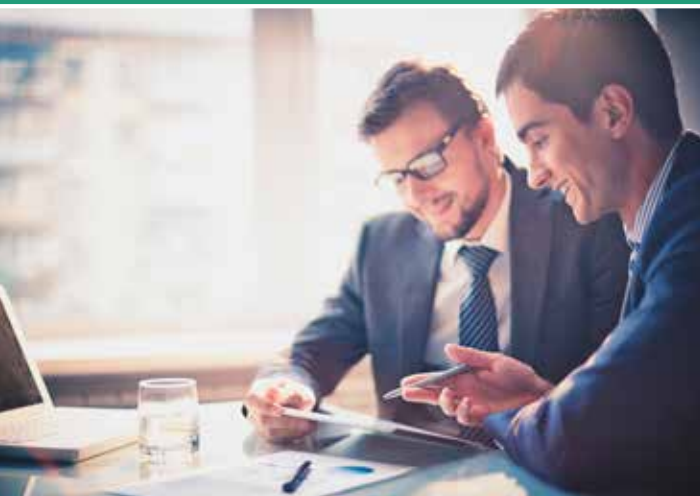

## SETTORE CONSULENZA

- Servizio patronato: assegni famigliari, pensioni, controllo posizione contributiva, infortuni sul lavoro, ecc.
- Consulenza legale
- Consulenza notarile
- Consulenza in materia di sicurezza sul lavoro - Legge 81/2008 (ex Legge 626/94) e corsi di formazione obbligatori

## SETTORE TECNICO

- SERVIZIO C. A. A.
- PAC
- Contratti d'affitto
- UMA (assegnazione annuale gasolio agevolato e immatricolazione macchine agricole)
- Piano di sviluppo Rurale
- Gestione anagrafe bovina, suina ed ovicaprina informatizzata
- Manuale di corretta prassi igienica per gli allevamenti

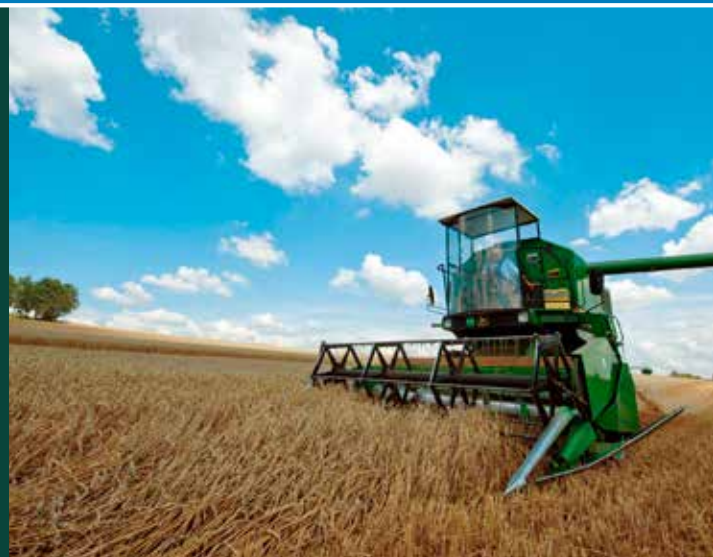

## SPERIMENTAZIONI DI TECNICHE COLTURALI INNOVATIVE

di **Simona Bonfadelli**

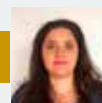

Questa primavera Comab ha partecipato ad un bando del PSR (Programma di Sviluppo Rurale) 2014-2020. Si tratta della Misura 16 sulla "Cooperazione" e, nello specifico, delle sottomisura 16.2 ("Sostegno a progetti pilota e allo sviluppo di nuovi prodotti, pratiche, processi e tecnologie") operazione 16.2.01 ("Progetti pilota e sviluppo di innovazione").

Il tema proposto è stato: "Impiego di Colture di Servizio Agro-ecologico per la coltivazione di Mais e Soia in agricoltura BIOlogica (CSA-MeS-BIO)".

Lo scorso Ottobre ci è stato comunicato ufficialmente che la nostra domanda è stata accettata e il nostro progetto verrà finanziato. Il progetto riguarda la sperimentazione di nuove tecniche colturali finalizzate al controllo delle infestanti per la coltivazione e produzione di mais e soia in agricoltura biologica. Le prove prevedono l'utilizzo di CSA (Colture di Servizio Agro-Ecologico) da terminare mediante allettamento e susseguente semina su sodo del mais e della soia sulla pacciamatura residua, e prove di semina di colture di copertura, poco vigorose, consociate con mais e soia.

Capofila del progetto è Comab e i partner sono Comazoo, il Centro di ricerca per le produzioni foraggere e lattiero-casearie (CREA-FLC) di Lodi e alcune aziende agricole: Azienda Agricola e Agrituristica Renata Lovati, di Albairate (MI), Strale Società

Agricola Srl, di Roverbella (MN), Azienda Agricola Lazzari Alessandra Maria Clara, di Malagnino (CR), Dordoni Maria Teresa e Chiara Erneste Società Agricola Cascina Nuova, di Caselle Landi (LO), Azienda Agricola Maffei Tarcisio di Nuvolera (BS).

Le prove sono già cominciate con le semine in parcelloni (60 m<sup>2</sup>) di leguminose (per le successive semine di mais) e cereali autunno-vernini (per le semine di soia) effettuate da CREA-FLC in queste aziende. Abbiamo squadrato i terreni in modo da creare le parcelle e seminato veccia villosa e trifoglio incarnato in tre aziende, e segale e triticale in altre tre (un'azienda ospita entrambe le semine). È stata usata una seminatrice parcellare a

otto file del CREA-FLC. In primavera semineremo poi altre leguminose e graminacee, poco prima della semina di mais e soia, e quindi valuteremo il controllo delle infestanti delle diverse CSA e colture consociate, nonché i livelli produttivi e i principali parametri qualitativi di mais e soia. Comazoo ci aiuterà nelle valutazioni finali attraverso accurate analisi che effettueremo nel loro laboratorio. La sperimentazione verrà ripetuta per due anni.

Queste prove sono fondamentali per il settore biologico, dove vige il divieto di utilizzo di diserbanti, ma possono essere utili anche nelle aziende convenzionali, perché potrebbero aiutarci ad affinare delle tecniche di coltivazione atte a ridurre l'uso di prodotti fitosanitari.

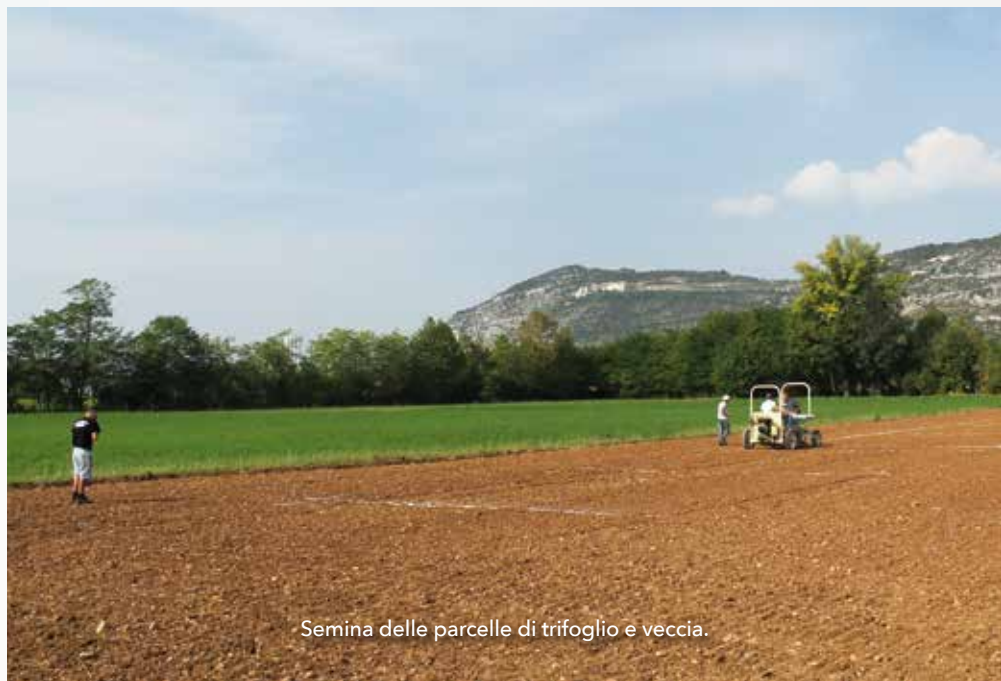

Semina delle parcelle di trifoglio e veccia.

VISITA DI 2 GIORNI CON UNA NOTTE A TITTMONING (GERMANIA)  
VISITA ESCLUSIVA PER AZIENDE AGRICOLE INTERESSATE

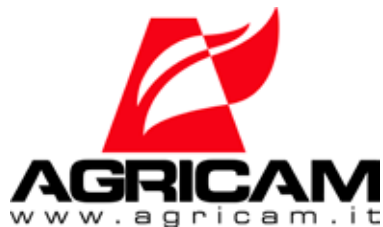

# VISITA FABBRICA

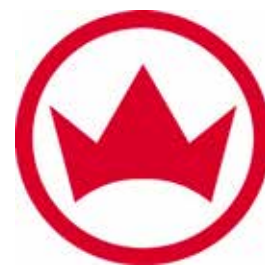

## SILOKING

L'UNIFEED SEMPLICEMENTE INTELLIGENTE

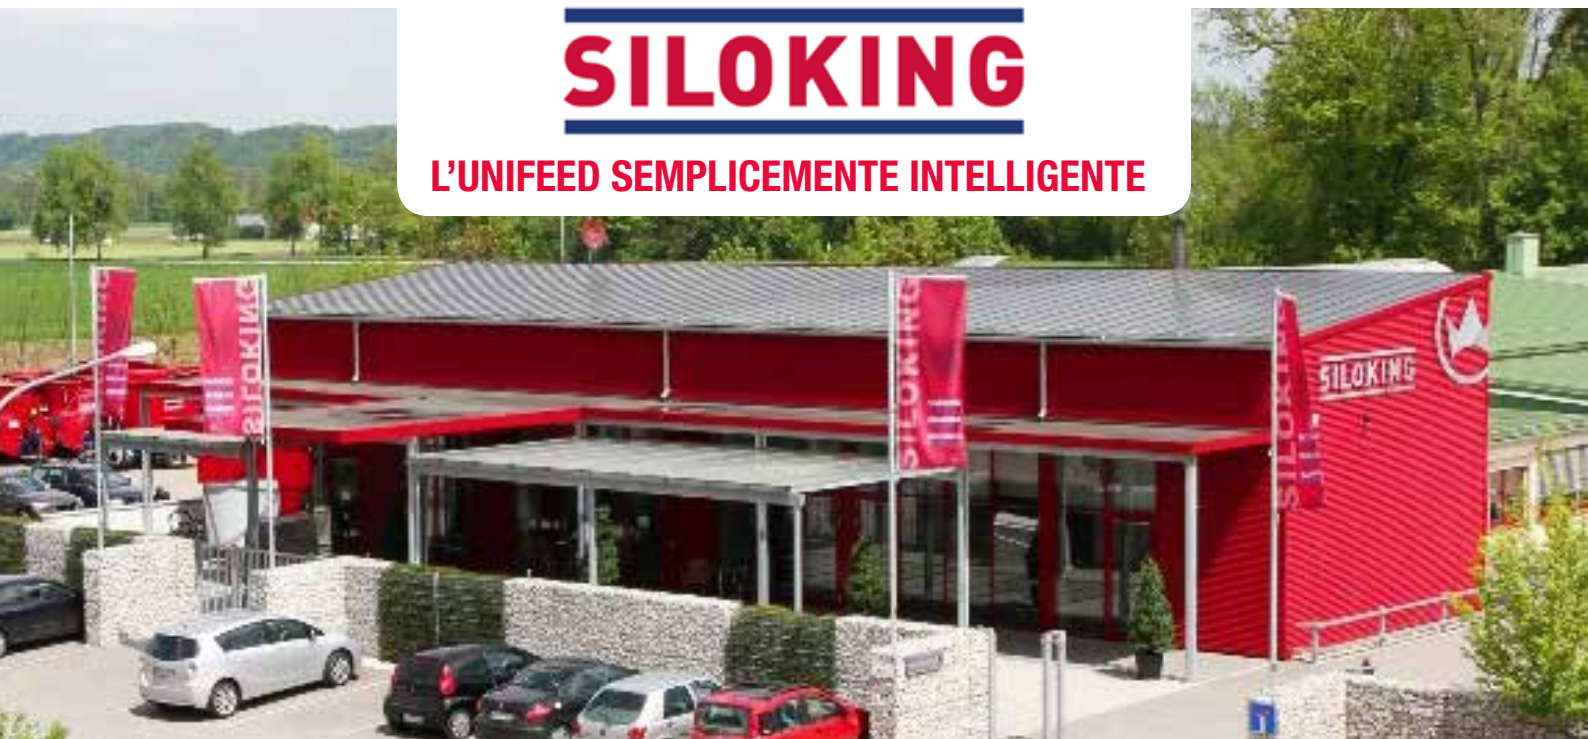

Agricam in collaborazione con SILOKING, organizzerà per il periodo Inverno 2017, per i soci e clienti, una visita alla Fabbrica di carri miscelatori SILOKING di Tittmonig – Germania.

Siloking ci ospiterà presentando la fabbrica e il centro prove, dove sarà possibile testare con occhi e mani l'industria metalmeccanica e i carri Unifeed della loro gamma. Per i partecipanti pernottato, pasti e gadget offerti direttamente dalla SILOKING Service & Training Center.

### DATE DISPONIBILI: 31 GENNAIO e 1 FEBBRAIO

Iscrizioni entro il giorno  
20 gennaio

**7 e 8 MARZO**

Iscrizioni entro il giorno  
24 febbraio

### VISITA PER AZIENDE AGRICOLE INTERESSATE

Iscrizioni presso ufficio  
Agricam oppure 030/961185

**- POSTI LIMITATI -**

## PROGRAMMA DELLA VISITA:

### Primo giorno:

- 6.00 Partenza con Pullman presso il piazzale Agricam
- 13.00 Arrivo alla Siloking e pranzo offerto
- 14.00 Presentazione presso il Training Center e visita stabilimento fabbricazione carri miscelatori Siloking
- 18.00 Conclusione visita fabbrica
- 19.30 Cena offerta presso il pub Siloking

### Secondo giorno:

- 8.30 Dimostrazione e prova carri unifeed presso una azienda agricola e biogas
- 12.00 Pranzo presso il pub siloking
- 13.00 Partenza per rientro
- 19.30 Arrivo a Montichiari

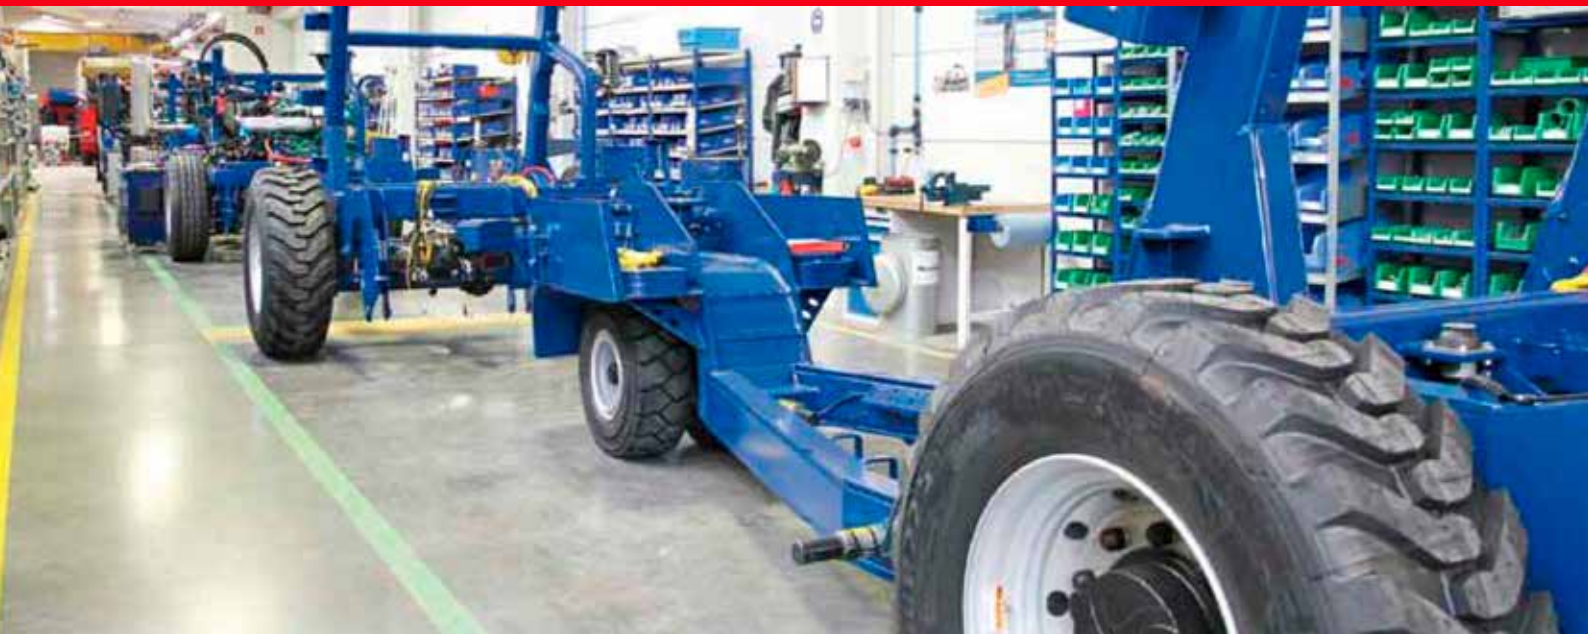

## C'ERAVAMO LASCIATI CON UN "ARRIVEDERCI... A DOPO L'ESTATE!"

di **Tommaso Pucci**  
e **Sonia Rumi**

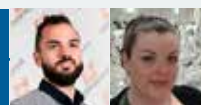

Nei primi giorni di ottobre, il gruppo giovani COOGA si è ritrovato per progettare l'attività per il periodo 2016/2017. Verificando quanto svolto del programma 2015-2016 ed analizzando dinamiche positive e negative dell'anno passato, è stato stimolato un Brainstorming per la proposta di argomenti d'interesse da inserire nel programma 2016-2017.

Due saranno le tematiche, l'accrescimento culturale e conoscenza del mercato odierno, che faranno da filo conduttore per l'anno venturo:

1. Tematiche legate alla attualità della agricoltura e zootecnica come Biologico, Eco sostenibilità, GDO(Grande distribuzione organizzata) e Filiera al fine di sviluppare una cultura che soddisfi le necessità attuali.
2. Rafforzare il gruppo tramite momenti aggregativi: visitando sedi di marchi e aziende che le cooperative hanno selezionato; realizzando un evento per la presentazione del gruppo ed altri giovani; scegliendo dei gadget che aumentino il senso di appartenenza.

Queste due tematiche principali saranno accompagnate da ulteriori approfondimenti inerenti i diversi indirizzi produttivi aziendali (latte e carne) e le gestione economica dell'azienda. Questi argomenti sono già stati in parte affrontati e verranno ulteriormente discussi durante il prossimo anno. Alla conclusione della redazione del programma 2016-2017, i ragazzi hanno definito una frequenza d'incontro mensile, identificando come momento di ritrovo il primo mercoledì/giovedì del mese. Questo vuol dare un metodo nello svolgimento delle attività e nel raggiungimento degli obiettivi proposti. Queste serate saranno dedicate non solo allo svolgimento del programma formativo, ma anche alla maturazione di attività richieste dal nostro consorzio CIS e a momenti ricreativi per rafforzare l'aggregazione.

In seconda battuta, con lo scopo di velocizzare l'organizzazione degli eventi e snellire lo scambio di idee tra i coordinatori e il gruppo, ogni incontro formativo sarà organizzato da dei "gruppi di lavoro tematici".

I "gruppi di lavoro tematici" saranno composti da massimo 3 referenti del gruppo con un interesse tematico formativo specifico e si incontreranno con i coordinatori per organizzare gli incontri/uscite.

Speriamo che tutto questo porti ad un forte accrescimento personale del ragazzo/a e del gruppo, con la speranza di promuovere la crescita di giovani agricoltori in cooperativa in quanto rappresentano la componente più dinamica dell'agricoltura e possono contribuire in maniera importante allo sviluppo dell'economia. A proposito di ciò, i consigli delle vostre cooperative hanno ridato la possibilità ai ragazzi di partecipare come "Uditori" presso i consigli di amministrazione delle cooperative del CIS, al fine di dar loro una formazione in campo amministrativo. Allo stesso tempo i ragazzi stessi possono essere interpellati riguardo a determinate questioni discusse nei consigli.

Un ulteriore progetto da parte di ei ragazzi consiste nel farsi conoscere anche telematicamente attraverso articoli pubblicati sui siti di settore.

Ricordiamo sempre gli ideali del gruppo CooGA, la FORMAZIONE e L'AGGREGAZIONE di giovani agricoltori, la PROMOZIONE del CooGa all'interno del mondo delle cooperative e intenti di SOLIDARIETA' SOCIALE. Invitiamo, dopo la lettura di tale articolo, a non esitare a contattarci per ulteriori informazioni o per far parte della nostra squadra.

### Qui i nostri riferimenti:

Tommaso Pucci - 333.1766369 - pucci@agricam.it

Sonia Rumi - 335.7896281 - srumi@comazoo.it



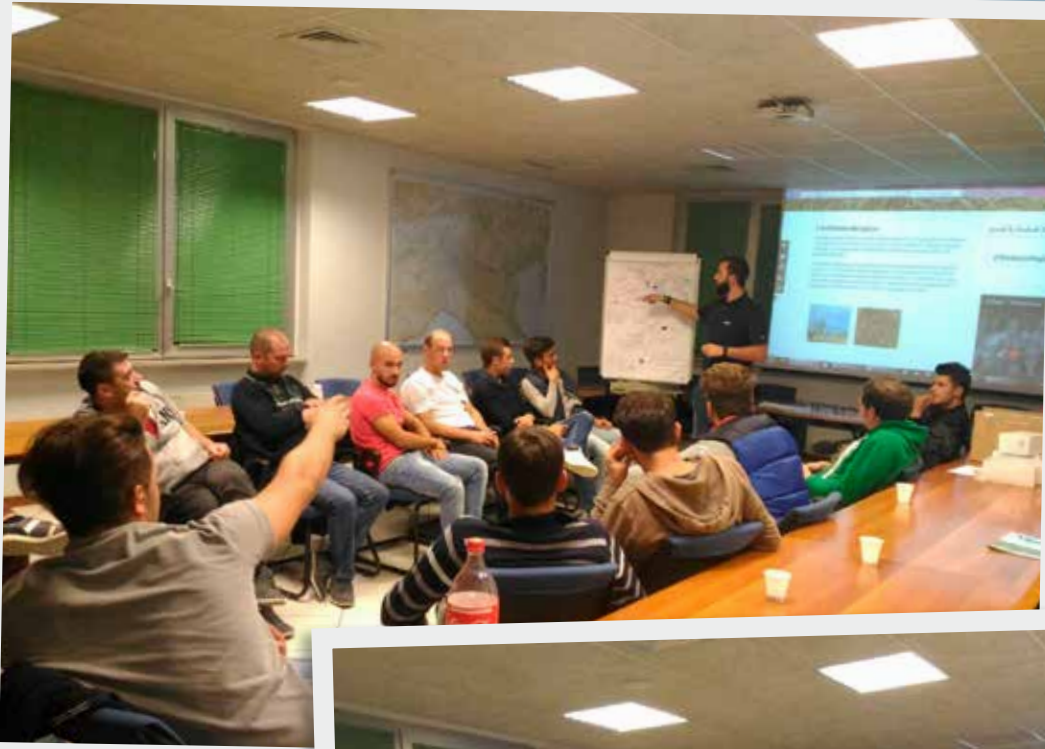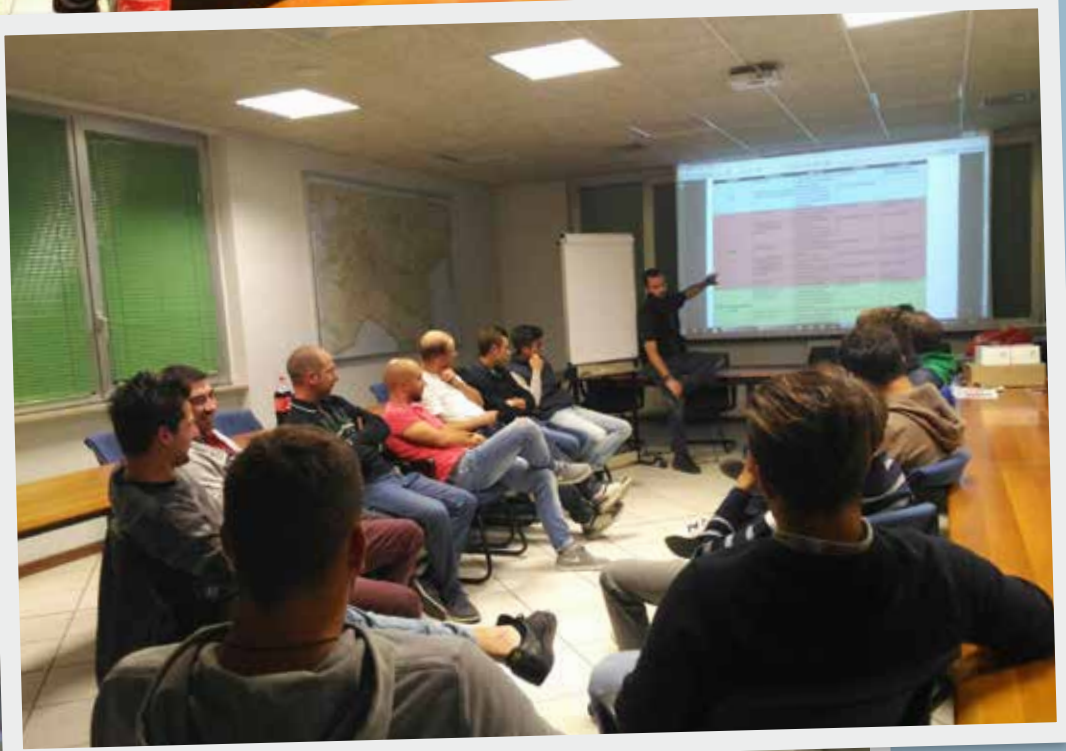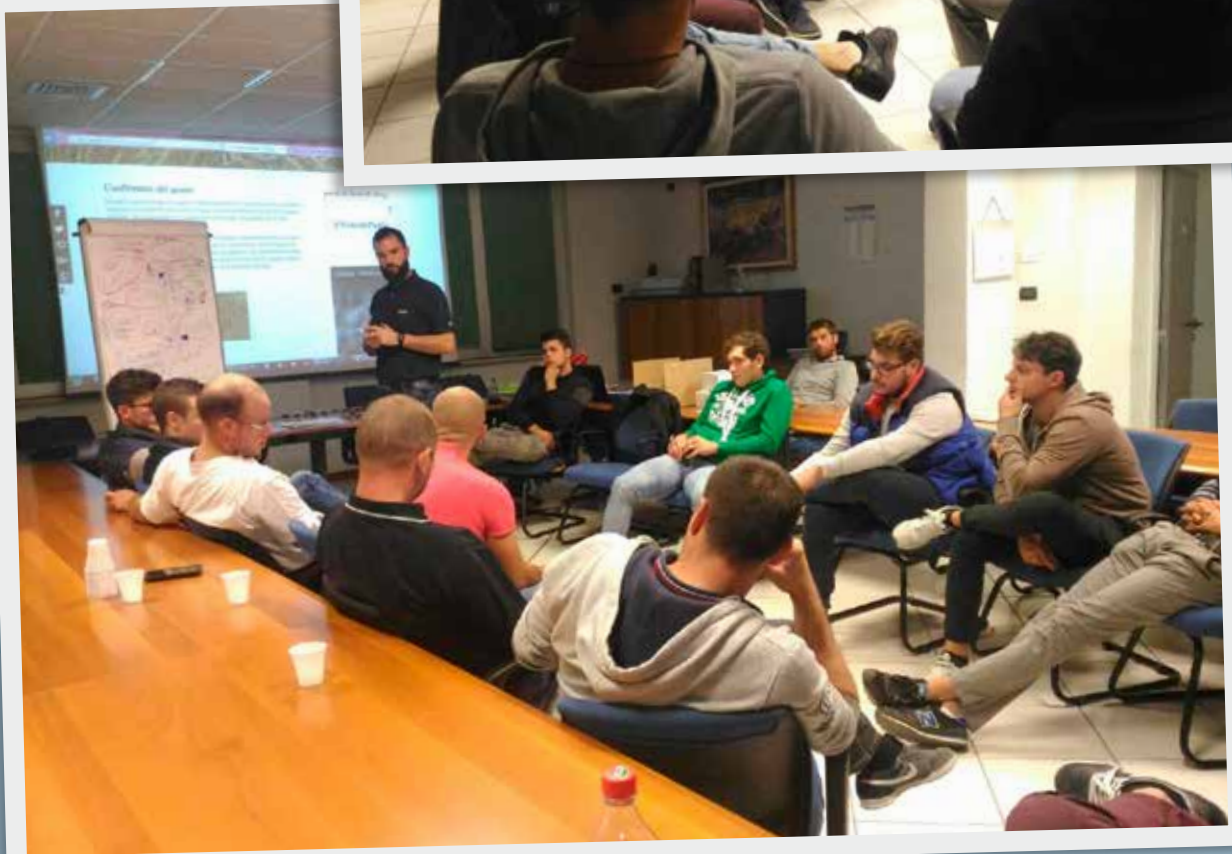

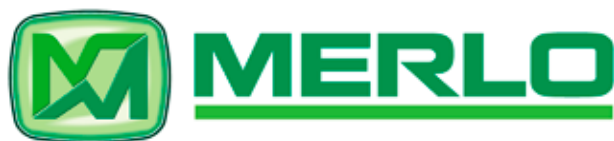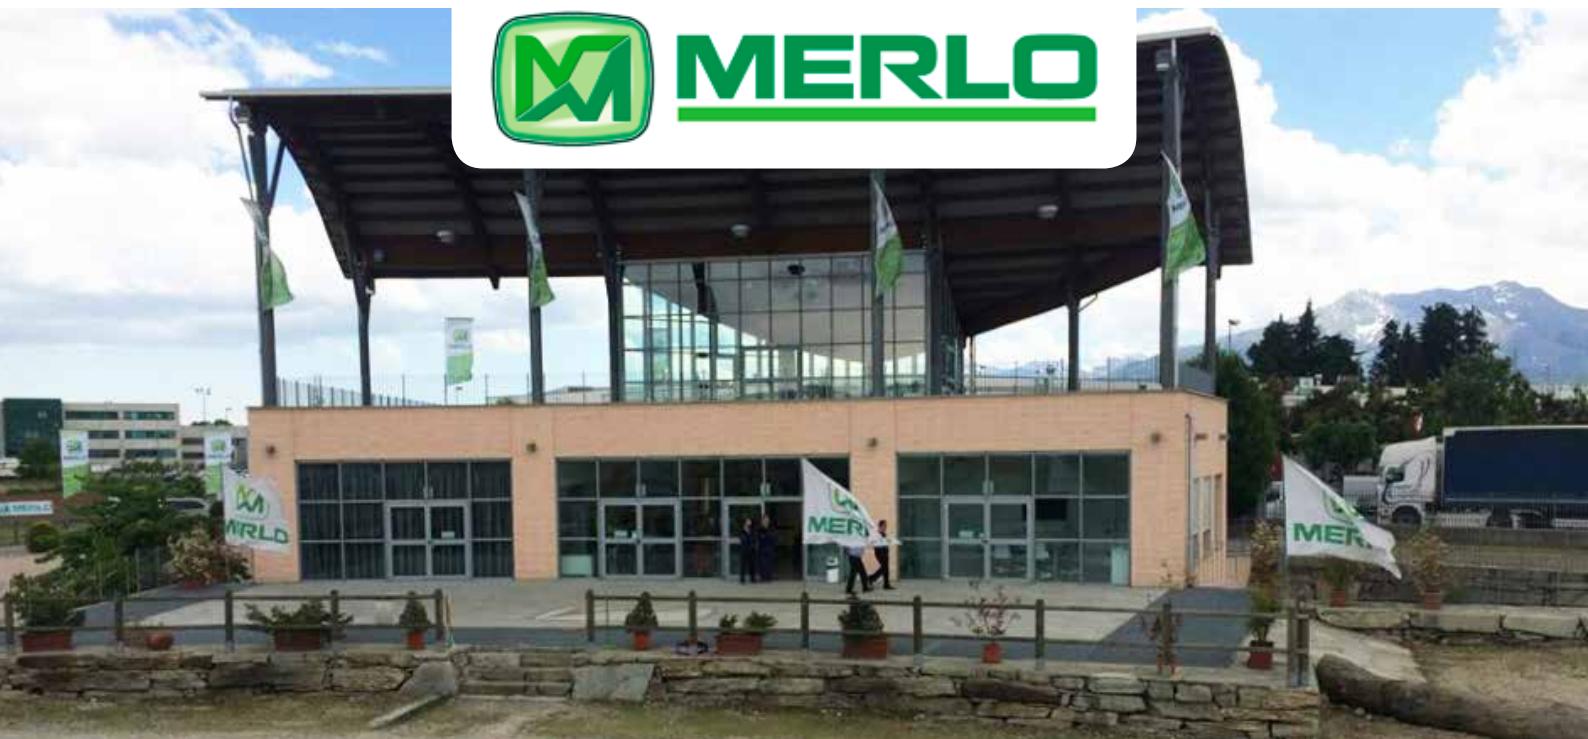

AGRICAM in collaborazione con MERLO, ha organizzato per i nostri soci e clienti, una visita al mese alla fabbrica Merlo di Cervasca a Cuneo. Merlo ci ospiterà per tutta la giornata, presentazione fabbrica e centro prova, dove sarà possibile testare con occhi e mani l'industria metalmeccanica e i telescopici della loro gamma.

Per i partecipanti pranzo e gadget offerti direttamente dalla MERLO SPA.

## DATE DISPONIBILI:

- **12 DICEMBRE**  
Iscrizione entro il giorno **7 dicembre**
- **26 GENNAIO**  
Iscrizione entro il giorno **23 gennaio**

## PROGRAMMA DELLA GIORNATA:

- 06.00:** Partenza con Pullman presso il piazzale AGRICAM
- 09.30:** Arrivo alla Merlo e visita fabbrica
- 12.30:** Pranzo offerto dalla Merlo
- 13.30:** Campo prova
- 16.00:** Partenza per rientro
- 19.30/20.00:** Arrivo a Montichiari

**ISCRIZIONI PRESSO UFFICI AGRICAM  
OPPURE 030/961185 - POSTI LIMITATI**

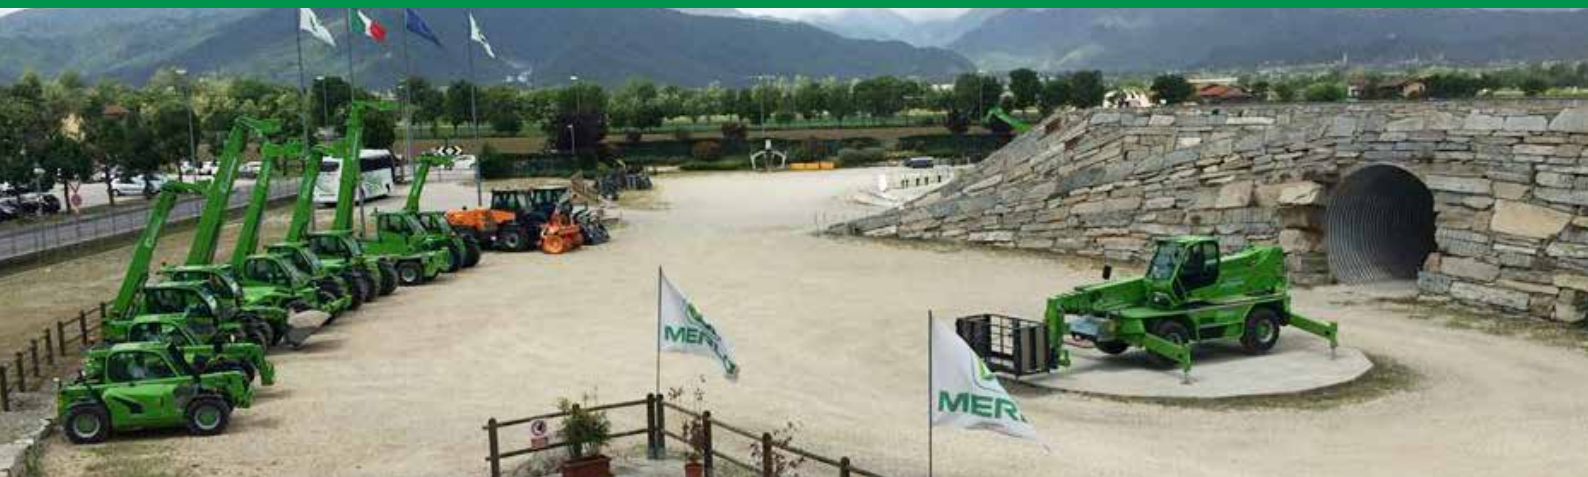

# la parola al socio

## SCATTI DI SCENA DALLA FIERA DI CREMONA

Fiere Zootecniche Internazionali di Cremona, da Mercoledì 26 a Sabato 29 Ottobre, è una delle kermesse più importanti a livello internazionale per gli operatori professionali dell'agricoltura e dell'allevamento, 4 settori in un unico grande appuntamento: zootecnia da latte, suinicoltura, avicoltura e trasformazione del latte. Le cooperative hanno partecipato

tutte unite all'interno del padiglione 4 nella "Cittadella della Cooperazione", e come gruppo CIS abbiamo portato 2 convegni su 2 tematiche molto presenti nel nostro quotidiano, "il ricambio generazionale - Nuove innovazioni e marketing nelle aziende" e "Analisi Tecniche, Economiche e finanziarie sull'inserimento del Robot Mungitura", tematiche che hanno vi-

sto i partecipanti molto interessati e allo stesso tempo arricchiti di novità da portare nelle loro aziende. Consigliamo a tutti i nostri Soci di approfittare di queste occasioni per ricercare nuove idee.

Ecco alcune foto della nostra partecipazione alla fiera del BovinoDaLatte di Cremona:

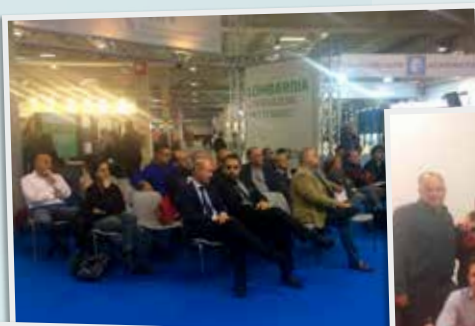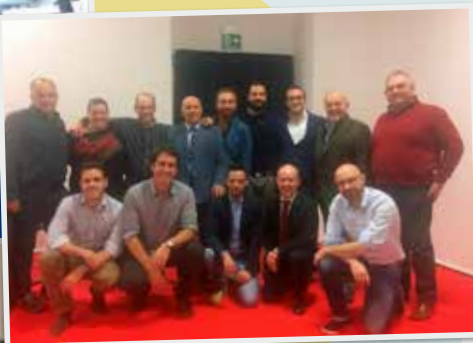

Convegni

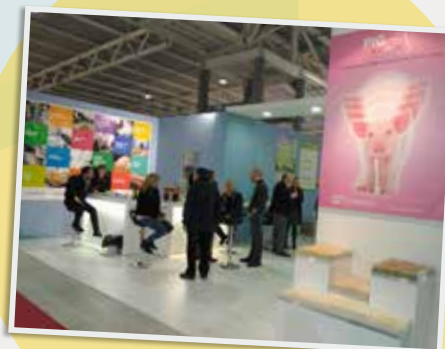

Cittadella della cooperazione

Stand esterno

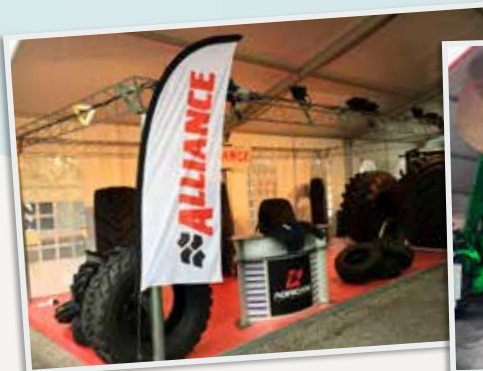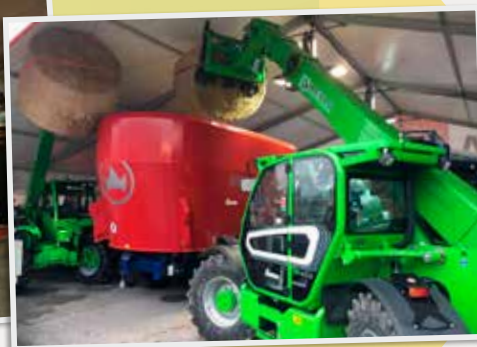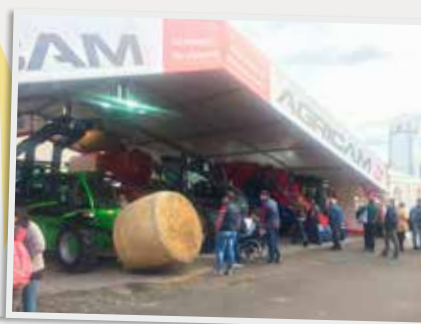

# OPEN DAY PER IL GIARDINAGGIO

di **Simona Bonfadelli**  
e **Fabio Chiarini**

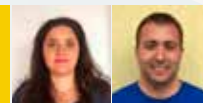

Lo scorso 8 ottobre in Comab è stato organizzato un "OPEN DAY" dedicato al settore del giardinaggio. L'evento è stato organizzato per fare conoscere ai nostri soci alcuni prodotti specifici per quel settore e per dare l'opportunità di approfondire le loro conoscenze. Durante la giornata infatti, una trentina di soci, hanno avuto la possibilità di seguire un'interessante seminario sull'uso in sicurezza della motosega e hanno ricevuto un attestato di frequenza. Il corso è stato tenuto da Matteo Zanotto di Jonsered. Jonsered ha anche organizzato una gara di gimcana con i front-rider. La gara è stata vinta da Massardoni Alessandro, nostro socio, che ha ricevuto come premio un decespugliato-

re Jonsered CG2128C. In esposizione anche svariate macchine della loro linea: trattorini, soffiatori, motoseghe, decespugliatori, tagliasiepi, rasaerba. Anche questa volta, a intrattenere i soci, c'era Mario Midali, con le sue sculture realizzate con la motosega.

In mostra anche le macchine della Grillo, un nuovo marchio che da poco si può trovare in cooperativa. Si tratta di macchine professionali da giardinaggio, motozappe e motocoltivatori. Hanno esposto i loro prodotti anche altre aziende che collaborano con Comab: Garmec, con la gamma di rasaerba GKZ; gli atomizzatori Farmer; i biotrituratori Ohashi; Tron con la gamma di pulivapor; Vitali Re-

migio con i robot rasaerba (autower) Husqvarna; Archman con tutta la linea professionale di cesoie e potatori. Presente anche Agricom con in esposizione alcuni trattori Valtra e Botti del Diserbo Unigreen. I giardinieri, e non solo, hanno avuto la possibilità di confrontarsi direttamente anche con i nostri fornitori di mezzi tecnici.

C'erano infatti quel giorno i tecnici di ILSA, azienda specializzata in fertilizzanti; di GreenRavenna, che sviluppa prodotti per la nutrizione e la cura delle piante, anche nel settore biologico; di Compo, azienda che produce concimi e fertilizzanti speciali; Tempo Verde, ditta che promuove sementi e prodotti per i tappeti erbosi.

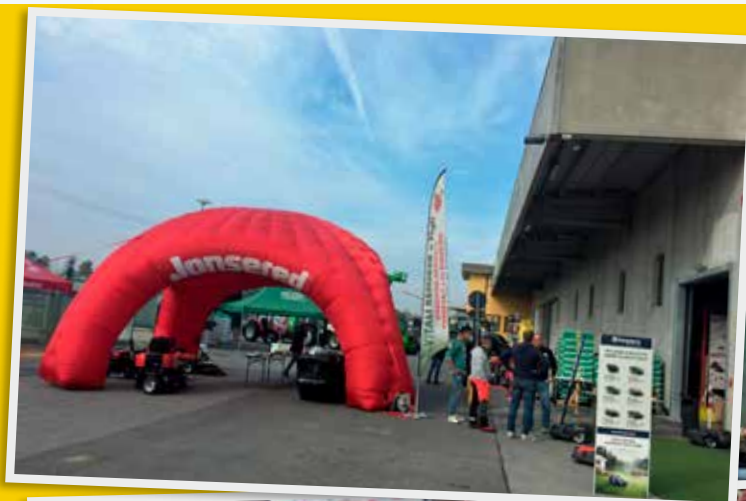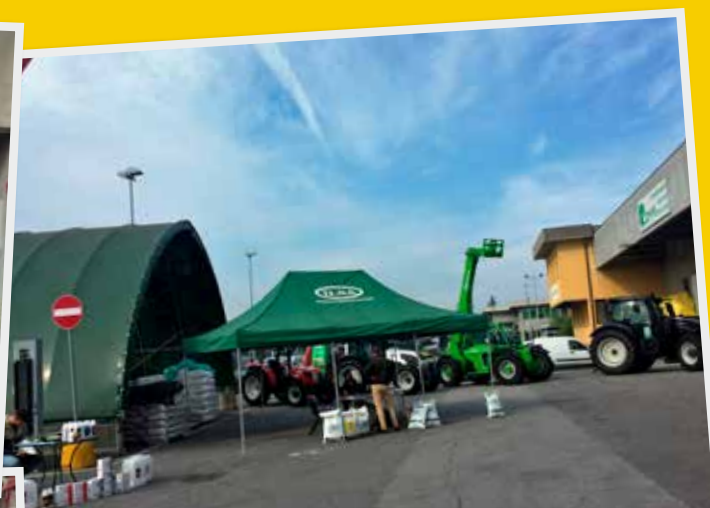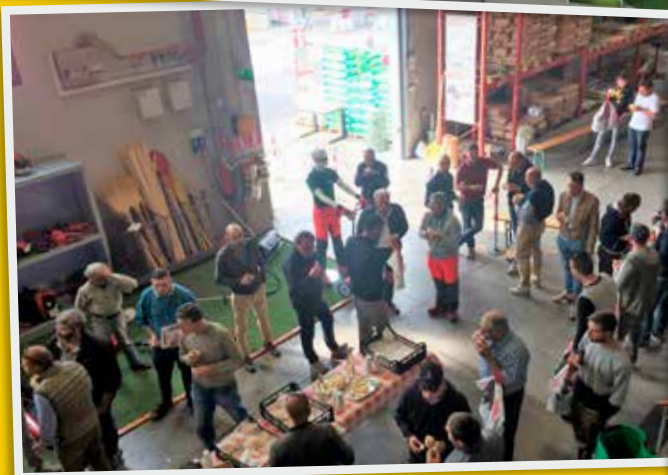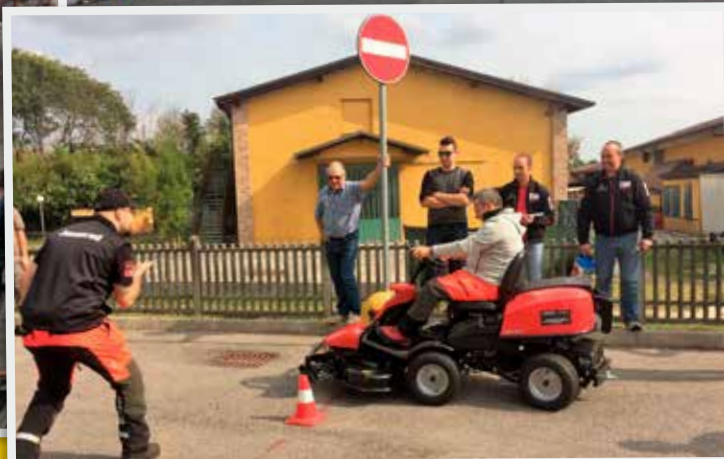

# SILOKING APRE LE PORTE AI SOCI CIS

di **Cristian Zappettini**

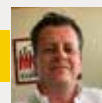

Il 18 e 19 ottobre Agricam ha organizzato per i soci CIS una visita veramente interessante al suo nuovo partner di carri miscelatori SILOKING presso la loro sede a TITTMONING nella verde Baviera Tedesca.

Con partenza di buon mattino i nostri 25 allevatori accompagnati da 5 tecnici della cooperativa hanno viaggiato verso la meta tedesca con il preciso obiettivo di visitare e scoprire i segreti di quanto sino ad oggi era stato riportato nelle varie riunioni informative oltre che dai collaboratori interni. Accolti da tutto lo staff SILOKING dedicato al mercato Italia e da un instancabile GEORG MAYER, Presidente e proprietario della omonima ditta, il compatto gruppo è stato accomodato nella sala riunioni per una soddisfacente panoramica sull'azienda e sulla gamma prodotti dopodiché il vero entusiasmo si è visto e palpato di mano all'aprirsi delle porte del polo produttivo.

Tutti i segreti costruttivi, i materiali in uso, le tecniche di montaggio e controllo erano a disposizione di chi normalmente compra il prodotto finito senza saperne i retroscena. Da perfetti utilizzatori hanno potuto così fare le più interessanti valutazioni sui processi oltre innumerevoli domande tecniche sul prodotto. Risultato finale: un sacco di bocche aperte dallo stupore e molto entusiasmo per un prodotto ritenuto da loro stessi tecnologicamente avanzato e di qualità al top delle aspettative. La ciliegina sulla torta è arrivata quando Mayer ha scoperto da un locale "segreto" la novità 2017 nel panorama dei carri miscelatori che verrà presentata in occasione della fiera EUROTIER a novembre in Germania.

Chiusa la giornata di lavori si è dato inizio alla parte sempre molto apprezzata della serata: Cena tipica Bavarese con birra fresca e maialino al forno il

tutto servito presso il BISTRO situato all'interno della sede aziendale. Musica, balli e tanta simpatia a completare una gita già bella di suo.

L'indomani dopo un benvenuto presso gli uffici direzionali il team AGRICAM e i suoi soci sono stati accompagnati a vedere un impianto di BIOGAS alimentato con i carri SILOKING. Commenti positivi sono usciti vedendo questi macchinari al lavoro oltre all'ammirazione per velocità, silenziosità e potenza dimostrati.

Un breve resoconto generale sulla visita compiuta, un ottimo pranzo consumato al BISTRO SILOKING e nel primo pomeriggio la ripartenza verso l'Italia. Prossima visita? A fine Novembre... e non perdetevi l'occasione di passare 2 giorni in amicizia alla scoperta di una realtà molto interessante. SILOKING l'unifeed semplicemente intelligente.

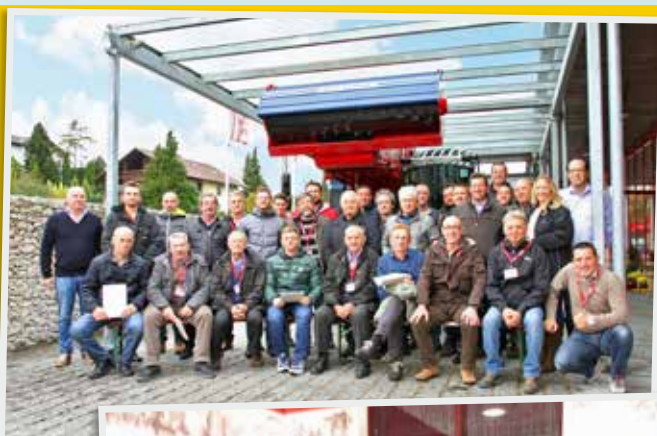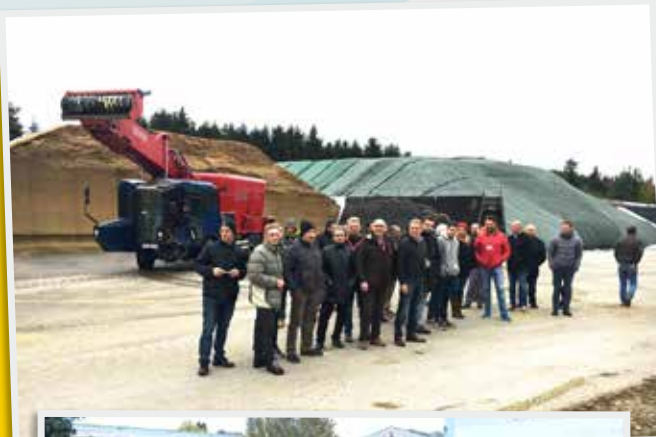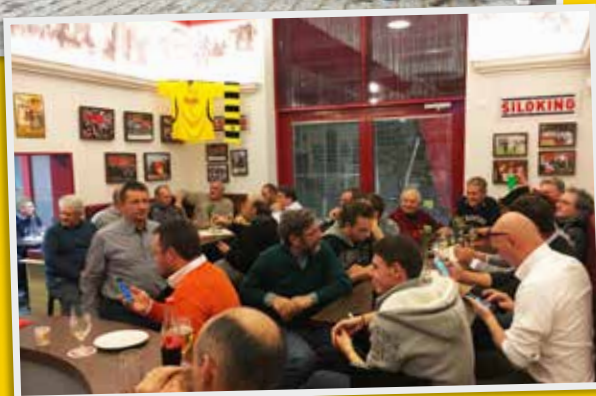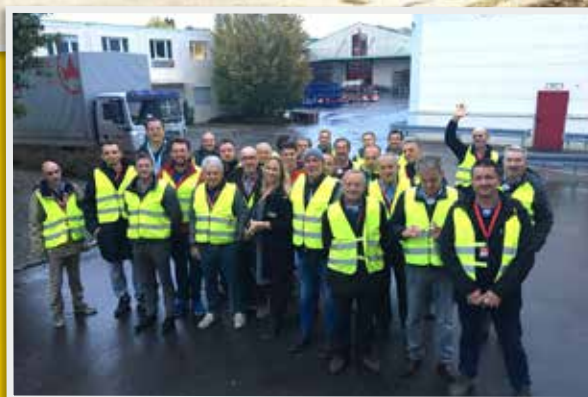

# ALLA SCOPERTA DELLA SICILIA

di Massimo Venturi

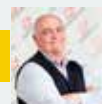

A sedici anni dall'ultima occasione il CIS è tornato ad organizzare per i soci un viaggio dai contorni culturali ed eno-gastronomici. Un'attesa lunga ma certamente ripagata dalle meraviglie della terra di Sicilia, come potranno testimoniare i 27 partecipanti all'evento fortemente voluto dal presidente Marco Baresi. Se non nei termini strettamente numerici, il successo del viaggio arriva dall'entusiasmo dei partecipanti che, a pochi giorni dal rientro a Brescia, già stanno pensando alla prossima meta. L'evento infatti non è stato solo un semplice viaggio, ma è stato anche e soprattutto occasione per i soci d'incontrarsi, conoscersi e consolidare un gruppo attraverso molteplici momenti conviviali, condividendo assieme i panorami mozzafiato e le gustosità della cucina siciliana oltre che a confrontarsi con la sua peculiare realtà produttiva.

Il programma, organizzato nei dettagli dall'agenzia Personal Event, rappresentata dalla sempre attenta Elena Redenti, ha preso il via dalla splendida Palermo dove i viaggiatori hanno potuto saziare subito la fame di Sicilia grazie alla gustosa "focaccina".

Tuttavia non di sola focaccina vive l'uomo e a colpire, nella mezza giornata di visita alla città, è stato senza dubbio lo splendore della Cappella Palatina, preludio alla passeggiata notturna per le lussuose vie del centro. Solo una "toccata e fuga" quella per Palermo, che certamente avrebbe meritato una visita più tranquilla. Ma il tempo è tiranno, e la seconda giornata ha portato i viaggiatori alla scoperta prima di Monreale e del Duomo coi suoi mosaici in stile normanno-bizantino, e poi di Marsala dove non

è potuta mancare la visita alle Cantine Florio, sede di produzione tra le più rinomate del vino che della città di Marsala porta il nome. Tra gli antichi corridoi colmi di botti, la storia e le tecniche di produzione, sono arrivati anche i doverosi assaggi che, riscuotendo notevole successo, hanno sciolto gli animi e galvanizzato i viaggiatori.

Spettacolare a seguire l'estemporanea visita alle Saline di Marsala, suggerita da Vincenzo, onnipresente accompagnatore locale che con verve, simpatia e profonda conoscenza di luoghi e costumi, ha saputo raccontare per tutta la durata del viaggio le sfaccettature culturali e agricole di una terra tanto bella quanto complicata. Nonostante la stanchezza per la lunga giornata, la serata in albergo è stata animata da danze folkloristiche e i soci più ballerini hanno potuto cimentarsi in danze locali.

L'impegnativo terzo giorno parte con la visita all'imponente sito archeologico di Selinunte dove tra elementi originali e ricostruiti è stato possibile rivivere gli splendori della Magna Grecia. Un lungo spostamento in pullman fino ad Agrigento ha poi permesso di godere dei suggestivi e variegati panorami siculi, tra colline dal sapore toscano e lussureggianti agrumeti. Ad Agrigento immancabile la visita alla Valle dei Templi con una stupenda vista delle rovine e del mare in mezzo ad una distesa di mandorli.

Taormina è stata invece la tappa del quarto giorno. Alle pendici di un timido Etna sempre nascosto da nubi, i soci hanno potuto visitare l'Anfiteatro greco-romano ed ammirare il panora-

ma di paesi arroccati sulla sommità di improbabili cime, sfidando le più basilari leggi della fisica. Per gli amanti dello shopping e della bella vita, Taormina è stata anche occasione per passeggiare tra le vie delle grandi marche e godere dei ristoranti più blasonati oppure per rilassarsi con una passeggiata nel fiabesco giardino dell'hotel Naxos Beach o, perché no, godere di un bel massaggio per meglio affrontare le fatiche del viaggio. Dopotutto la visita alle Cantine Tornatore ed i lunghi assaggi di vini bianchi e rossi avevano certamente richiesto notevole impegno. L'ultima giornata ha portato i viaggiatori a Bronte e alla scoperta della produzione dei famosi pistacchi coltivati sulle pendici dell'Etna in una piccola e particolare fascia di terreno dove le piante hanno la possibilità di crescere fino a dimensioni fuori dal comune.

A Maletto invece è stato possibile scoprire tutto sulla produzione locale di fragole (coltivate fino a Novembre) ed assaggiare il gustoso sorbetto di fragole con panna. L'ultima tappa del viaggio è stata una fugace visita per la città di Catania che ha colpito per la sua esplosiva allegria, vivacità e per il fervore culturale.

Nonostante il traumatico rientro (dai 26° di Catania ai 10° di Montichiari) il CIS si è subito messo al lavoro per organizzare il prossimo viaggio. Destinazione da stabilirsi anche se la mediterranea isola di Malta sembra stuzzicare le fantasie di molti, sicuri che non si dovranno attendere altri sedici anni e che, visto il successo dell'esperienza siciliana, molti più soci decideranno di partecipare.

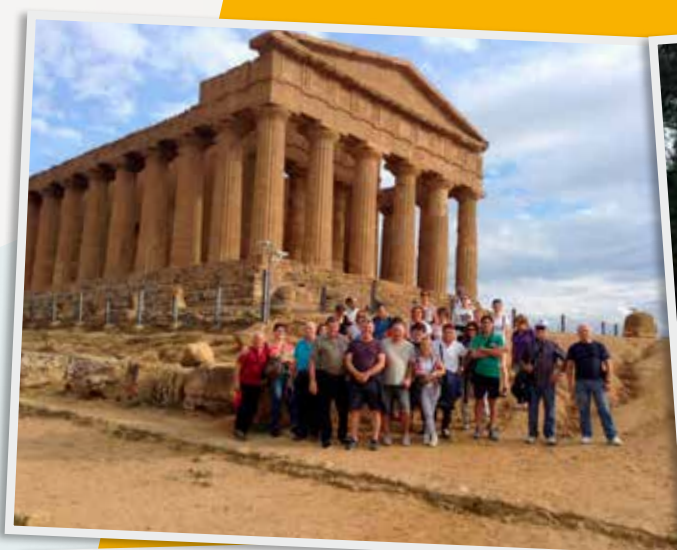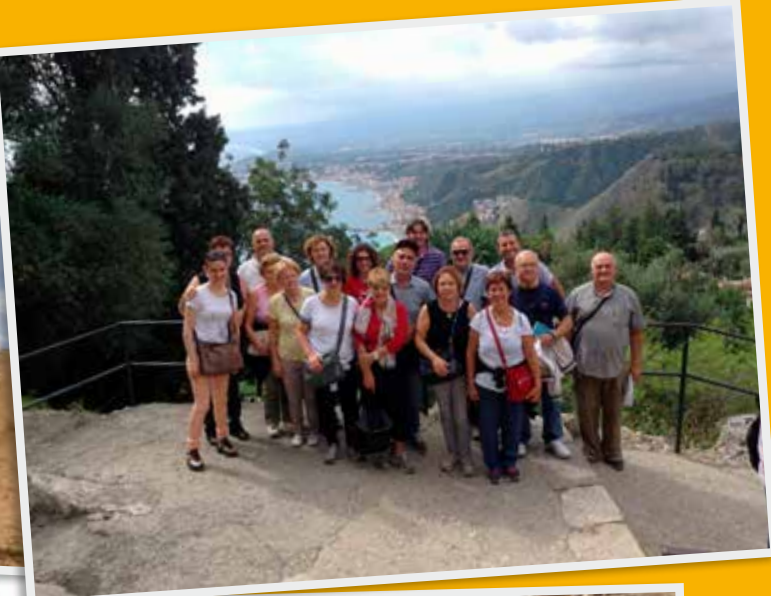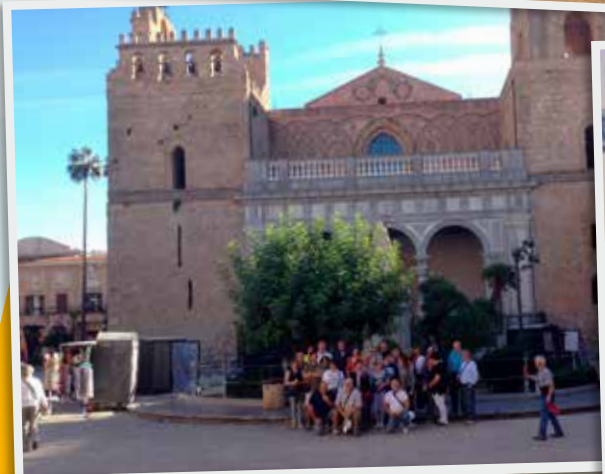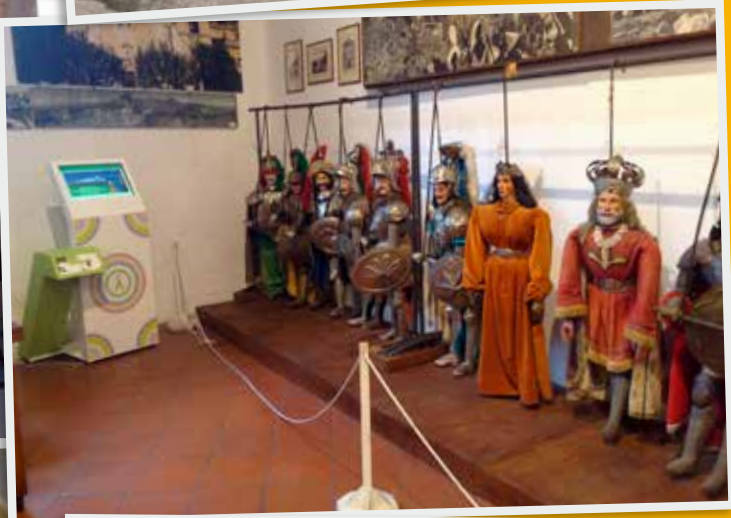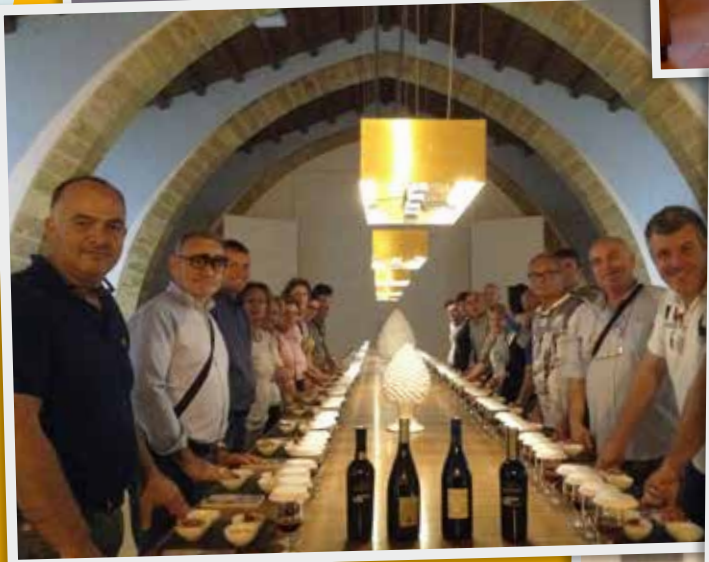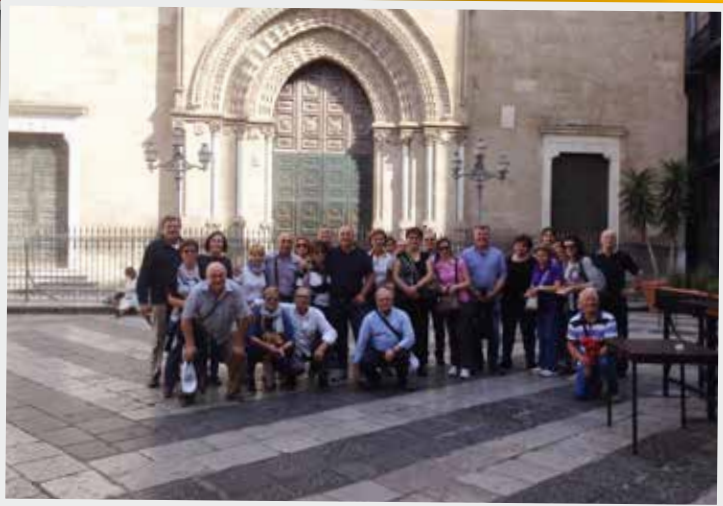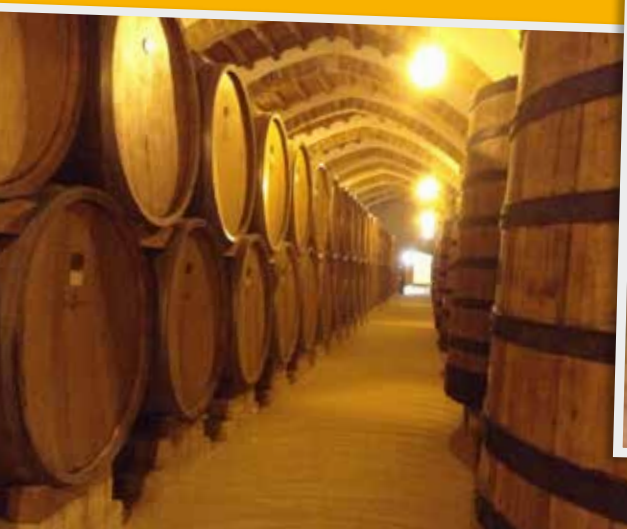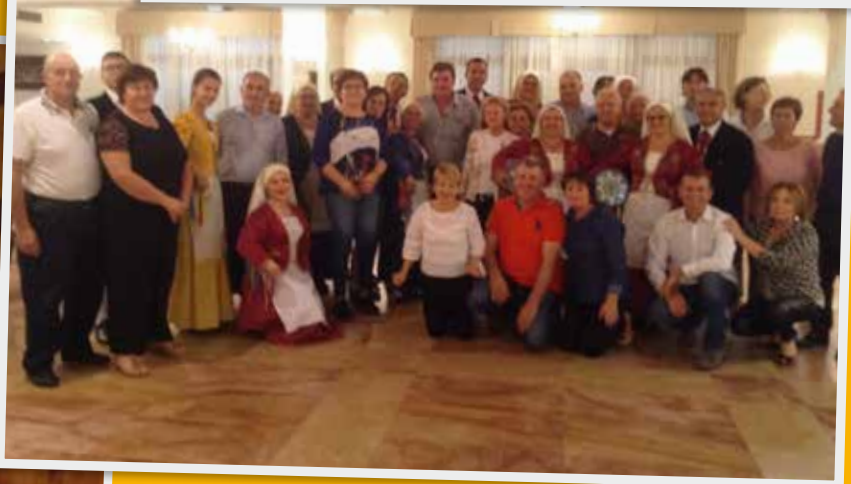

# LA COOPERAZIONE NEI TERRITORI

Essere instancabilmente propositivi percorrendo strade nuove rispettose di esperienze, persone, nel pieno rispetto dei valori della cooperazione.

di **Marco Menni**

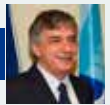

Parto dal termine territori: le comunità locali stanno vivendo un periodo che potrei definire extra ordinario. Lo è per ricchezza di accadimenti, per la tumultuosità dei cambiamenti, per la imprevedibilità dei mutamenti. Lo è per un contesto economico che continua a rivelarsi il più difficile dal secondo dopoguerra.

Secondo termine: cooperazione. Per quanto riguarda la cooperazione in termini di qualità della forma operativa, pochi elementi bastano a fornire la “diversità” rispetto al contesto sopra accennato. I dati statistici non costituiscono certamente l'essenza del nostro operato. Il numero delle cooperative bresciane aderenti si è andato riducendo del 3% nell'ultimo quadriennio. L'andamento degli occupati rivela un primo significato di una stagione importante. Con indici di disoccupazione a due cifre, gli occupati dalla cooperazione sono cresciuti del 4%. Con un Pil in decrescita il valore della produzione delle Cooperative bresciane ha, viceversa, registrato una percentuale positiva.

Numeri che testimoniano di un percorso contrassegnato da operosa concretezza. Che ci dicono che siamo un sistema cooperativo dinamico, equo e partecipato, non obsoleto nelle proposte, credibile nel nostro essere.

Numeri che non garantiscono il futuro, ma rendono oltremodo prezioso il presente, risultato di quello che Papa

Francesco, durante l'udienza del febbraio 2015, ha definito lo sconvolgimento della matematica da parte della cooperazione, dove “uno più uno fanno tre”.

Siamo imprese che in tempi di crisi restano straordinarie, creando lavoro, offrendo valore aggiunto di generosità e di eguaglianza, alla continua ricerca fra sostenibilità economica e risposte ai bisogni dei soci, dei lavoratori, della comunità.

La cooperazione oggi si rivolge pure, per elencare solo alcune possibilità, a servizi di educazione, di cura, di assistenza, cooperative che tengono aperti circoli o negozi alimentari in località disagiate o periferiche, cooperative che favoriscono coesione sociale aggregando persone, dando lavoro a donne e uomini che nessuna altra impresa vuole, cooperative che producono cultura. Non mancano primarie strutture agroalimentari, di distribuzione farmaceutica, di logistica, di credito: imprese e uomini di cui andiamo orgogliosi, poiché continuano a sostenere l'economia locale senza rinunciare alla comune matrice mutualistica, e anzi, facendo del marchio cooperativo un distintivo qualificante.

Gli esempi intrapresi e quelli in corso testimoniano la concretezza di queste opzioni. Penso, per esempio, alla filiera edilizia dove cooperative sociali ed edilizie hanno già fatto sbocciare nuove progettualità nell'Housing sociale ed altro ancora; la filiera delle at-

tività sociali e sanitarie, già in grado di aggregare varie cooperative, medici, strutture offrendo servizi innovativi e specializzati; la filiera agricola, dove, per esempio, è stato possibile avviare il Distretto dei Cereali, far dialogare le Organizzazioni produzione latte e discutere il da farsi dopo la chiusura del Centro Latte; la coesa filiera nel campo ambientale promossa da un gruppo di cooperative sociali e lavoro; la filiera del consumo con Best e l'iniziativa Carta Best, dove l'utente può fruire di una vasta gamma di offerte davvero ampia.

Stiamo aggredendo nuove frontiere: cooperative che riuniscono giovani professionisti nei campi più disparati, che si occupano del tema dell'energia, dell'ambiente, della valorizzazione del patrimonio culturale, che uniscono medici o ingegneri informatici.

Sono sicuro che la cooperazione di questa parte della campagna bresciana, che Cesare Correnti definiva un immenso deposito di fatiche, uno straordinario serbatoio di futuro

saprà valorizzare e sostenere l'esistente, sosterrà la formazione di reti e sistemi senza essere “invadente”, promuoverà la formazione, esigerà qualità dei servizi erogati, sarà instancabilmente propositiva percorrendo strade nuove rispettose di esperienze, persone, nel pieno rispetto dei valori della cooperazione.



## PRINCIPALI MODIFICHE FISCALI DELL'ANNO 2016

di Claudio Brunelli

**IRAP** - L'abolizione ha interessato tutti i contribuenti soggetti all'aliquota agricola dell'1,9%, ovvero tutte le aziende agricole indipendentemente dalla loro natura giuridica. Tale beneficio è diventato tangibile già nel mese di giugno in occasione del pagamento delle imposte evitando così rispetto all'anno precedente il versamento della 1° rata dell'acconto.

Permane l'IRAP ad aliquota ordinaria, che per la Lombardia è 3,9%, solo per alcune tipologie di attività legate all'agricoltura e più precisamente per:

- Allevamenti senza la copertura data dai terreni.
- Attività agrituristiche.
- Attività di produzione di energia elettrica eccedenti i limiti entro cui si applica la tassazione catastale.
- Attività connesse non rientranti nell'ambito della tassazione catastale, tra cui le attività connesse di prestazione di servizi agro meccanici.
- Produzione di vegetali su più piani produttivi (è il caso di alcune serre e fungaie).

**IMU** - Per quanto concerne l'Imposta Municipale Unica, meglio conosciuta come IMU, si segnala che la stessa

è stata abolita per i terreni (non rientranti fra quelli esenti per norma) "posseduti e condotti" da coltivatori diretti ed imprenditori agricoli professionali iscritti all'INPS. Tale beneficio è esteso ai terreni posseduti da CD o IAP e condotti da società agricole con qualifica di IAP.

**IVA** - Percentuali di compensazione. Si segnala l'innalzamento al 10% in via definitiva dell'aliquota IVA di compensazione per i latte. Diversamente per le carni bovine e suine le percentuali sono state portate rispettivamente al 7,65% e al 7,95% ma limitatamente all'esercizio 2016.

**IRPEF** - Nel settore "agro energie" si segnala l'assoggettamento del 25% del fatturato per la sola cessione di energia (esclusa tariffa incentivante) eccedente la soglia minima già ricompresa nella tassazione catastale.

Ai fini della tassazione catastale si evidenzia che sono stati rivalutati del 30% il reddito dominicale e il reddito agrario. Per i contribuenti coltivatori diretti o IAP l'aumento è stato contenuto al 10%.

**IMPOSTA DI REGISTRO** - Altro aumento di tassazione vede l'imposta di registro sulle compravendite di terreni, acquistati da soggetti non CD o IAP che passa dal 12% al 15%. Per le compravendite in ambito PPC si conferma la tassazione nella misura fissa dell'1%, estesa anche al coniuge e ai parenti conviventi in linea retta.

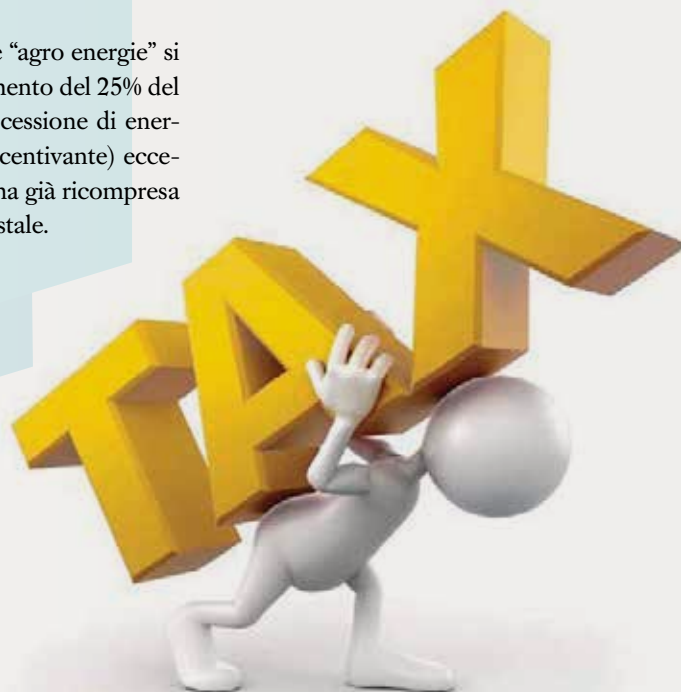

# MAIS DA GRANELLA E TRINCIATO: LE NOSTRE PROVE

di Sabbadini Maurizio

L'annata agraria 2016 per la coltivazione del mais è stata mediamente buona, ma non mancano dei punti di criticità in alcune zone. Un esempio, purtroppo, la presenza di aflatossine nelle granelle, in contro tendenza con le impressioni della stagione.

Le semine in molti areali del comprensorio sono state effettuate in modo adeguato, con prime semine abbastanza anticipate. Le piogge primaverili hanno aiutato l'emersione del mais e il funzionamento dei diserbanti di pre-emergenza, portando poi a intervenire in modo contenuto con gli erbicidi di post-emergenza sulle infestanti più resistenti.

Le frequenti piogge stagionali e la fioritura con clima piuttosto mite hanno permesso buone fecondazioni e produzioni elevate sia da trinciato sia da pastone e granella.

Una considerazione va fatta sul cambiamento climatico che porta con sé una più difficile identificazione dei cicli biologici degli insetti. Ciò nonostante sono stati pochi i casi di danno da diabrotica degni di attenzione, mentre il ciclo della piralide, quest'anno molto sfasato, si è risolto con una prima generazione nascosta e posticipata, con sfocio su una seconda e terza generazione che hanno destato qualche preoccupazione. In ogni caso, i mezzi adottati, tra geodisinfestante alla semina per il controllo di elateridi e diabrotica,

TABELLA 1: Danesi

| Ibrido       | Umidità | Peso ettolitrico | Ql Verde /Ha. | Ql al 14% Ha. | Rev. Med.test |
|--------------|---------|------------------|---------------|---------------|---------------|
| KEBEOS       | 20,6    | 74,8             | 192,47        | 177,70        | 177,70        |
| DKC 6664     | 21      | 72,4             | 213,77        | 196,37        | 198,52        |
| KONTIGOS     | 16,3    | 72,9             | 177,83        | 173,08        | 174,97        |
| MAS 64 P     | 14,9    | 78,4             | 163,56        | 161,85        | 163,62        |
| HYDRO        | 18,9    | 74,5             | 195,33        | 184,20        | 186,22        |
| LG 30597     | 16,1    | 76,7             | 175,19        | 170,91        | 172,79        |
| DKC 5830     | 15,1    | 78,6             | 188,42        | 186,01        | 188,05        |
| KWS 3563     | 17,5    | 75,2             | 186,43        | 178,85        | 180,81        |
| HATAY        | 18,6    | 74,8             | 168,36        | 159,35        | 161,10        |
| KEBEOS       | 21,1    | 75,5             | 194,59        | 178,53        | 178,53        |
| ZOAN         | 15      | 71,7             | 165,27        | 163,35        | 159,46        |
| DKC 6340     | 14,7    | 77,7             | 185,76        | 184,25        | 179,86        |
| KEFRANCOS    | 18,9    | 73,9             | 186,73        | 176,09        | 171,90        |
| P2088        | 19,2    | 76,9             | 196,77        | 184,87        | 180,47        |
| DKC 7050     | 22,4    | 73,9             | 204,93        | 184,91        | 180,51        |
| P1817        | 19,5    | 76,8             | 188,98        | 176,89        | 172,68        |
| DKC 6650     | 20,2    | 75,3             | 191,58        | 177,77        | 173,54        |
| KEBEOS       | 21,3    | 74,8             | 208,06        | 190,40        | 190,40        |
| KEBEOS       | 18,8    | 76,2             | 178,57        | 168,60        | 166,79        |
| P1570        | 16,7    | 78,6             | 181,93        | 176,22        | 174,33        |
| LG 30600     | 15      | 75,9             | 150,28        | 148,53        | 146,94        |
| KWS 2571     | 18,5    | 75,4             | 166,53        | 157,81        | 156,12        |
| P1672        | 16,3    | 80,5             | 177,59        | 172,84        | 170,99        |
| DKC 6752     | 20      | 78               | 190,90        | 177,58        | 175,67        |
| HELIUM       | 13,8    | 74,9             | 164,71        | 165,09        | 163,32        |
| MAS 68T      | 16,6    | 75,9             | 169,96        | 164,82        | 163,05        |
| ISTA H716    | 17,2    | 78,7             | 158,26        | 152,37        | 150,74        |
| MARVIN 6006  | 18,8    | 77,1             | 160,43        | 151,48        | 149,85        |
| KEBEOS       | 20,1    | 77,6             | 186,90        | 173,65        | 173,65        |
| LG 30692     | 18      | 74,6             | 174,10        | 166,00        | 164,22        |
| P1921        | 17,8    | 78,9             | 191,63        | 183,16        | 181,20        |
| DKC 6728     | 17      | 74,6             | 184,70        | 178,26        | 176,35        |
| KELINDOS     | 16,6    | 76,5             | 179,65        | 174,22        | 172,35        |
| Media        | 18,6    | 75,65            | 186,06        | 175,96        | 175,03        |
| Media tester |         |                  |               | 180,07        |               |

e il trattamento insetticida contro piralide e diabrotica, hanno salvaguardato le produzioni, sia in termini di quantità sia di qualità.

Come ogni anno Comab si è impegnata a effettuare campi sperimentali: due da granella e uno da trinciato. In tutti i casi il seme è stato seminato con aggiunta del geodisinfestante Force; il diserbo di pre-emergenza è stato fatto con una miscela di Merlin Flex e Aspect e il trattamento insetticida con Twin Pack. Il testimone, che si ripete più volte nei due campi, è il Kebeos e viene seminato per valutare il livello di uniformità dei terreni. Grazie a questo possiamo quindi calcolare la Revisione Media dei Test (ultima colonna a destra nelle tabelle dei mais da granella), che ci fornisce un dato produttivo nel quale vengono tolte le influenze del terreno.

#### CAMPI MAIS GRANELLA

Nella zona di Brescia, ci ha ospitato l'Az. Agr. Danesi Davide, Cascina Cà del Lupo, Montichiari. La semina è avvenuta il 18 Marzo, mentre la raccolta il 12 Settembre.

Nella zona di Mantova, ci ha ospitato l'Az. Agr. Bonometti Mauro, Cerlongo, Mantova. Data di semina: 25 Marzo; data di raccolta: 8 Settembre.

TABELLA 2: Bonometti

| Ibrido              | Umidità     | Peso ettolitrico | Ql verde /Ha. | Ql al 14% Ha. | Rev. Med.Test |
|---------------------|-------------|------------------|---------------|---------------|---------------|
| <b>KEBEOS</b>       | <b>21,1</b> | <b>70,4</b>      | <b>189,32</b> | <b>173,69</b> | <b>173,69</b> |
| P1570               | 19,7        | 73,4             | 192,31        | 179,56        | 173,57        |
| LG30600             | 21,7        | 74,8             | 179,49        | 163,42        | 157,97        |
| KWS 2571            | 24,1        | 73,4             | 198,17        | 174,89        | 169,06        |
| P1672               | 19,1        | 69,8             | 188,51        | 177,33        | 171,41        |
| DKC 6752            | 21,9        | 71,9             | 187,21        | 170,01        | 164,34        |
| SY HELIUM           | 18,5        | 69,9             | 173,37        | 164,30        | 158,82        |
| MAS 68T             | 19,7        | 69,2             | 188,12        | 175,65        | 169,79        |
| ISTA 716            | 22,5        | 69,1             | 182,47        | 164,44        | 158,95        |
| GUERRESI 6006       | 22,9        | 70,5             | 182,51        | 163,62        | 158,16        |
| <b>KEBEOS</b>       | <b>24,1</b> | <b>72</b>        | <b>199,60</b> | <b>176,16</b> | <b>176,16</b> |
| LG30692             | 24,1        | 72,8             | 197,20        | 174,04        | 173,55        |
| P1921               | 24,5        | 74,8             | 196,81        | 172,78        | 172,29        |
| DKC 6728            | 21,5        | 70,9             | 198,29        | 181,00        | 180,48        |
| KERIDOS             | 21,7        | 71               | 180,54        | 164,38        | 163,91        |
| P1817               | 20,7        | 71,2             | 185,37        | 170,93        | 170,44        |
| DKC 7050            | 26,5        | 70,1             | 185,39        | 158,44        | 157,99        |
| TEST 2088 1921      | 21,3        | 72               | 186,46        | 170,63        | 170,14        |
| KEFRANCOS           | 23,5        | 70,5             | 194,15        | 172,70        | 172,21        |
| DKC 5830            | 17,3        | 71,3             | 161,48        | 155,28        | 154,84        |
| SYZOAN              | 19,5        | 70,6             | 177,39        | 166,04        | 165,57        |
| <b>KEBEOS</b>       | <b>22,7</b> | <b>70,5</b>      | <b>181,33</b> | <b>162,98</b> | <b>162,98</b> |
| FITO' HATAY         | 21,5        | 69,9             | 172,25        | 157,23        | 162,85        |
| KWS 3563            | 19,9        | 71,9             | 174,98        | 162,97        | 168,80        |
| LG30597             | 18,1        | 70,7             | 157,86        | 150,33        | 155,71        |
| SY HYDRO            | 25,5        | 72,4             | 200,08        | 173,32        | 179,52        |
| MAS 64P             | 20,1        | 69,6             | 177,39        | 164,81        | 170,70        |
| KONTIGOS            | 18,5        | 72,8             | 166,42        | 157,71        | 163,35        |
| <b>KEBEOS</b>       | <b>20,5</b> | <b>70,8</b>      | <b>176,89</b> | <b>163,52</b> | <b>163,52</b> |
| <b>Media</b>        | <b>21,7</b> | <b>71,3</b>      | <b>185,99</b> | <b>169,11</b> | <b>166,92</b> |
| <b>Media tester</b> |             |                  |               | <b>169,09</b> |               |

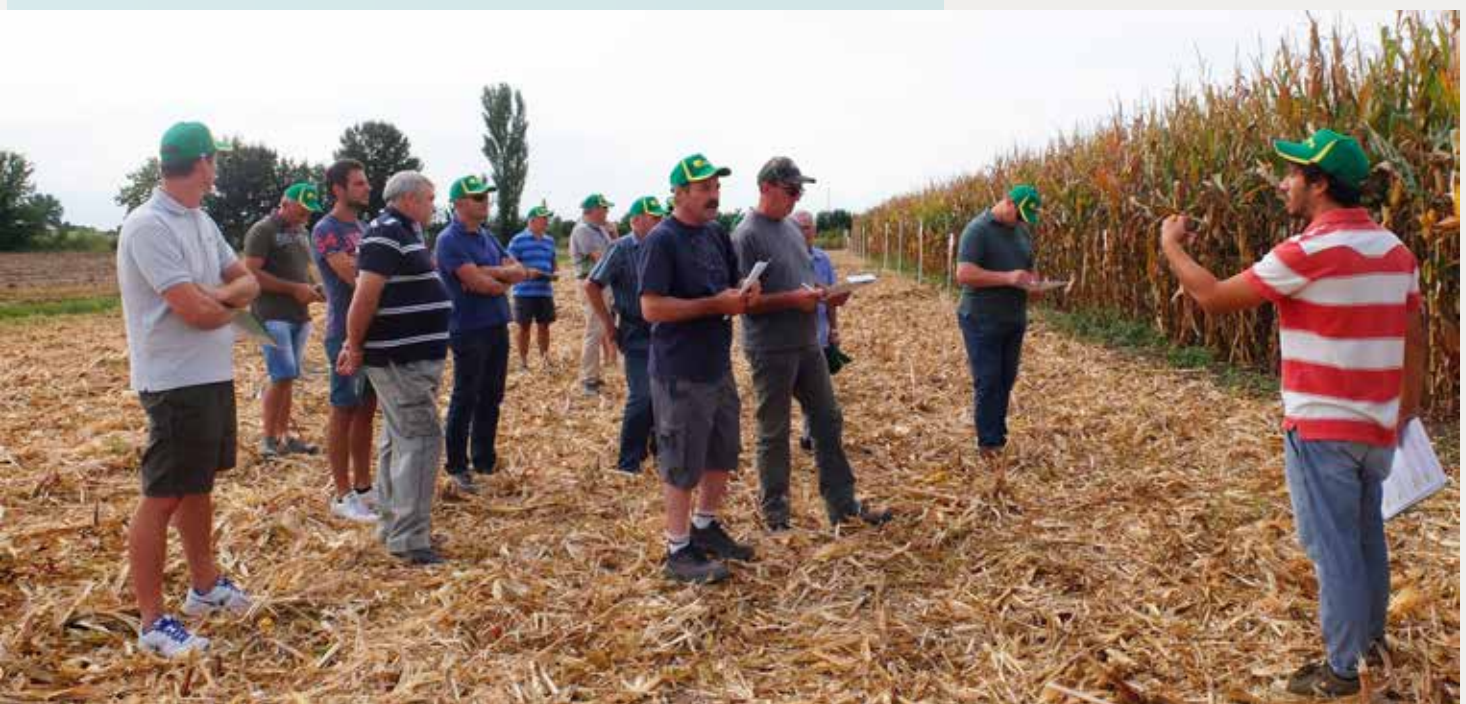

Nei due campi da granella possiamo notare come le produzioni siano state molto elevate, addirittura sopra i 150 quintali a ettaro e che gli ibridi più produttivi siano di diverse ditte sementiere, segno che tutte le aziende stanno investendo molto sulla genetica.

### CAMPO MAIS TRINCIATO

Ci ha ospitato l'Az. Agr. Rizzetti Massimo, Montichiari

(BS). Il campo è stato seminato il 7 Aprile e raccolto il 26 Agosto. Le produzioni medie di trinciato sono state di 542 quintali per ettaro, in linea con quelle della zona.

Ringraziamo Danesi Davide, Bonometti Mauro e Rizzetti Massimo che hanno collaborato con noi e che si sono resi disponibili a ospitare i nostri campi varietali. Ringraziamo inoltre le aziende contoterzi Belloni flli, Bresciani e Bonometti Marco per le raccolte.

**TABELLA 3:** Rizzetti

| Ibrido        | Ql verde /Ha. | S.S./Ha      | S.S.%         | Amido       | Fibra Grezza | N.D.F.      | A.D.F.      | A.D.L.     |
|---------------|---------------|--------------|---------------|-------------|--------------|-------------|-------------|------------|
|               | Q.li          | Q.li         | alla raccolta | %           | %            | %           | %           | %          |
| P2088         | 602,4         | 262,5        | 43,6          | 44,9        | 12,6         | 27,9        | 18,2        | 2,1        |
| LG 30703      | 519,7         | 233,1        | 44,9          | 37,9        | 17,7         | 38,0        | 26,3        | 2,5        |
| SYVERDEMAX    | 512,3         | 216,7        | 42,3          | 37,2        | 18,6         | 39,2        | 29,6        | 2,9        |
| KOLOSSEUS     | 542,0         | 210,5        | 38,8          | 29,4        | 20,4         | 41,7        | 30,7        | 2,8        |
| MAS78T        | 632,8         | 263,6        | 41,7          | 38,5        | 17,4         | 37,0        | 24,4        | 2,5        |
| DKC7050       | 491,6         | 211,5        | 43,0          | 39,6        | 16,0         | 35,0        | 26,0        | 2,3        |
| ISH714        | 559,5         | 217,2        | 38,8          | 35,7        | 18,1         | 38,4        | 27,6        | 2,5        |
| SY QUALITAT   | 501,8         | 218,2        | 43,5          | 34,6        | 17,4         | 37,9        | 26,7        | 2,7        |
| GUERRESI 7002 | 515,5         | 249,7        | 48,5          | 43,0        | 14,2         | 31,9        | 21,6        | 2,2        |
| <b>Media</b>  | <b>542,0</b>  | <b>256,1</b> | <b>46,0</b>   | <b>43,9</b> | <b>13,4</b>  | <b>29,9</b> | <b>19,9</b> | <b>2,1</b> |

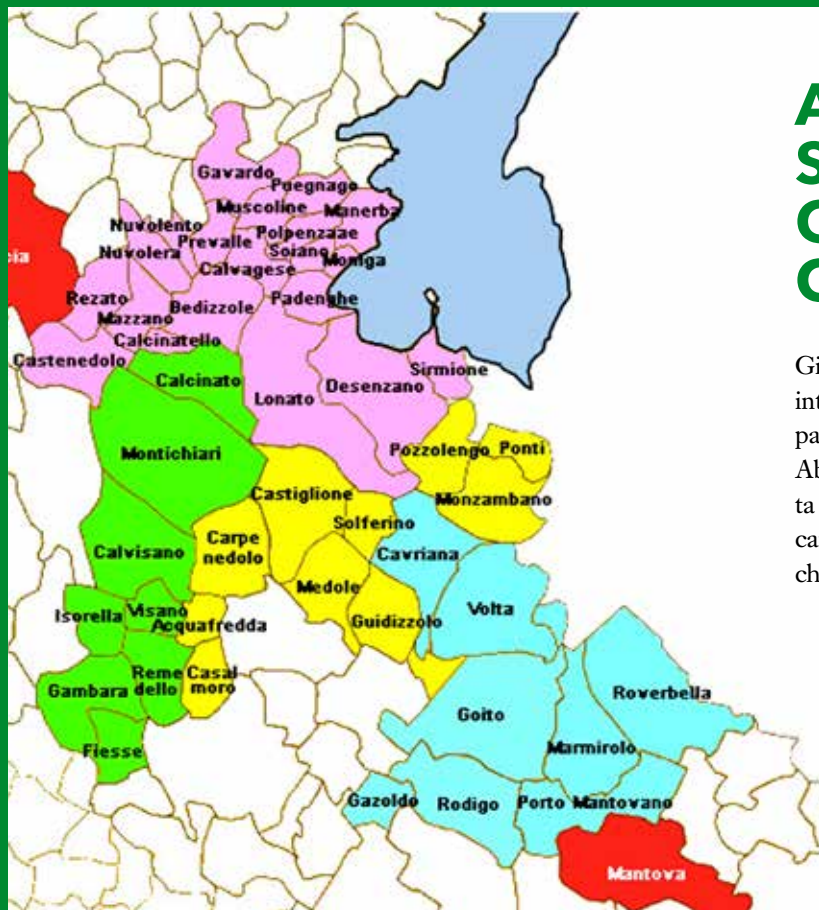

## ABBIAMO SOSTITUITO GIANNI CON GIANNI

Gianni Sposato forse non ci abbandonerà del tutto, ma intanto abbiamo trovato un altro Gianni. Beltrami fa parte della nostra squadra da inizio anno.

Abbiamo, di conseguenza, ridisegnato ancora una volta le zone di competenza dei tecnici come appare in cartina, anche se potete rivolgervi senza problemi a chi volete.

**Simona:**  
331.6662721

**Gianni B:**  
348.3826298

**Maurizio:**  
331.3149494

**Vladmir:**  
335.331036

# LA FASE DI RISTALLO NELL'ALLEVAMENTO DEL BOVINO DA CARNE

Gestione dei ristalli: ambienti, strutture, alimentazione e profilassi.

di **Maurizio Cartapati**  
e **Paolo Malizia**

Il radicale cambiamento di ambiente e di alimentazione che attende i ristalli al loro arrivo deve essere affrontato nel modo migliore per ridurre al minimo i danni legati alla fase più critica dell'allevamento del bovino da carne. L'obiettivo è di permettere agli animali di arrivare nelle migliori condizioni ad affrontare un ciclo di allevamento intensivo.

È quindi uno dei momenti più importanti nell'allevamento dei vitelloni e rappresenta il periodo minimo necessario (21-28 giorni) a preparare gli animali alla successiva fase di ingrasso.

Ogni azienda deve predisporre un proprio protocollo di gestione del ristallo avvalendosi delle competenze del Veterinario aziendale e dell'alimentarista. Il programma deve essere specifico per gli animali di ogni razza e provenienza in arrivo nell'azienda.

Nonostante la sua importanza questa fase viene alcune volte trascurata dall'allevatore anche se diversi studi uni-

versitari e l'assistenza tecnica della Comazoo verso i propri soci dimostrano sempre di più come la morbilità (comparsa di patologie) e la mortalità in questo breve periodo siano rispettivamente circa l'80 e il 60% dell'intero ciclo di allevamento.

L'adattamento alle nuove condizioni ambientali, sociali e alimentari rappresenta quindi un momento molto critico in grado di scatenare, se mal gestito, reazioni fisiologiche e psichiche che in qualche soggetto ne può compromettere lo stato di benessere e di salute. Sono comunque processi multifattoriali che si possono generare in tutte le fasi (stressanti) della vita del vitello come lo svezzamento, il carico, il trasporto, lo scarico, la struttura e l'ambiente del ristallo, i trattamenti profilattici e sanitari praticati all'arrivo, le interazioni sociali, l'alimentazione, ecc.

Vediamo più in particolare i principali aspetti da esaminare e valutare per ottimizzare il ristallo - **Tabella 1**.

**TABELLA 1:** Fattori esterni che influenzano l'adattamento dei vitelloni

| PRIMA DEL TRASPORTO                        | DURANTE IL TRASPORTO            | DOPO IL TRASPORTO                  |
|--------------------------------------------|---------------------------------|------------------------------------|
| Svezzamento e gestione dei bovini          | Durata del trasporto            | Personale (rapporto uomo-animale)  |
| Stato nutrizionale dei soggetti            | Densità dei soggetti            | Procedure di scarico               |
| Interazioni sociali                        | Restrizione idrica e alimentare | Gestione sanitaria dei soggetti    |
| Microbismo e comfort ambientale            | Interazioni sociali             | Omogeneità dei gruppi              |
| Tempo di permanenza nei centri di raccolta | Clima                           | Gestione nutrizionale dei soggetti |
|                                            |                                 | Interazioni sociali                |
|                                            |                                 | Operazioni effettuate sui bovini   |
|                                            |                                 | Tipologia strutturale delle stalle |
|                                            |                                 | Microbismo e comfort ambientale    |
|                                            |                                 | Clima                              |

## SCelta DEGLI ANIMALI

L'esatta conoscenza della provenienza degli animali è importante per ottenere i migliori risultati nell'allevamento intensivo dei vitelloni. Oltre all'area geografica di partenza è utile conoscere la gestione alimentare e i trattamenti profilattici e sanitari a cui sono stati sottoposti i vitelli nelle loro aziende di origine.

Nel nostro paese sono normalmente importati bovini svezzati dalla Francia in maggioranza di razze da carne Charolaise, Limousine, Aubrac, Salers, Blonde d'Aquitaine (Garronesi), ecc. incroci francesi, e di altri paesi europei come Blue Belga, ecc. Le due razze comunemente allevate in Italia sono le prime due di cui vengono, ristallati due tipi di animali: i broutarde allevati al pascolo e poi ristallati all'età di 6-8 mesi al peso di 300 kg circa e i broutarde reposes allevati con due cicli di pascolo e poi ristallati all'età di 14-16 mesi al peso di 450-500 kg.

I principali fattori stressanti che interessano gli animali prima dell'arrivo nell'azienda da ingrasso sono rappresentati dal carico degli animali nei pascoli, il loro rimescolamento nei centri di raccolta, gli eventuali trattamenti, il trasporto e le nuove e diverse interazioni sociali in un così breve lasso di tempo.

## STRUTTURE

### E AMBIENTI PER IL RISTALLO

Sono da preferire strutture leggere, ariose, con molto spazio (almeno 4,5 m<sup>2</sup> per capo sia all'aperto sia al chiuso), con adeguato (uguale o meglio superiore al numero di animali) spazio in mangiatoia, con disponibilità di notevoli quantitativi di acqua mediante abbeveratoi a livello e non a spinta, con lettiera permanente con molta paglia (almeno 20 cm) e poste a debita distanza dalle strutture adibite all'ingrasso, in modo da isolare gli animali di nuovo ingresso dagli altri già presenti in allevamento.

In questo ambiente (pulito, deterso e disinfettato) si deve rispettare il "tutto pieno-tutto vuoto" e tra una partita e l'altra il vuoto deve essere di

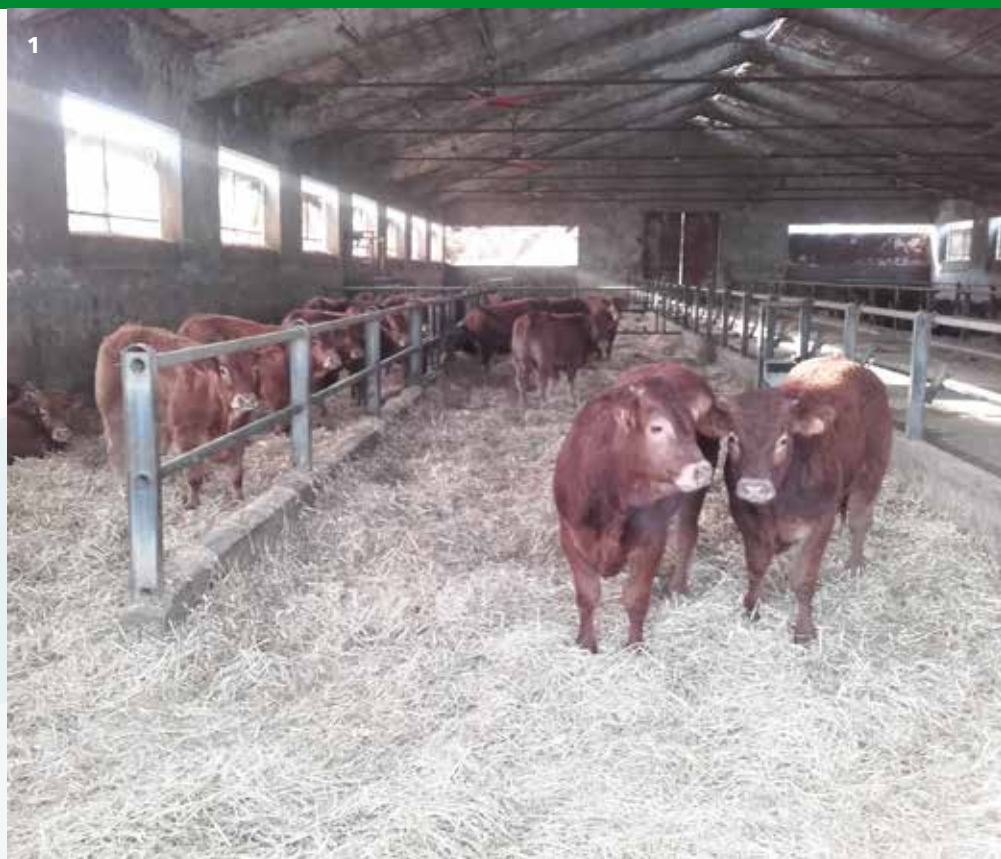

almeno 10-15 giorni.

Gli animali subiscono in questo breve periodo interventi di tipo gestionale, profilattico e sanitario necessari ma molto stressanti. È quindi indispensabile predisporre adeguate zone di contenimento quasi sempre costituite da lunghi corridoi delimitati da barriere in ferro adiacenti o all'interno del capannone da ristallo in cui poter trattare i soggetti nel modo meno doloroso possibile e nella totale sicurezza del personale. Disporre di auto catturanti nella zona adibita a mangiatoia è molto funzionale a questo scopo. Molto utile avere un box infermeria isolato in cui poter alloggiare e curare gli animali ammalati.

Tutti gli ambienti utilizzati per il ristallo vanno analizzati secondo i criteri del benessere animale garantendo quindi il massimo di comfort in modo da avere la minore interazione negativa con la salute animale - **Foto 1 e 2.**

### PRIMI INTERVENTI ALL'ARRIVO

All'arrivo degli animali si deve procedere, se possibile, alla formazione di piccoli (ognuno con 10 soggetti al massimo) gruppi omogenei per peso, razza, età, partita e sesso.

La restrizione alimentare e idrica, inevitabile durante il trasporto, comporta un minor volume del ruminante,

una riduzione come frequenza e durata delle contrazioni ruminali causa di minore mobilità, transito e turnover ruminale e quindi un'alterazione della popolazione microbica in quantità e qualità variabile in relazione alla durata della restrizione stessa. Come conseguenza avremo un ridotto supporto energetico e plastico per le principali funzioni organiche, un ridotto apporto di nutrienti per fondamentali processi fisiologici e immunologici, un'alterazione dell'equilibrio elettrolitico organico e naturalmente un'intensa mobilitazione delle riserve organiche (grassi) con possibile formazione di corpi chetonici e un'ulteriore depressione dell'appetito.

Le alterazioni digestive che si verificano con il trasporto possono compromettere fino al 75% e per un periodo superiore ai 3 giorni la capacità fermentativa ruminale dei soggetti di nuovo arrivo (Huthcenson and Cole, 1990).

Il condizionamento alimentare dei ristalli presenta caratteristiche in gran parte ampiamente codificate, quali l'impiego di reidratanti nell'acqua di abbeverata in relazione alla durata del viaggio (per viaggi brevi e quindi stress di minore intensità è sufficiente acqua e sale allo 0,9%), somministra-

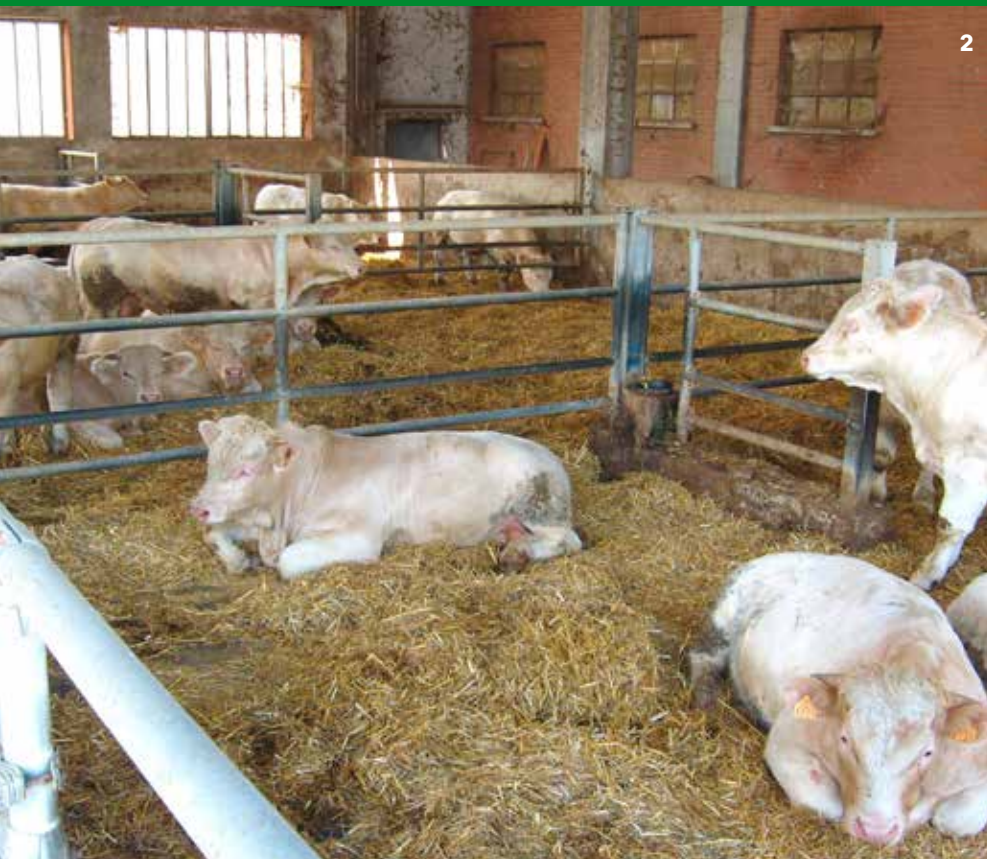

2

do diverse analisi e studi sono molto frequenti negli animali importati) e malattie parassitarie da ectoparassiti (esterni all'ospite e quindi sulla cute) come artropodi (ipodermosi da larva di *Hypoderma bovis*, acari che provocano diversi tipi di rogna, pidocchi) e micosi.

A tutti questi rischi sanitari bisogna rispondere con interventi manageriali, profilattici e terapeutici, tipici di ogni protocollo aziendale redatto dal Medico Veterinario.

L'attenuazione di uno stato di stress dovuto al trasporto, al cambio di ambiente, alla formazione di nuovi gruppi, ecc. consente l'instaurarsi di una più solida immunità vaccinale.

I parassiti sono uno dei fattori immunodepressori più rilevanti per cui dovrebbero essere eliminati prima di vaccinare gli animali. Per motivi di praticità si tende comunque ad effettuare tutte le operazioni sui singoli capi in un unico momento; oltre alla vaccinazione e all'eliminazione dei parassiti vi è anche la somministrazione di antibiotici in relazione all'osservazione degli animali da parte dell'allevatore e alla visita veterinaria.

In linea generale i trattamenti sanitari all'arrivo posti in essere (protocollo) dal Veterinario aziendale devono riguardare la profilassi vaccinale per le malattie respiratorie, dell'apparato digerente e le enterotossiemie; si deve inoltre valutare la necessità di trattamenti antiparassitari e antibatterici.

All'arrivo in azienda degli animali l'allevatore deve effettuare un attento controllo visivo per individuare gli animali più in crisi e quindi che tendono ad isolarsi, presentano tosse, scolo nasale e respirazione superficiale; su questi soggetti si deve controllare immediatamente la temperatura e poi trattarli in base al protocollo terapeutico impostato dal Medico Veterinario.

Solo il rispetto di questi fondamentali processi gestionali può portare a risultati eccellenti, tecnici ed economici, nell'intero ciclo di allevamento dei vitelloni.

zione di fieno a volontà almeno nei primi 7 giorni, mangime da ristallo (da 1 kg/capo/giorno dal 2° giorno dall'arrivo per arrivare a 3-4 kg nella prima settimana di condizionamento). È da preferire il sistema di alimentazione unifeed somministrata ad libitum con parametri specifici (0,8-0,9 UFC e 12-13% PG). Infine cauta e graduale introduzione di insilati e/o razioni da ingrasso per l'ultima settimana del periodo. A tale proposito è importante sapere da dove arrivano gli animali: se provengono dal pascolo la transizione al regime alimentare da ingrasso dovrà essere particolarmente accorta e graduale, mentre se provengono dalla stalla si potrà concentrare la razione in modo più rapido.

L'acqua di abbeverata nei primi momenti dovrà essere preferibilmente tiepida in autunno-inverno visto la sua abbondante e rapida assunzione subito dopo l'arrivo; fornire comunque acqua a volontà è fondamentale per stimolare l'assunzione di sostanza secca, impedire un eccessivo calo di peso ed evitare all'animale un'ulteriore fonte di stress.

Un abbeveratoio ben funzionante deve erogare circa 7 litri al minuto; un gruppo di 30 animali beve in me-

dia circa 32 litri/capo/giorno (20° C di temperatura) impiegando un tempo totale di 137 minuti circa (2h e 17 min); se l'erogazione fosse di 1 litro al minuto impiegherebbero 960 minuti pari a 16h: nessun soggetto rimane 7-10 minuti all'abbeveratoio per bere.

### **PROFILASSI VACCINALE ED EVENTUALE TERAPIA ANTIBIOTICA**

L'importazione di vitelli da ristallo prevalentemente francesi allevati al pascolo porta con sé anche l'introduzione nei nostri allevamenti di parassiti, batteri e virus, con notevoli rischi sanitari che si riflettono successivamente sul reddito dell'allevatore.

La principale problematica sanitaria nell'allevamento del bovino da ingrasso è rappresentata dalla patologia respiratoria, molto impattante sul reddito aziendale in quanto determina elevata mortalità, vendita d'urgenza di animali non finiti, diminuzioni delle performance di accrescimento e aumento dei costi profilattici e terapeutici.

Le altre problematiche sanitarie sono dovute alla diarrea virale bovina, alle malattie parassitarie da endoparassiti (interni all'ospite) come i nematodi, trematodi, protozoi (i coccidi secon-

# CORRETTA SOMMINISTRAZIONE DEL LATTE IN POLVERE

di **Sonia Rumi**

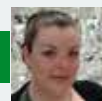

Per ottenere un accrescimento ottimale e vitelli sani è necessario avviare subito dopo la nascita un programma di alimentazione molto preciso. Un miglior accrescimento permette di anticipare la fecondazione e conseguentemente l'età al primo parto. Tutto ciò in ultima analisi determina una mandria con vacche da latte con una carriera produttiva più lunga e una produzione di latte aumentata del 6-10%.

## La chiave è il colostro

Il primo passo è somministrare precocemente 4-6 litri di colostro appena munto. Nei 3 giorni seguenti i vitelli hanno un fabbisogno preciso in proteine ed energia, per riprendersi dal parto e iniziare a crescere. Per questo necessitano di circa 6 litri di colostro al giorno, somministrato 3 volte al giorno in ragione di circa 2 litri per volta.

## Utilizzare una elevata concentrazione di polvere di latte

Dopo 3 giorni di colostro, i vitelli possono facilmente essere avviati alla somministrazione di latte in polvere. Esso deve essere preparato ad una concentrazione ottimale, vale a dire 1 kg di latte in polvere e 6 litri di acqua = 7 litri di latte, somministrato in ragione di 2 litri due volte al giorno. Per soddisfare al meglio le necessità dei vitelli, in particolare durante le prime 2 settimane di vita, è necessario mettere in atto un programma alimentare dettagliato, in modo tale che il vitello riesca ad ingerire abbastanza alimen-

**TABELLA 1:** Programma di somministrazione con alimentazione a secchio

| ETÀ          | COLOSTRO L/DIE | NOTE                                                                             |
|--------------|----------------|----------------------------------------------------------------------------------|
| 1° giorno    | 6 litri        | Somministrare 4 litri entro un ora dalla nascita + 2 litri entro 12-18 ore.      |
| 2° giorno    | 6 litri        | Da somministrare in 3 pasti.                                                     |
| 3° giorno    | 6 litri        | Passaggio dal colostro al LATTE IN POLVERE.                                      |
| ETÀ          | LATTE L/DIE    | NOTE                                                                             |
| 4°-7° giorno | 6 litri        | Da somministrare in 3 pasti alla concentrazione di 150 gr/ 0,850 l. di acqua.    |
| 2° sett.     | 6 litri        | Da somministrare in 2 pasti. Iniziare la somministrazione di mangime STARTER.    |
| 3° sett.     | 7 litri        | Oltre al mangime STARTER iniziare la somministrazione di FIENO di buona qualità. |
| 4° sett.     | 7 litri        | Mangime STARTER + FIENO di buona qualità.                                        |
| 5° sett.     | 7 litri        | Mangime STARTER + FIENO di buona qualità.                                        |
| 6° sett.     | 6 litri        | Mangime STARTER + FIENO di buona qualità.                                        |
| 7° sett.     | 4 litri        | Mangime STARTER + FIENO di buona qualità.                                        |
| 8° sett.     | 4 litri        | Mangime STARTER + FIENO di buona qualità.                                        |
| 9° sett.     | 2 litri        | SVEZZARE il vitello. L'assunzione di mangime deve essere di 1-1,5kg / die.       |

**TABELLA 2:** Programma di somministrazione con allattatrice automatica

| ETÀ           | COLOSTRO L/DIE | NOTE                                                                          |
|---------------|----------------|-------------------------------------------------------------------------------|
| 1° giorno     | 6 litri        | Somministrare 4 litri entro un ora dalla nascita + 2 litri entro 12-18 ore.   |
| 2° giorno     | 6 litri        | Da somministrare in 3 pasti.                                                  |
| 3° giorno     | 6 litri        | Passaggio dal colostro al LATTE IN POLVERE.                                   |
| ETÀ           | LATTE L/DIE    | NOTE                                                                          |
| 4°-7° giorno  | 6 litri        | Da somministrare in 3 pasti alla concentrazione di 125 gr/ 0,875 l. di acqua. |
| 8°-14° giorno | 6 litri        | Da somministrare in 2 pasti. Iniziare la somministrazione di mangime STARTER. |

## SPOSTAMENTO ALL'ALLATTATRICE AUTOMATICA

| ETÀ         | LATTE L/DIE    | PASTI | NOTE                                                                             |
|-------------|----------------|-------|----------------------------------------------------------------------------------|
| 3° sett.    | 6-7 litri      | 4     | Oltre al mangime STARTER iniziare la somministrazione di FIENO di buona qualità. |
| 4°-5° sett. | 7 litri        | 4     | Mangime STARTER + FIENO di buona qualità.                                        |
| 6°-9° sett. | da 7 a 1 litro | 3     | SVEZZARE il vitello. L'assunzione di mangime deve essere di 1-1,5kg / die.       |



**TABELLA 3:** Programma di somministrazione con alimentazione a monopasto

| ETÀ             | COLOSTRO L/DIE | NOTE                                                                                              |
|-----------------|----------------|---------------------------------------------------------------------------------------------------|
| 1° giorno       | 6 litri        | Somministrare 4 litri entro un ora dalla nascita + 2 litri entro 12-18 ore.                       |
| 2° giorno       | 6 litri        | Da somministrare in 3 pasti.                                                                      |
| 3° giorno       | 6 litri        | Passaggio dal colostro al LATTE IN POLVERE.                                                       |
| ETÀ             | LATTE L/DIE    | NOTE                                                                                              |
| 4°-14° giorno   | 2 litri        | Diluire 500 gr di polvere in 1,5 litri di acqua. Iniziare la somministrazione di mangime STARTER. |
| 3°-7° settimana | 3 litri        | Diluire 750 gr di polvere in 2,25 litri di acqua. Iniziare la somministrazione di FIENO.          |
| 8° settimana    | 2 litri        | Diluire 500 gr di polvere in 1,5 litri di acqua.                                                  |
| 9° settimana    | 1 litro        | SVEZZARE il vitello. L'assunzione di mangime deve essere di 1-1,5kg / die.                        |

to per rispettare i suoi fabbisogni alimentari. È consigliabile somministrare il latte ricostituito in quantità tale da fornire almeno 500-750 grammi di polvere al giorno; in questo modo è possibile ottenere il miglior accrescimento ponderale e raggiungere uno stato di salute ottimale.

#### L'OFFERTA DI COMAZOO

- **Zoo Latte Spray**

È un latte contenente il 56% di polvere di latte magro. Caratterizzato da un eccellente apporto nutrizionale grazie all'elevata

percentuale di proteine del latte.

- **Zoo Latte Benefit**

È un latte in polvere ad elevato contenuto di prodotti lattiero caseari. Prodotto a partire da sieri di elevata qualità, contiene unicamente proteine di origine lattiero casearia.

- **Zoo Latte Unico**

È una polvere di latte magro al 40% formulata per una somministrazione a monopasto. La fonte proteica è rappresentata da caseine e proteine del siero.

- **Vantaggi:**

- Notevole risparmio di manodopera;
- Lettiera che si mantiene asciutta più a lungo;
- Minori problemi di diarree;
- Vitelli più vitali perché alla sera si coricano con l'abomaso semi vuoto;
- Precoce sviluppo del rumine a causa della maggiore assunzione di mangime;
- Maggiore e costante accrescimento dopo lo svezzamento;
- Nessun calo ponderale dopo lo svezzamento.

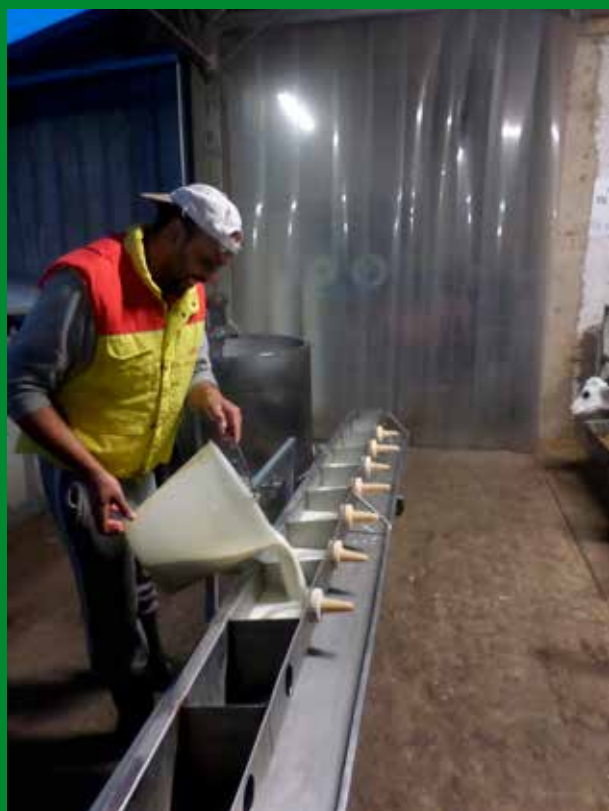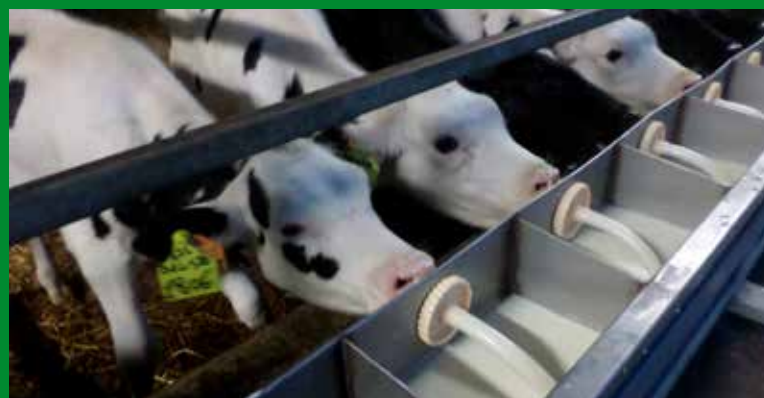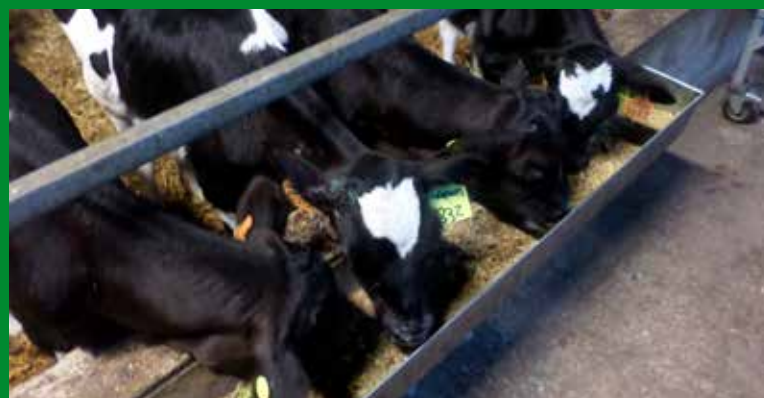

# PNEUMATICI INVERNALI: NON SOTTOVALUTARE IL FREDDO

di Davide Floris

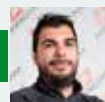

Anche quest'anno l'inverno è alle porte ed è buona norma dotare la propria autovettura di pneumatici invernali, a prescindere dalle condizioni meteorologiche. Anche perché l'articolo 6 del Codice della Strada rende possibile per le amministrazioni locali introdurre l'obbligo sulle strade di propria competenza. E' certamente un passo avanti per la sicurezza stradale ma, come spesso accade, ci sono alcuni aspetti che le norme non chiariscono.

Bisogna innanzitutto sfatare un luogo comune: gli pneumatici invernali, detti anche lamellari, da neve o termici, non servono solo quando si viaggia su strade innevate, questo tipo di pneumatico, grazie alle proprietà della miscela a base di silice, alla struttura specifica e al disegno del battistrada caratterizzato da incavi più profondi e dalle "lamelle", migliora sensibilmente l'aderenza del veicolo ogni qualvolta la temperatura ambientale scende al di sotto dei 7° C ed indipendentemente dalle condizioni del fondo stradale. Nei mesi più freddi dell'anno gli pneumatici invernali garantiscono pertanto una maggiore aderenza, a prescindere dalla presenza di neve o ghiaccio sull'asfalto. Rispetto ad un pneumatico estivo, gli spazi di frenata si riducono del 20% se l'asfalto è asciutto, del 30 quando è bagnato e fino al 50% quando è ricoperto di neve. Gli pneumatici invernali si riconoscono dal fiocco di neve racchiuso nel profilo di una montagna stilizzata

sulla spalla, ovvero sul fianco esterno dello pneumatico.

Ricordatevi che acquistando ed utilizzando degli pneumatici invernali aumenterete almeno del 40% la vita utile del treno di gomme estive. Sulla

carta di circolazione sono indicate le misure con marcatura M+S, le misure con marcatura M+S sono riservate ai pneumatici invernali, ma non sono vincolanti: essi si possono montare di qualsiasi altra dimensione presente nella carta di circolazione.

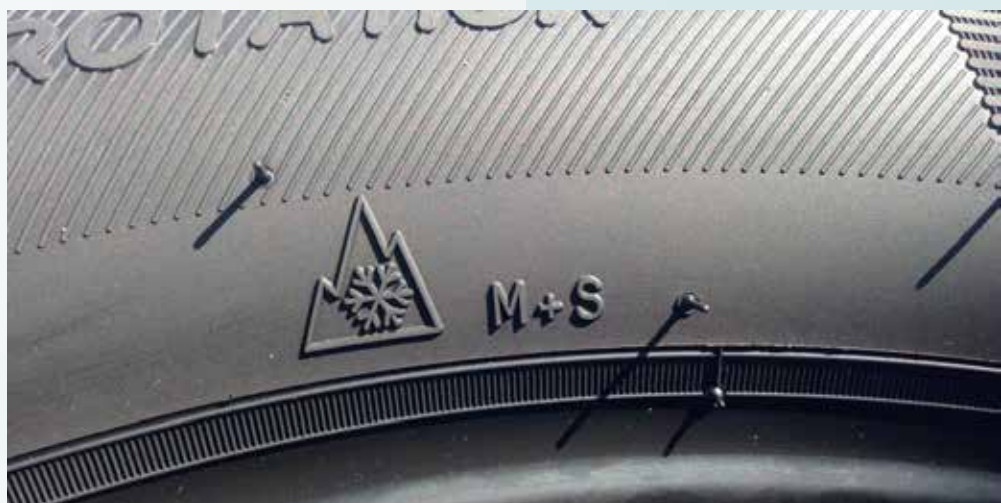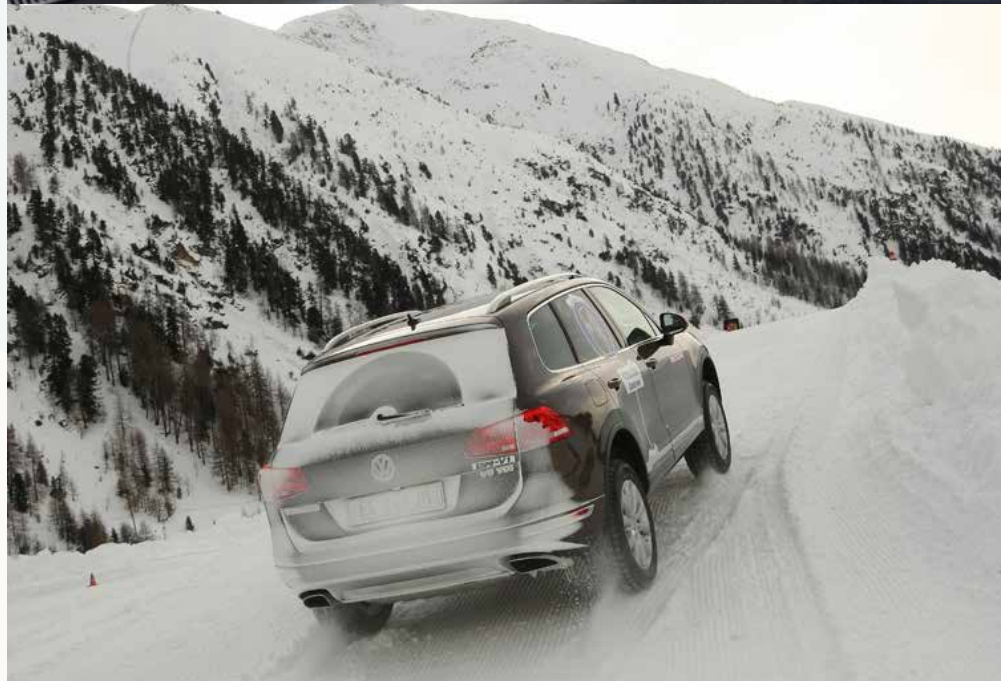

Per i pneumatici invernali si possono montare indici di velocità inferiore rispetto a quello indicato sul libretto infatti è prevista una deroga sul codice di velocità, ma non sull'indice di carico, che può essere perciò inferiore a quello indicato nella carta di circolazione, purché maggiore o uguale a "Q" (160 km/h). Non c'è una regola che indica il momento giusto per montare i pneumatici invernali, perché contano le condizioni ambientali e meteorologiche nonché l'uso che si fa della vettura. Tuttavia, a parte l'ovvio rispetto delle eventuali ordinanze locali, è bene passare alle gomme invernali ad autunno inoltrato e tornare alle estive quando la temperatura supera stabilmente i 15° C. A questo proposito, ricordiamo che è sbagliato

e controproducente utilizzare i pneumatici invernali quando fa caldo, perché in tali condizioni le prestazioni degli estivi sono decisamente migliori e il battistrada delle invernali si usura molto rapidamente.

Un errore frequente è quello di confondere le gomme M+S per degli pneumatici invernali. Tali coperture, montate spesso sui SUV e crossover, sono in grado di offrire prestazioni migliori su fondi viscidici rispetto a gomme tradizionali, ma non sono paragonabili a delle coperture invernali per il livello di aderenza garantito su strada. La contraddizione è che l'attuale Codice della Strada equipara infatti le M+S alle invernali. Chi monta quindi delle M+S è esonerato dagli eventuali obblighi di viaggiare con catene a bordo piuttosto che di montare degli pneumatici invernali, sappiate però che ai fini della vostra sicurezza non sono affatto la stessa cosa. Per il Codice l'alternativa all'uso delle gomme termiche sarebbe quello di viaggiare con le catene da neve a bordo.

L'equiparazione normativa non ha molto senso, perché le catene sono dei dispositivi d'emergenza, da montare solo nel caso in cui vi sia un certo strato di neve o ghiaccio sulla sede stradale, perché altrimenti si danneggiano facilmente.

Le catene si applicano sulle ruote motrici. Il problema è, che su molte vetture moderne caratterizzate da grandi cerchi in lega, le catene non si possono utilizzare, le automobili cosiddette "non catenabili" per via dello spazio ridotto tra la gomma e passaruota. Per capire se il Costruttore della vostra auto ammette l'uso delle catene dovete controllare il libretto di circolazione. Esistono altri equipaggiamenti che assolvono in parte la funzione degli pneumatici invernali o delle catene. Molti soci avranno sentito parlare delle cosiddette "calze" o "autosock", ovvero delle reti in materiale elastico con cui si rivestono le ruote motrici. Sono facili da installare, efficaci per far guadagnare trazione all'auto in caso di neve, ma non sono riconosciute dal Codice della Strada e quindi si possono usare solo in caso di emergenza, anche perché a contatto con l'asfalto si lacerano in fretta.

Un altro dispositivo non omologato sono le catene spray o liquide, delle composizioni chimiche di consistenza schiumosa o collosa da applicare sul battistrada. Costano molto poco, ma si dissolvono dopo poco chilometri e non sono comunque riconosciute dal Codice della Strada. L'obbligo di pneumatici invernali o catene deve essere segnalato tramite l'apposito segnale su sfondo blu (il disegno della gomma catenata), mentre l'obbligo di catene a bordo o gomme invernali montate, va segnalato mediante un altro cartello. In caso di violazione, si incorre in una sanzione pecuniaria e in condizioni estreme le forze dell'ordine potrebbero impedirvi di proseguire la marcia. Agricom consiglia ai propri associati il montaggio degli pneumatici invernali, che vi permettono di viaggiare sicuri, evitando di incorrere in multe, vi aspettiamo in cooperativa per maggiori informazioni, preventivi e ricordiamo che sono disponibili diverse misure in offerta.

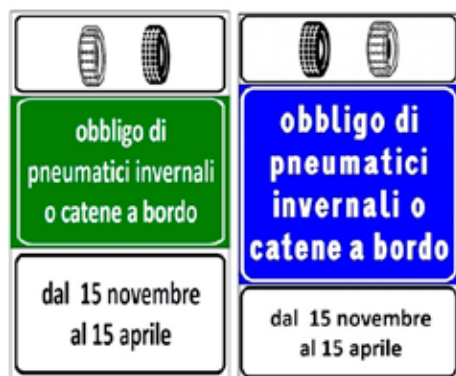

LEGGI - ORDINANZE - OBBLIGHI

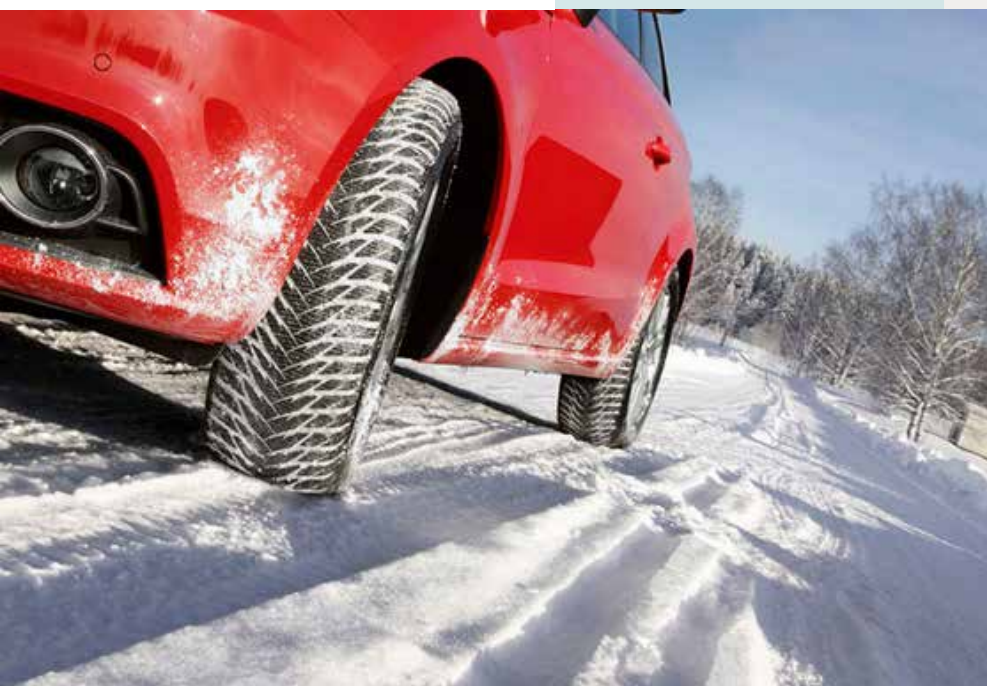

# BILANCIO DI FINE ANNO

di Maurizio Zani

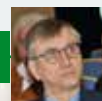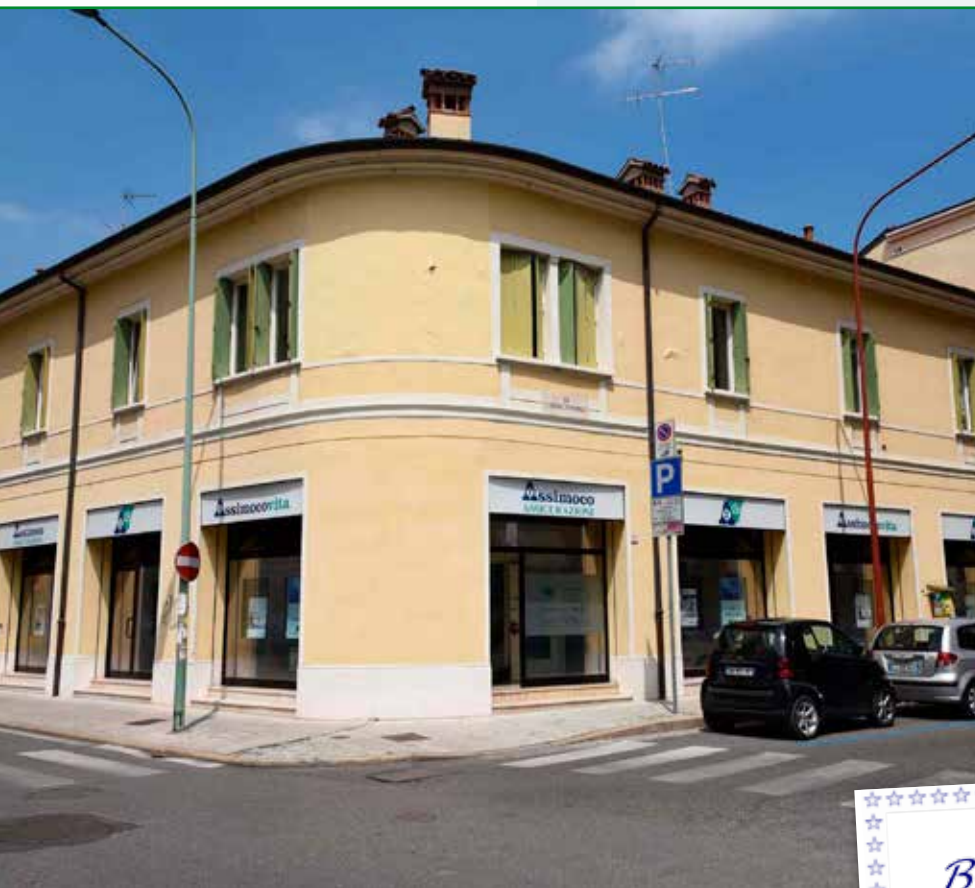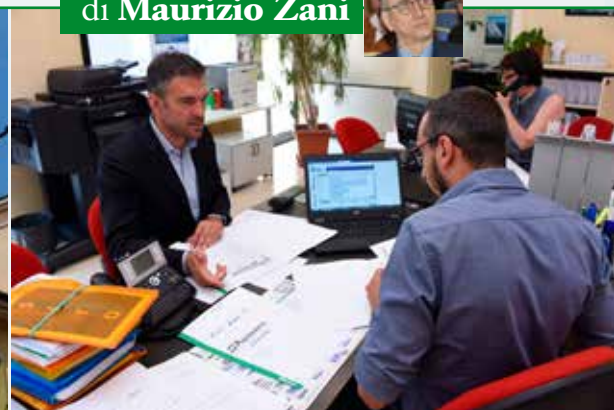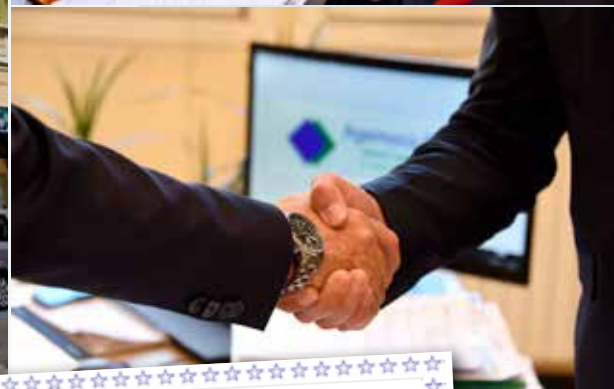

Per Agemoco Brescia il 2016 è stato un anno molto impegnativo, volevamo raggiungere obiettivi che ci permettessero di dare migliori risposte ai bisogni dei soci cooperatori tutti, ma ancor più ai soci del mondo agricolo. Siamo riusciti a proporre condizioni speciali su alcuni prodotti, ad avviare una campagna di analisi dei bisogni e a concludere il percorso per ottenere un ulteriore mandato di collaborazione con la compagnia ITAS ASSICURAZIONI, già vicina al mondo cooperativo da affiancare ai mandati già esistenti con ASSIMOCO, ARAG, VH, BCC ASSICURAZIONI. Per il futuro vogliamo condividere il vostro motto del “fare” e riuscire sempre più ad essere efficaci ed efficienti nell'erogazione dei nostri servizi.

A tutti voi e alle vostre famiglie i nostri più sinceri auguri di un sereno Natale e per un 2017 ricco di soddisfazioni.

*Buon Natale  
2016*

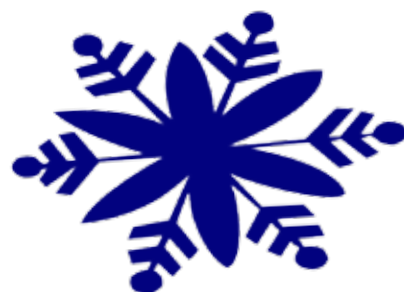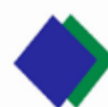

**Agemoco Brescia**  
servizi assicurativi per  
il mondo cooperativo

## CONVENZIONE TRATTORI PER I SOCI

Agemoco Brescia Srl - Via Ferramola, 30 Brescia Tel 030-3776972 - Via Santellone, 37 Montichiari tel 0309981321 email : info@agemoco.it

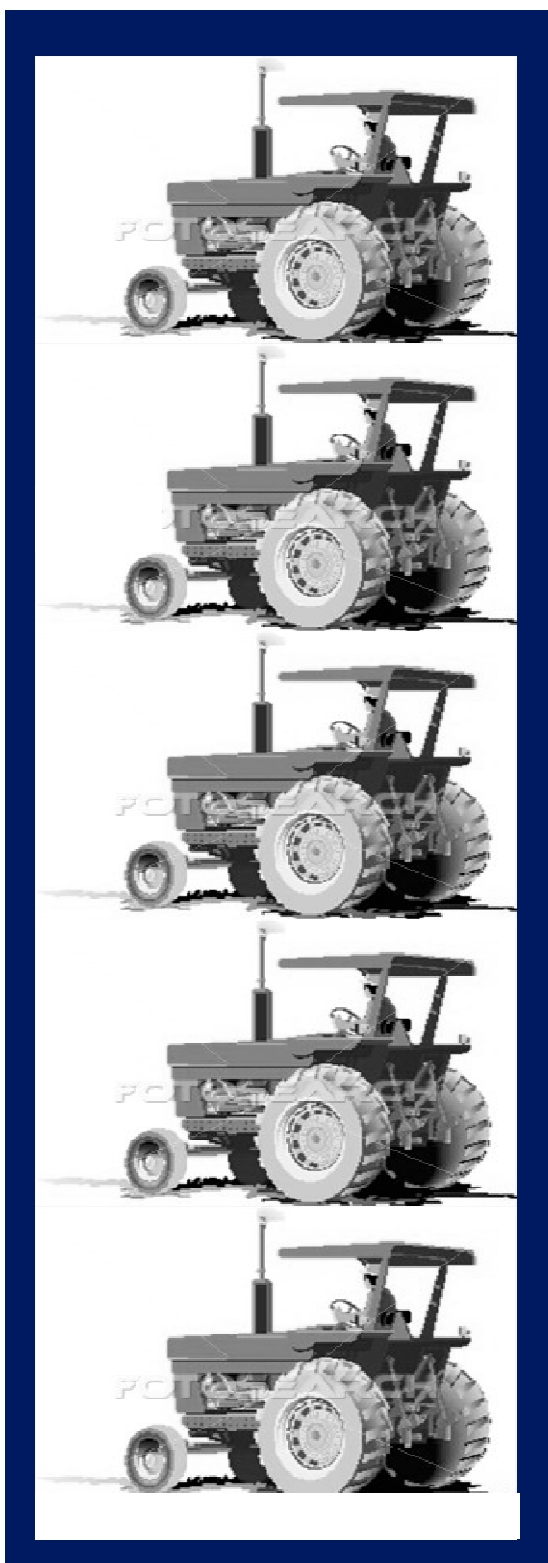

La Vostra Agenzia, **AGEMOCO BRESCIA**, ha stipulato una nuova esclusiva **CONVENZIONE** con **ASSIMOCO**, la Compagnia del nostro Movimento Cooperativo, specifico per la copertura Rcauto obbligatoria dei **TRATTORI**

# Premio annuo 70,00\* euro

\*Su provincia di Bs massimale 6.000.000.

Fermo il premio della convenzione il massimale garantito in polizza potrà variare in base alla provincia dell' intestatario del libretto di circolazione

Se sei Socio e sei interessato all' offerta rivolgiti ai nostri uffici e verrai subito messo in contatto con uno dei nostri consulenti

I nostri Consulenti saranno a Tua disposizione per ulteriori chiarimenti sulla Convenzione Trattori. Inoltre Ti potranno informare anche sugli altri Prodotti Assicurativi studiati per il Gruppo Cis e dei quali potrai beneficiare in qualità di Socio

# Agenda

## appuntamenti e corsi

DICEMBRE  
2016

5 dicembre - **Corso aggiornamento abilitazione utilizzo trattore** (4h con autocertificazione) presso ComANove a Chiari (BS)

12 dicembre - **VISITA FABBRICA MERLO** iscrizioni entro il 7 dicembre (vedi pag. 10)

17 dicembre - **FESTA DI NATALE CIS**

GENNAIO  
2017

Gennaio - **Comab**: riunioni di zona a Brescia e Mantova

12 gennaio - **Teoria corso abilitazione utilizzo Telescopico e/o Muletto** presso Agricam

17 gennaio - **Corso aggiornamento abilitazione utilizzo trattore** (4h con autocertificazione) presso Agricam

18 gennaio - **Pratica corso abilitazione utilizzo Telescopico e/o Muletto** presso Agricam

23 gennaio - **Corso aggiornamento abilitazione utilizzo trattore** (4h con autocertificazione) presso Agricam

26 gennaio - **VISITA FABBRICA MERLO** iscrizione entro il 23 gennaio (vedi pag. 10)

26 gennaio - **Corso patente/abilitazione trattore** presso Agricam

30 gennaio - **Corso patente/abilitazione trattore** presso Agricam

31 gennaio e 1 febbraio - **VISITA FABBRICA SILOKING** iscrizione entro il 20 gennaio (vedi pag. 7)

FEBBRAIO  
2017

17-19 febbraio - **Fiera agricola Zootecnica Italiana** presso Centro fiera di Montichiari

18-19 febbraio - **OPEN DAY AGRICAM** con la compartecipazione di Comab

MARZO  
2017

7 e 8 marzo - **VISITA FABBRICA SILOKING** iscrizione entro il 24 febbraio (vedi pag. 7)

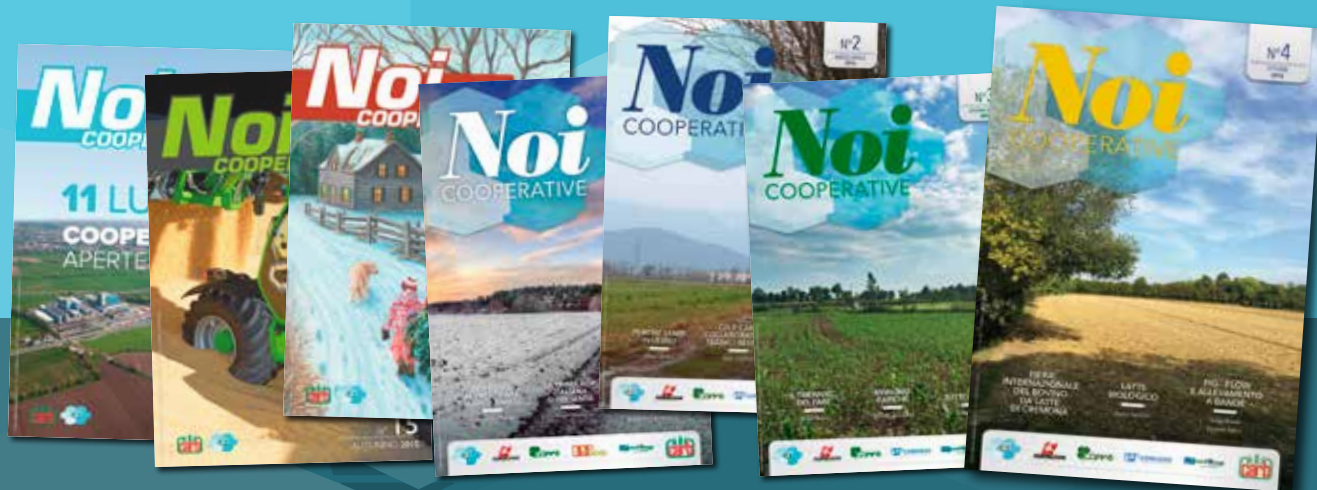

È possibile richiedere copie in più del "NOI COOPERATIVE"! Mandare la richiesta via mail a [pucci@agricam.it](mailto:pucci@agricam.it) con:

NOME - COGNOME - INDIRIZZO - INTESTAZIONE AZIENDA AGRICOLA

# SIMA

26 FÉV. > 02 MARS 2017

Paris Nord Villepinte - France

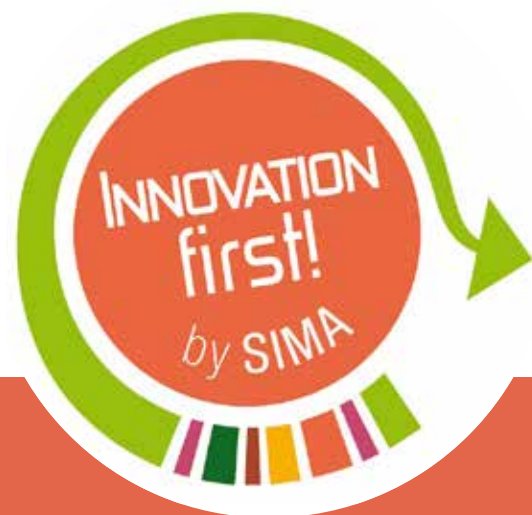

## 26 - 27 FEBBRAIO 2017

*Caro Socio non perdere l'occasione di visitare una tra la fiere agricole più importanti del mondo. Agricam ha organizzato 2 giorni al "SIMA" la fiera agricola mondiale di PARIGI.*

**DISPONIBILI 30 POSTI - DURATA 2 GIORNI**

### PROGRAMMA:

#### Primo giorno - domenica 26 febbraio 2017:

- Volo da milano su Parigi
- Visita città di Parigi
- Pernottamento in hotel

#### Secondo giorno - lunedì 27 febbraio 2017:

- Intera giornata dedicata alla visita della fiera Sima.
- Tardo pomeriggio rientro con volo su Milano

## 400,00 €

QUOTA PARTECIPAZIONE A PERSONA\*

La quota comprende i trasferimenti da e per aeroporto, volo A/R, Pernottamento in hotel una notte in camera doppia (supplemento di € 50,00 per singola) con colazione, cena del primo giorno, visita di Parigi, biglietto ingresso fiera.

**ISCRIZIONE TASSATIVA ENTRO IL 27 GENNAIO 2017**

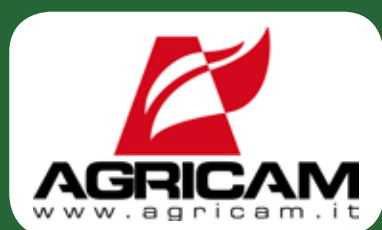

### ISCRIZIONI:

Tel. 030/961185 - Cell. 333/1766369

pucci@agricam.it

zappettini@agricam.it

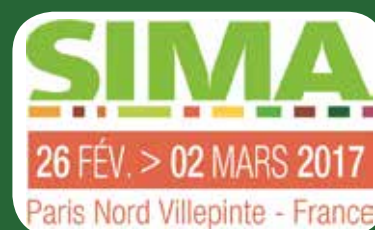

# CORSO PATENTE PER TRATTORI, TELESCOPICI E MULETTI

**Abilitazione degli operatori di attrezzature di lavoro**

*In attuazione dell'art. 73, comma 5 del d.Lgs. 81/2008 e successive modifiche e integrazioni, secondo l'accordo stato-regioni 22/02/2012 che prevede l'obbligo di effettuare i corsi.*

## CORSO DI FORMAZIONE

**AGGIORNAMENTO TRATTORISTI (4 ORE)**

rilascio attestato specifico

**TELESCOPICI e MULETTO (12 ore)**

Con rilascio dell'attestato di abilitazione

**MODULO TEORICO + MODULO PRATICO SPECIFICO**

### TRATTORE (8 ORE):

1 ora Modulo **GIURIDICO NORMATIVO**

2 ore Modulo **TECNICO E PROVA INTERMEDIA**

5 ore Modulo **TRATTORI A RUOTE: VALUTAZIONE  
FINALE E PROVA PRATICA**

**a 100 € + IVA**

**CORSO 26 GENNAIO 2017**  
**CORSO 30 GENNAIO 2017**

Durata corso trattore: 1 giorno

### AGGIORNAMENTO TRATTORE (4 ORE):

Corso di aggiornamento per persone con  
l'autocertificazione del'esperienza di utilizzo trattore

**a 45 € + IVA**

**Corsi: 5 dicembre 2016** presso Com.A.Nove di Chiari (BS)

**17 Gennaio 2017** presso Agricam

**23 Gennaio 2017** presso Agricam

### TELESCOPICO - MULETTO (12 ORE):

1 ora Modulo **GIURIDICO NORMATIVO**

7 ore Modulo **TECNICO E PROVA INTERMEDIA**

4 ore Modulo **PRATICO: VALUTAZIONE FINALE E  
PROVA PRATICA**

**a 100 € + IVA**

**12 GENNAIO** teoria - **18 GENNAIO** pratica

### SEDE DEL CORSO:

Agricam S.c.r.l.

Via Bornate 1, 25018 MONTICHIARI (BS)

Per iscrizioni 030/961185 oppure pucci@agricam.it



## Fino esaurimento scorte

### OFFERTA "CARDANI"

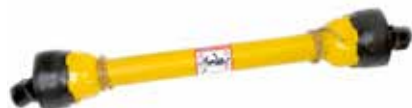

00960 - CARDANO CAT. B2 L 1200 € 63,00  
01723 - CARDANO CAT. B4 L 1200 € 65,00  
01732 - CARDANO CAT. B6 L 1200 € 77,00  
00996 - CARDANO CAT. B8 L 1200 € 107,00

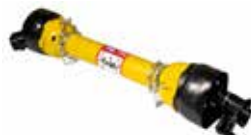

09095 - CARDANO CON BULLONE TRANCIO  
CAT.4 NM1700 L 1000 € 109,00

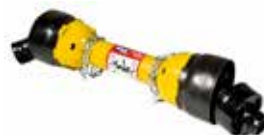

01725 - CARDANO CON RUOTA LIBERA  
CAT. B4 NM1600 L 1000 € 119,00

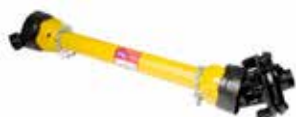

19969 - CARDANO CON FRIZIONE  
CAT. B6 NM1200 L 1000 € 148,00

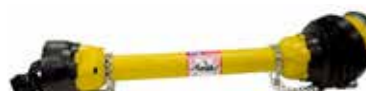

59906 - CARDANO OMOCINETICO  
CAT. B4 sing. L 1200 € 237,00

59903 - CARDANO OMOCINETICO  
CAT. B6 sing. L 1000 € 249,00

### CARDANI CON ATTACCHI STANDARD 1'3/8 Z6

Possibilità di preventivi e ordini di cardani su misura e categoria

### OFFERTA "POMPE TRAVASO"

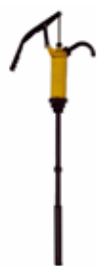

POMPA  
TRAVASO OLIO  
A 49€+IVA

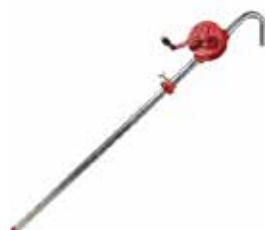

KIT TRAVASO  
ROATTIVO MANUALE  
A 22€+IVA

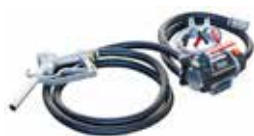

POMPA TRAVASO  
GASOLIO  
A 130€+IVA

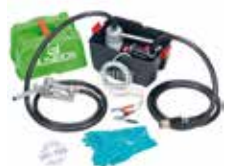

PIUSIBOX CON POMPA  
TRAVASO E CONTENITORE  
A 185€+IVA

### ADDITIVI PER L'INVERNO

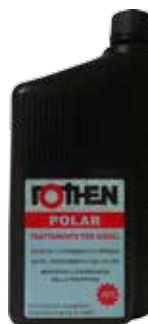

ANTI-GELO:  
ADDITIVO PER PARAFFINA  
DOSAGGIO:  
1 LT OGNI 1000LT  
A 7.5€/LT + IVA

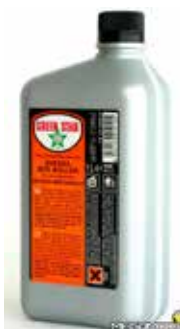

DIESEL BIO KILLER:  
ADDITIVO PER ALGA  
DOSAGGIO:  
- MANTENIMENTO: 1 LT OGNI  
10.000 LT  
- D'URTO: 1 LT OGNI 5.000LT  
- MASSIMO: 1 LT OGNI 2.000LT  
A 25€/LT + IVA

### BATTERIE D'ALTA QUALITÀ

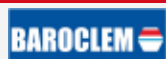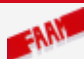

**SCONTO 10%**  
SU TUTTA LA GAMMA DA 44-200 AH  
GARANITTE 1 ANNO

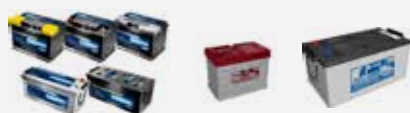

### FILTRI

FILTRI PER TUTTI I MODELLI DI TRATTORI  
DELLE MIGLIORI QUALITÀ

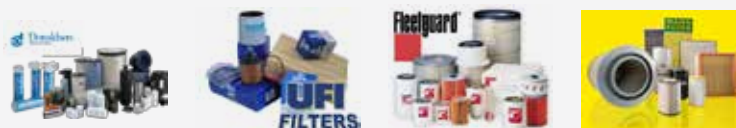

CONSEGNA IN AZIENDA GRATUITA CON LA CONSEGNA DEL GASOLIO

**AGRICAM S.c.r.l.**

Via Bornate, 1 - Montichiari (BS) - Tel. 030/9960900 - Fax 030/9658888 - www.agricam.it

**Fino esaurimento scorte**

## COLTELLI TRINCIASTOCCHI MULTIMARCA

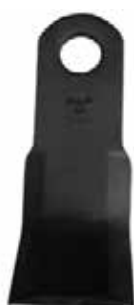

303.00.19

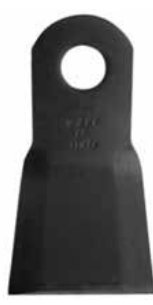

303.0012

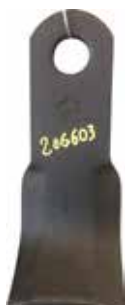

206603

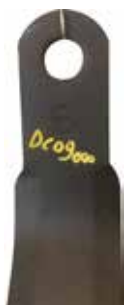

DC09000

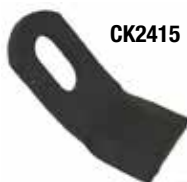

CK2415

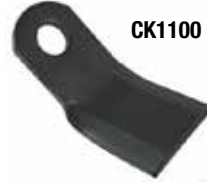

CK1100

| CODICE   | MISURE COLTELLI TRINCIASTOCCHI          | PREZZI iva esclusa |
|----------|-----------------------------------------|--------------------|
| 303,0012 | PIATTO 60X8 FORO 25,5 LARG 60 LUNG 140  | € 2,50             |
| 303,0019 | PIATTO 50X10 FORO 16,5 LARG 50 LUNG 200 | € 2,90             |
| CK1100   | PIATTO 60X10 FORO 25,5 LARG 60 LUNG 150 | € 2,90             |
| CK2415   | PIATTO 40X8 FORO 17-35 LARG 38 LUNG 100 | € 1,96             |
| DC0900   | PIATTO 60X8 FORO 25,5 LARG 55 LUNG 205  | € 2,10             |
| 206603   | PIATTO 60X10 FORO 25,5 LARG 55 LUNG 200 | € 2,40             |

## DENTI ERPICE

### TUTTI I TIPI DI DENTI

PORTA IL TUO CAMPIONE IN MAGAZZINO - disponibile anche viteria necessaria

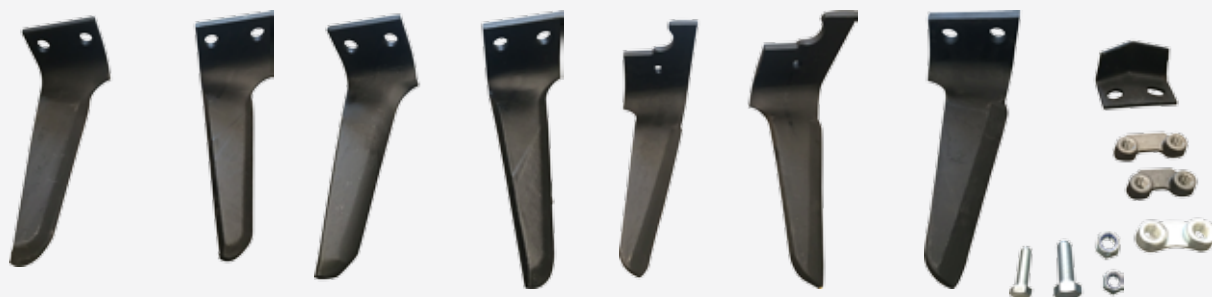

## COLTELLI CARRI MISCELATORI

### DISPONIBILI COLTELLI UNIVERSALI PER CARRI MISCELATORI VERTICALI

- disponibile anche viteria -

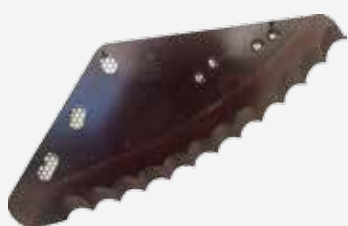

Coltello BUSATIS **67.50€** + IVA

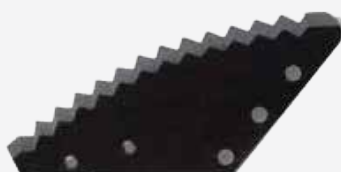

Coltello TUNGSTENO  
a partire da **30€** per quantità

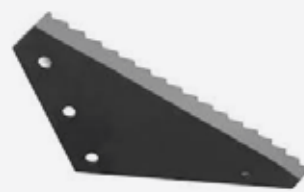

Coltello TUNGSTENO  
a partire da **29€** per quantità

## ZAPPETTE

**ZAPPA  
PER  
ESTIRPATORE**  
a **3.55€** + IVA  
cad.

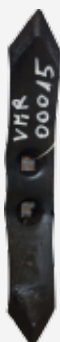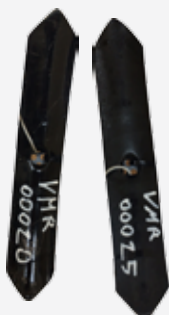

**MOLLA FLEX  
SARCHIATRICE**  
a **1.35€** + IVA cad.  
**+ MOLLA FLEX  
SARCHIATRICE**  
a **1.85€** + IVA cad.

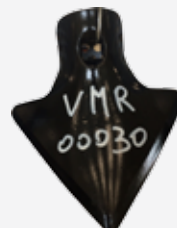

**ZAPPETTA  
MISURA 105**  
a **1.75€** + IVA cad.

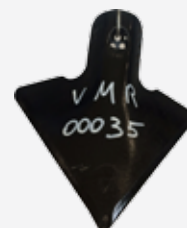

**ZAPPETTA  
MISURA 150**  
a **2.10€** + IVA cad.

**CONSEGNA IN AZIENDA GRATUITA CON LA CONSEGNA DEL GASOLIO**

**AGRICAM S.c.r.l.**

Via Bornate, 1 - Montichiari (BS) - Tel. 030/9960900 - Fax 030/9658888 - www.agricam.it

promozione pneumatici invernali fino al 31/12/2016

## RIVENDITORE UFFICIALE BRIDGESTONE

|                      |                          |                   |
|----------------------|--------------------------|-------------------|
| <b>185/60R15 84T</b> | <b>BRIDGESTONE LM001</b> | <b>€ 75 I.C.</b>  |
| <b>185/65R15 88T</b> | <b>BRIDGESTONE LM001</b> | <b>€ 72 I.C.</b>  |
| <b>195/65R15 91T</b> | <b>BRIDGESTONE LM001</b> | <b>€ 73 I.C.</b>  |
| <b>205/55R16 91H</b> | <b>BRIDGESTONE LM001</b> | <b>€ 105 I.C.</b> |
| <b>225/45R17 91H</b> | <b>BRIDGESTONE LM001</b> | <b>€ 145 I.C.</b> |

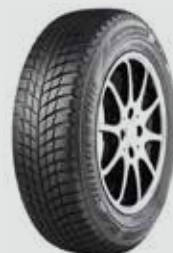

BRIDGESTONE LM-001

## RIVENDITORE UFFICIALE FIRESTONE

|                      |                          |                   |
|----------------------|--------------------------|-------------------|
| <b>185/60R15 84T</b> | <b>FIRESTONE W/HAWK3</b> | <b>€ 69 I.C.</b>  |
| <b>185/65R15 88T</b> | <b>FIRESTONE W/HAWK3</b> | <b>€ 66 I.C.</b>  |
| <b>195/65R15 91T</b> | <b>FIRESTONE W/HAWK3</b> | <b>€ 67 I.C.</b>  |
| <b>205/55R16 91H</b> | <b>FIRESTONE W/HAWK3</b> | <b>€ 95 I.C.</b>  |
| <b>225/45R17 91H</b> | <b>FIRESTONE W/HAWK3</b> | <b>€ 129 I.C.</b> |

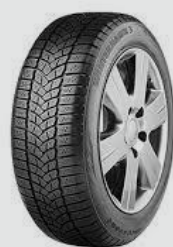

FIRESTONE WINTERHAWK3

## RIVENDITORE UFFICIALE MICHELIN

|                      |                          |                   |
|----------------------|--------------------------|-------------------|
| <b>195/65R15 91T</b> | <b>MICHELIN ALPIN A5</b> | <b>€ 81 I.C.</b>  |
| <b>205/55R16 91H</b> | <b>MICHELIN ALPIN A5</b> | <b>€ 116 I.C.</b> |
| <b>225/45R17 91H</b> | <b>MICHELIN ALPIN A5</b> | <b>€ 156 I.C.</b> |

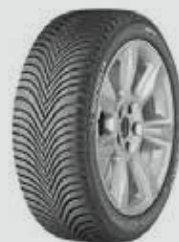

MICHELIN ALPIN 5

## OFFERTA CONTINENTAL

|                      |                          |                   |
|----------------------|--------------------------|-------------------|
| <b>185/60R15 84T</b> | <b>CONTINENTAL TS860</b> | <b>€ 86 I.C.</b>  |
| <b>185/65R15 88T</b> | <b>CONTINENTAL TS860</b> | <b>€ 82 I.C.</b>  |
| <b>195/65R15 91T</b> | <b>CONTINENTAL TS860</b> | <b>€ 79 I.C.</b>  |
| <b>205/55R16 91H</b> | <b>CONTINENTAL TS860</b> | <b>€ 116 I.C.</b> |
| <b>225/45R17 91H</b> | <b>CONTINENTAL TS860</b> | <b>€ 155 I.C.</b> |

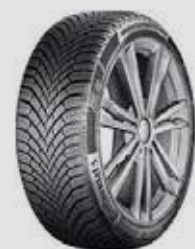

CONTINENTAL TS860

### Fino ad esaurimento scorte

I prezzi sopra indicati sono per pneumatico, compresi di Iva, montaggio, bilanciatura elettronica, sostituzione valvole e contributo smaltimento pneumatici PFU (decreto n.82 11 Aprile 2011).

**GIRO GOMME  
ESTIVO - INVERNALE  
€ 25 Iva Compresa**

**DEPOSITO GRATUITO**

## PNEUMATICI A STOCK

|                      |                                    |                  |                |
|----------------------|------------------------------------|------------------|----------------|
| <b>155/65R14 75T</b> | <b>KLEBER KRISHALP2 (DOT2014)</b>  | <b>€ 48 I.C.</b> | <b>Disp. 4</b> |
| <b>155/80R13 79T</b> | <b>MICHELIN ALPIN A3 (DOT2014)</b> | <b>€ 70 I.C.</b> | <b>Disp. 4</b> |
| <b>165/65R14 79T</b> | <b>KLEBER KRISHALP (DOT2014)</b>   | <b>€ 60 I.C.</b> | <b>Disp. 4</b> |
| <b>175/65R14 82T</b> | <b>CONTINENTAL TS850 (DOT2014)</b> | <b>€ 70 I.C.</b> | <b>Disp. 4</b> |
| <b>185/60R14 82T</b> | <b>CONTINENTAL TS800 (DOT2012)</b> | <b>€ 55 I.C.</b> | <b>Disp. 4</b> |
| <b>195/65R15 91T</b> | <b>CONTINENTAL TS850 (DOT2014)</b> | <b>€ 65 I.C.</b> | <b>Disp. 8</b> |

I prezzi sopra indicati sono per pneumatico, compresi di Iva, montaggio, bilanciatura elettronica, sostituzione valvole e contributo smaltimento pneumatici PFU (decreto n.82 11 Aprile 2011).

Per INFO e PREVENTIVI contattare:

**FLORIS DAVIDE** - Responsabile assistenza Pneumatici 030.9960900 – 3391096672 – floris@agricam.it

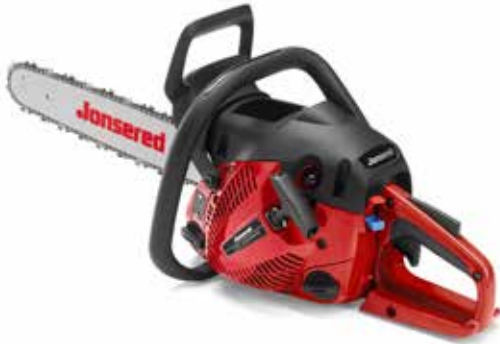

**JONSERED CS 2234**

38 cc / 1,4 kW / 14" / 4,7 kg

--- a **199,00 €** ---

**JONSERED CS 2238**

38 cc / 1,5 kW / 16" / 4,7 kg

--- a **229,00 €** ---

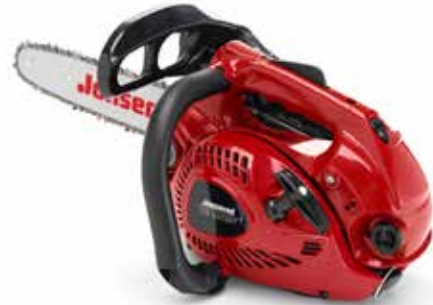

**JONSERED CS 2236T**

35,2 cc / 1,5 kW / 12" / 3,4 kg

--- a **359,00 €** ---

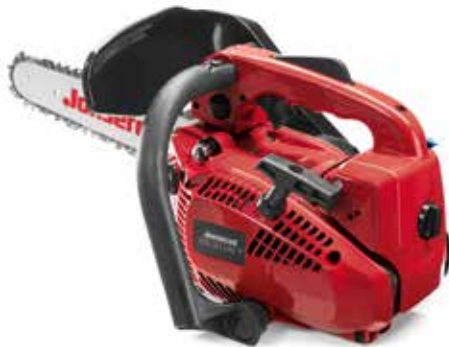

**JONSERED CS 2125T - CS2125TC**

25,4 cc / 1.0 kW / 10" / 3,0 kg

--- a **349,00 €** ---

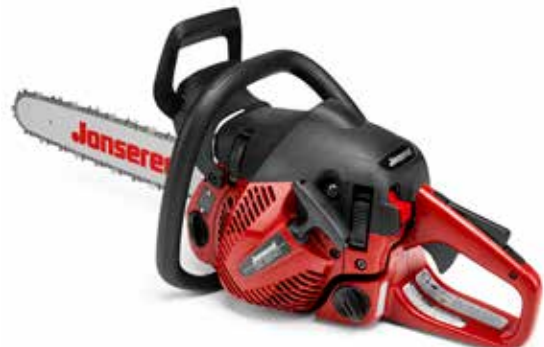

**JONSERED CS 2240II**

40,9 cc / 1,8 kW / 15" / 4,4 kg

--- a **329,00 €** ---

**JONSERED CS 2245II**

45,7 cc / 2,1 kW / 15" / 4,9 kg

--- a **399,00 €** ---

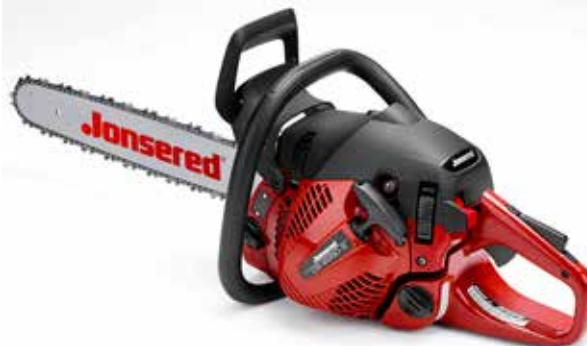

**JONSERED CS 2250SII**

50,2 cc / 2,4 kW / 18" / 5,1 kg

--- a **469,00 €** ---

**JONSERED CS 2255**

55,5 cc / 2,6 kW / 18" / 5,8 kg

--- a **499,00 €** ---

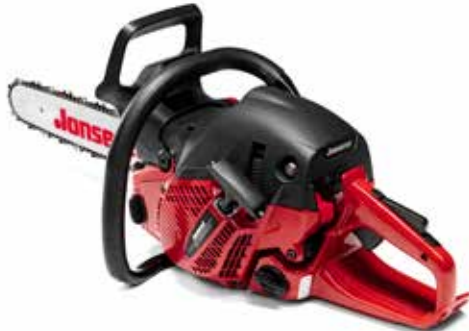

**JONSERED CS 2253**  
50,1 cc / 2,8 kW / 16" / 5,0 kg

listino ~~964,00 €~~ supervalutazione fino a **200 €**

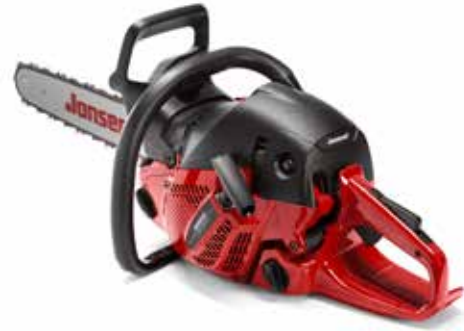

**JONSERED CS 2260**  
59,8 cc / 3,5 kW / 18"  
passo 325" / 5,6 kg

listino ~~1.171,00 €~~  
supervalutazione fino a **300 €**

**JONSERED CS 2260N**  
59,8 cc / 3,5 kW / 18"  
passo 3/8" / 5,6 kg

listino ~~1.171,00 €~~  
supervalutazione fino a **300 €**

PORTA LA TUA VECCHIA JONSERED E TI VERRÀ SUPERVALUTATO L'ACQUISTO DI UNA NUOVA MOTOSEGA JONSERED DELLA SERIE ULTICOR

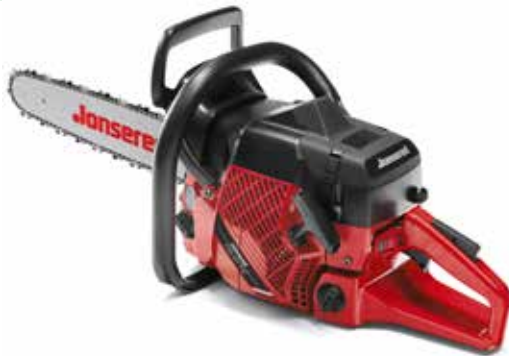

**JONSERED CS 2166**  
70,7 cc / 3,6 kW / 20" / 6,4 kg

a **699,00 €**

**JONSERED CS 2172**  
70,7 cc / 4,1 kW / 20" / 6,4 kg

a **899,00 €**

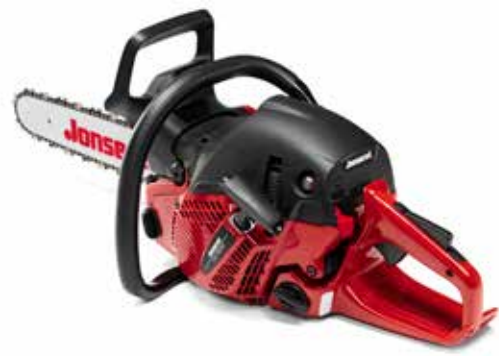

**JONSERED CS 2252**  
50,1 cc / 2,5 kW / 18" / 5,0 kg

a **599,00 €**

**JONSERED CS 2258**  
59,8 cc / 3,1 kW / 18" / 5,6 kg

a **699,00 €**

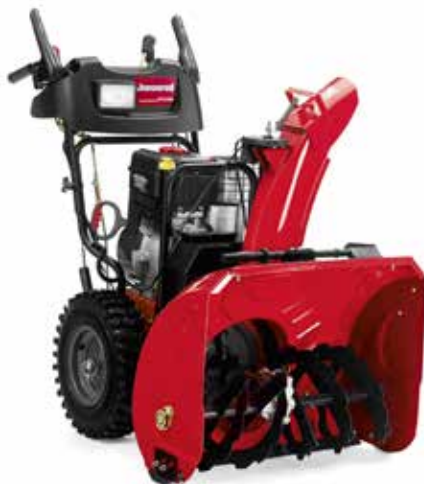

**JONSERED  
ST 2376 EP**

Motore LCT,  
7,2 kW / 3600 rpm  
larghezza di lavoro 76 cm

a **2.199,00 €**

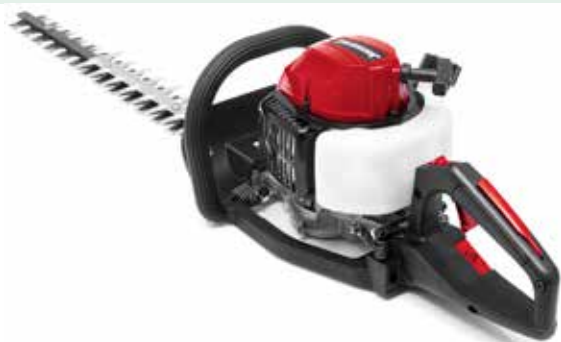

**JONSERED HT 2224 T**

22,5 cc / 0,6 kW / 5,5 kg  
lama doppia 60 cm

--- a **429,00 €** ---

**JONSERED HT 2230 T**

22,5 cc / 0,6 kW / 5,8 kg  
lama doppia 75 cm

--- a **469,00 €** ---

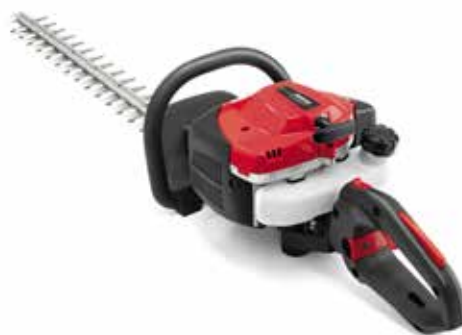

**JONSERED HT 2223 T**

21,7 cc / 0,6 kW / 4,9 kg / lama doppia 59 cm

--- a **329,00 €** ---

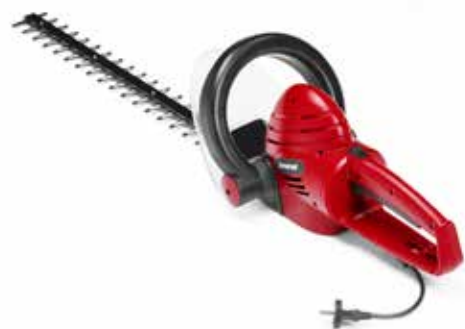

**JONSERED HT 2105 E**

0,6 kW / 3,3 kg  
lama doppia 56 cm

--- a **159,00 €** ---

**JONSERED HT 2106 ET**

0,7 kW / 3,6 kg  
lama doppia 60 cm

--- a **199,00 €** ---

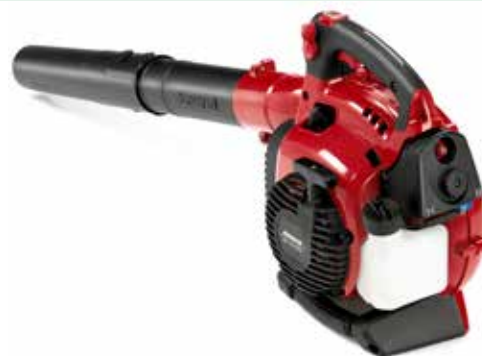

**JONSERED B 2126**

28,0 cc / 0,8 kW / 4,3 kg  
Velocità aria 58 m/s / Cruise control / Primer

--- a **259,00 €** ---

**JONSERED BV 2126**

28,0 cc / 0,8 kW / 4,4 kg / Velocità aria 58 m/s  
Spin Start™ / Cruise Control / Primer / Vac Kit /  
Triturazione / Impugnatura confort

--- a **309,00 €** ---

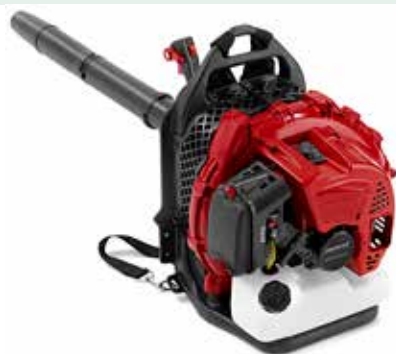

**JONSERED BB 2250**

50,2 cc / 1,6 kW / 10,1 kg / Velocità aria 85 m/s  
Vac Kit / Triturazione / Impugnatura confort

--- a **539,00 €** ---

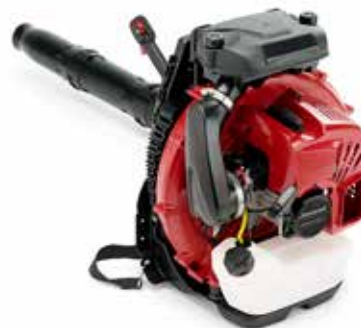

**JONSERED BB 2280**

75,6 cc / 3,3 kW / 11,2 kg / Velocità aria 92 m/s  
Cruise Control / Primer / Impugnatura confort

--- a **669,00 €** ---

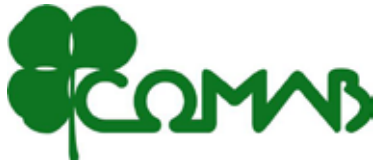

# OFFERTE ACCESSORI E PROTEZIONI

**Jonsered**<sup>®</sup>  
A WORKING LIFE<sup>™</sup>

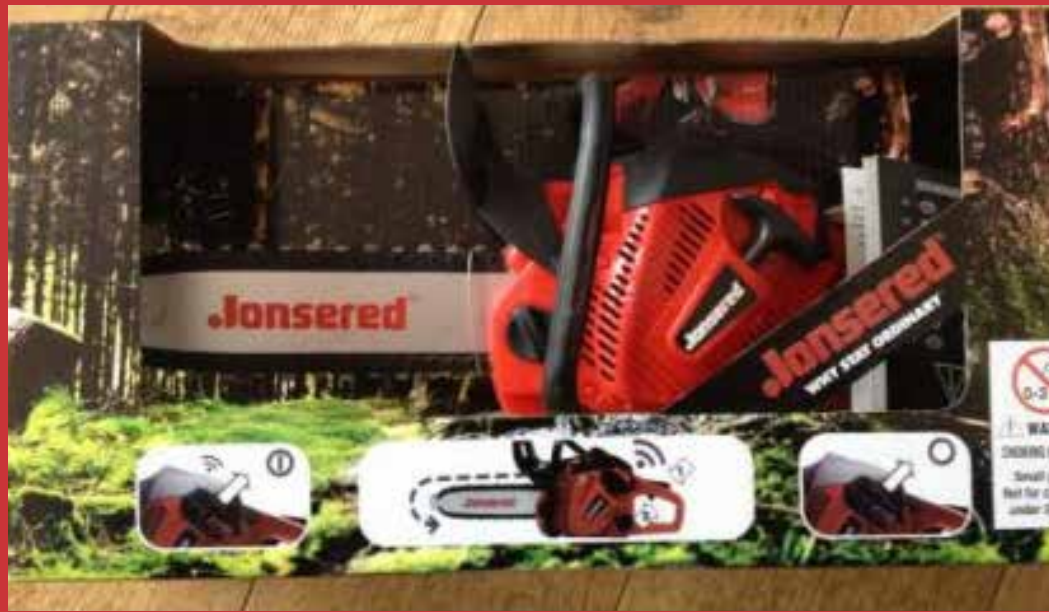

## JONSERED MOTOSEGA GIOCATTOLO

La prima Jonsered  
dei nostri piccoli boscaioli!

--- a **29,00 €** ---

Cappellino Jonsered  
"A working Life" in omaggio!

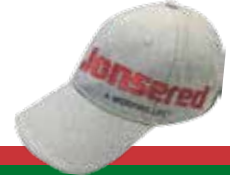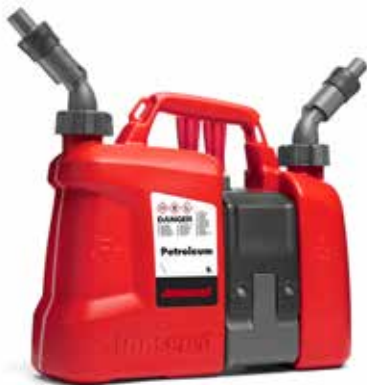

### JONSERED TANICA COMBI

Una tanica che consente di evitare traboccamenti  
e un riempimento eccessivo.

Contenitori separati per il carburante e l'olio della  
catena, oltre che compartimenti doppi per attrezzi  
e piccoli pezzi di ricambio. Per 5 litri di benzina e  
2,5 litri di olio per catene.

--- a **38,00 €** ---

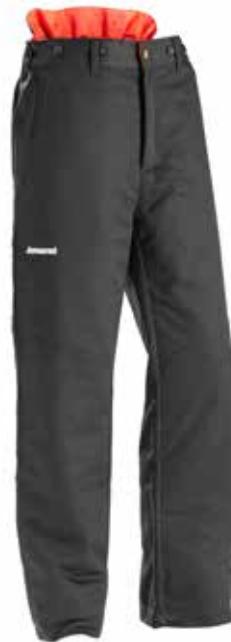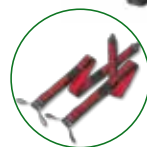

**BRETELLE JONSERED  
CON OCCHIELLI  
IN OMAGGIO**

### JONSERED PANTALONE PROTETTIVO ANTITAGLIO BASIC 20A

Pantalone protettivo con protezione antitaglio  
classe 1 (20 m/s),  
in resistente poliestere e cotone.

--- a **99,00 €** ---

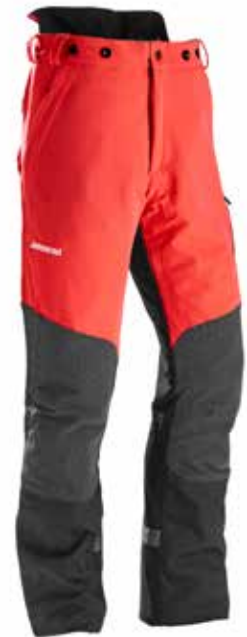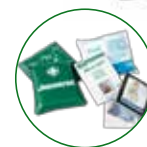

**KIT PRIMO SOCCORSO  
JONSERED  
IN OMAGGIO**

### JONSERED PANTALONE PROTETTIVO ANTITAGLIO STRETCH 20A

Pantalone protettivo antitaglio classe 1 (20  
m/s) con vestibilità slim e materiali stretch a 4 vie  
per confort e caratteristiche ergonomiche superiori.

--- a **249,00 €** ---

**COMAB Soc. Coop. Agr.**

Via Santellone, 37 - Montichiari (BS) - Tel. 030/9981302 - Fax 030/9981195 - [www.comabcoop.it](http://www.comabcoop.it)

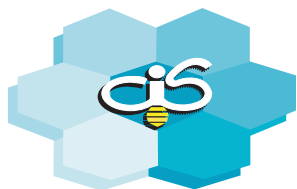

# USATO DEL SOCIO

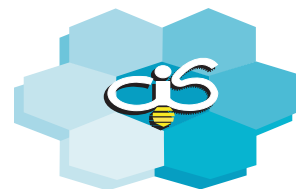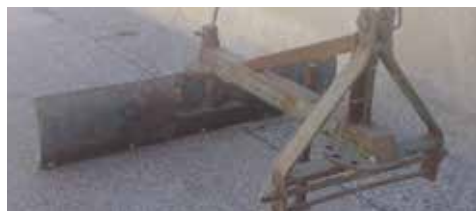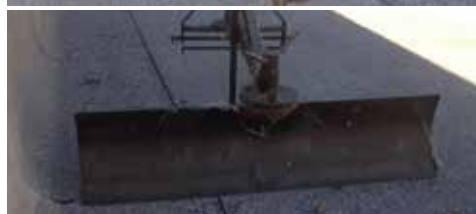

## TRAINA A SOLLEVAMENTO

misure 2 metri di larghezza per 0,5 di altezza.

a **200 €**  
iva esclusa

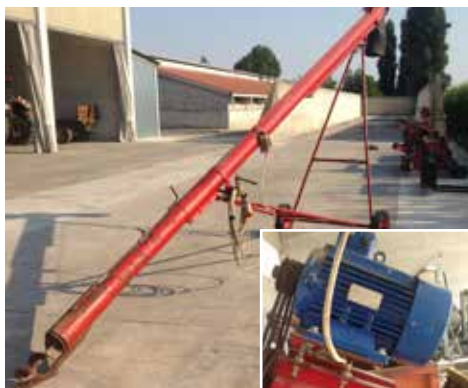

## COCLEA PER CEREALI

lunghezza 6 mt. Diametro 150. Motore 7,5 cv, con cavo corrente lungo 10 mt. Carrellata.

a **1.100 €** iva esclusa

Contatta Chiappini di Lograto (BS) Tel. 338/3682399

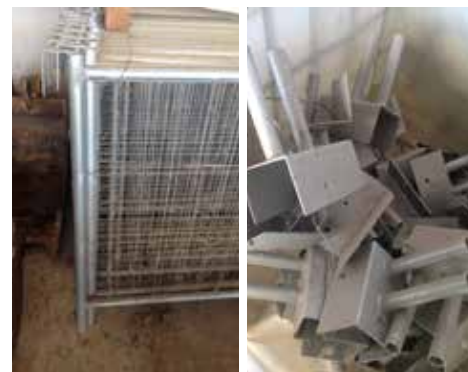

## RIPARI PER TRINCEA

Altezza 1 metro, lunghezza 3,30 metri per un totale di circa 120 metri, con appositi supporti da fissare alla trincea per poter mettere e togliere i ripari... tutti zincati.

a **1.300 €**  
iva esclusa

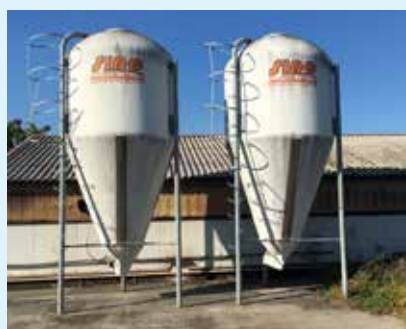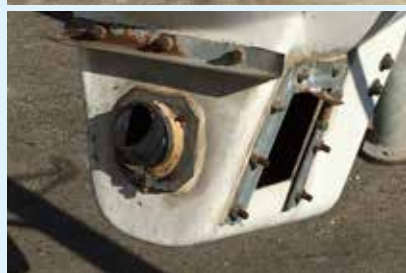

## 3 SILOS

da 60 q.li l'uno  
Bicelli Angelo  
di Montichiari (BS)  
Tel. 3313094348

Prezzo su  
richiesta

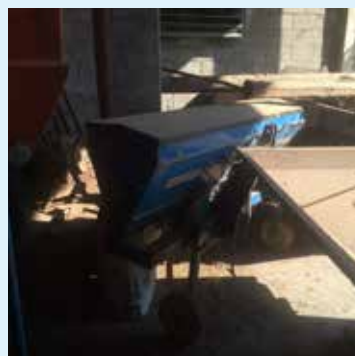

## Spandiconcime IPPOMEI

per mais, 3 file, usata solo 2 volte  
Sola Angelo di Montichiari (BS)  
Tel. 030964324

a **1.000 €**

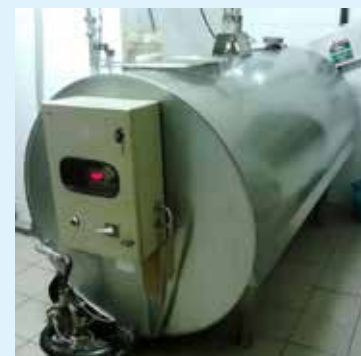

## FRIGO LATTE

capacità 21 q.li  
a ONETA (BG) di Grassenis D.  
Tel. 340/7260032

a **4.000 €**

prezzo trattabile

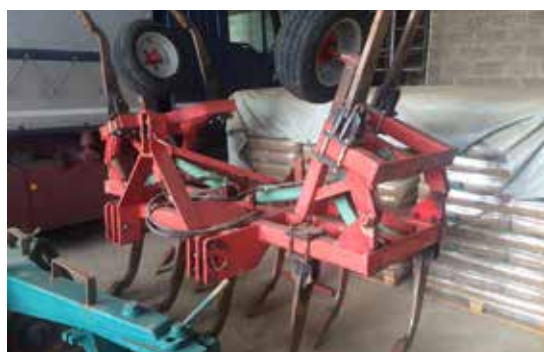

## RIPUNTATORE

3.5 mt pieghevole  
Bruno Corniani di Olmeneta (CR)  
3389355184

a **2.500 €**

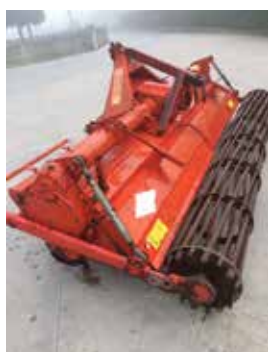

## FRESA KUHN

Larghezza lavoro 3 mt  
Bruno Corniani di Olmeneta (CR)  
3389355184

a **2.300 €** trattabili

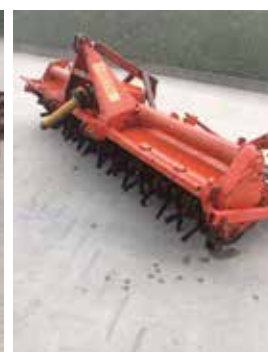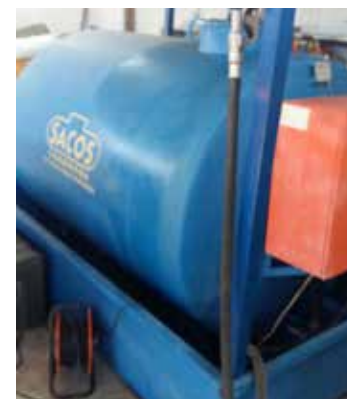

CISTERNA USATA da 3.000 lt  
Sig. CATTIVELLI MARCO  
Tel. 3358390933 a Saliceto di Cadeo  
(PC)

a **1.000 €** + IVA

SEZIONE GRATUITA PER TUTTI I SOCI DEL GRUPPO CIS (AGRICAM, COMAB, COMAZOO E COMISAG)  
PER INSERIRE L'ANNUNCIO MANDARE FOTO E INFO ALLA MAIL PUCCI@AGRICAM.IT



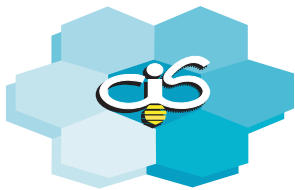

# USATO DEL SOCIO

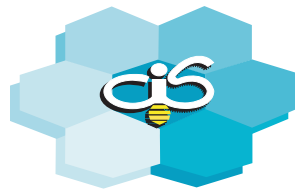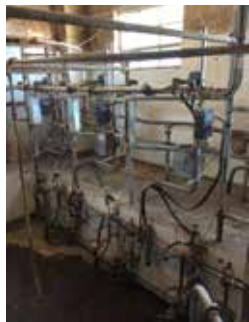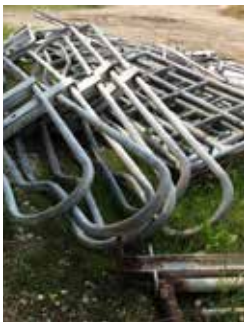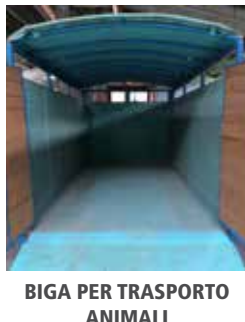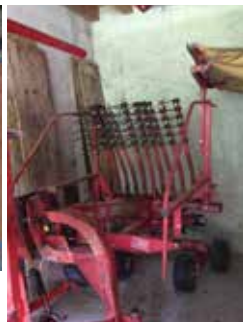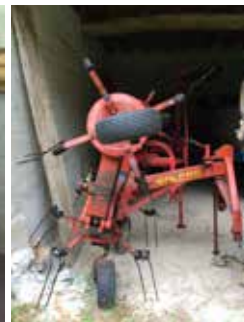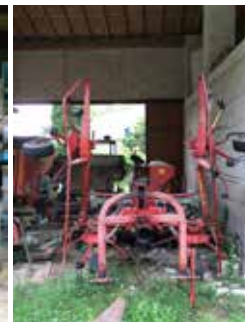

**SALA MUNGITURA 3+3**  
Marca WESTFALIA, spina di pesce, con stacchi automatici, pulsatori elettronici.

--- a **3.000 € + IVA** ---

**N. 10 CANCELLI**  
telescopici zincati per box animali + n. 12 BANDIERE doppie, zincate, per cuccette.

--- Prezzo da concordare, visibili senza impegno. ---

**BIGA PER TRASPORTO ANIMALI**

Rimessa tutta a nuovo e poi non utilizzata a causa vendita animali; capacità 5 vacche, telaio in ferro verniciato a nuovo, tutta in legno larice nuovo, rivestita a tenuta stagna, con cassetta raccolta urine nuova, cancelli laterali al ponte di salita, predisposta per autorizzazione Asl, non omologata. Da vedere, senza impegno.

--- a **2.500 €** ---

**GIROANDANATORE**  
10 braccia, assale tandem, completo di cardano. Anno 2002. Prezzo da concordare, visibili senza impegno

--- a **1.750 €** ---

**GIRELLO COMPLETO DI CARDANO**  
Prezzo da concordare, visibili senza impegno

--- a **1.500 €** ---

**GIRELLO IDRAULICO**  
Completo di cardano, usato poco. Anno 2002. Prezzo da concordare, visibili senza impegno

--- a **2.300 €** ---

A Cavriana (MN) - Ennio - Tel. 3396869336 o 3392323276

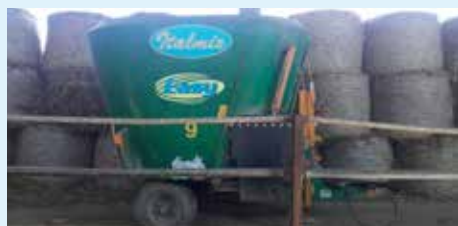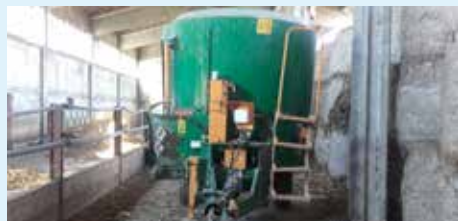

**Carro Unifeed trainato verticale**  
marca Italmix - Anno 2013 da 9 m<sup>3</sup>  
Garatti di Ostiano - Tel. 037256129

--- a **6.000 €** trattabili ---

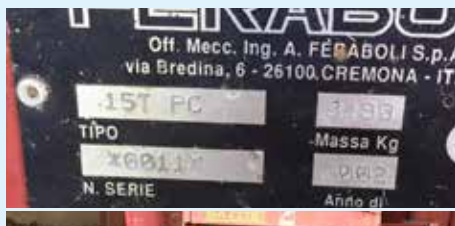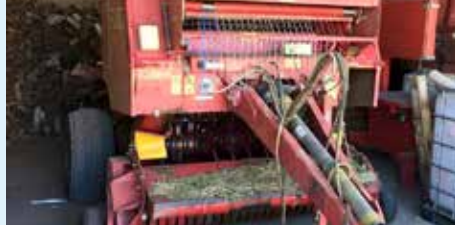

**ROTOPRESSA FERABOLI TROTTER TOPCUT**

Pezzaioi O. di Montichiari (BS)  
Tel. 3396438369

--- a **7.000 €** ---

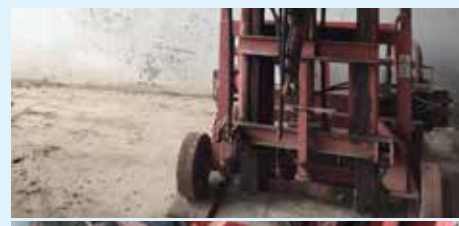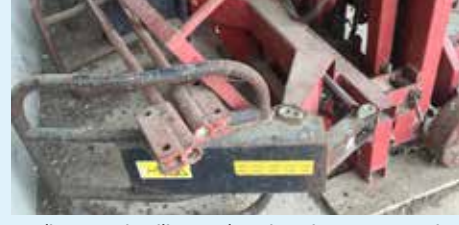

Vendita causa inutilizzo muletto in ottimo stato con pinza e punte intercambiabili e provvisto di pistone idraulico.

Diego di Carpenedolo (BS)  
Tel. 3281842861

--- a **1.500 €** ---

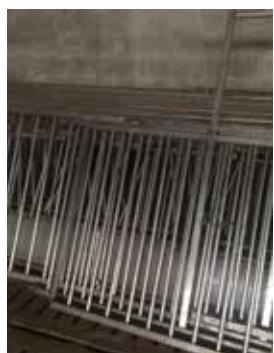

**ULTIMI BOX IN ACCIAIO INOX**

Alto 1.20mt largo circa 3 mt

--- a **1.40 €/kg** ---

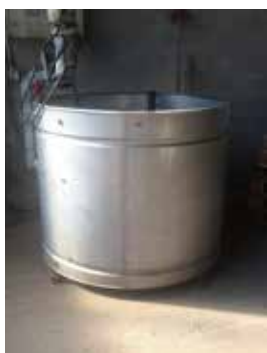

**MISCELATORE**

in acciaio inox per il latte da 1200lt

--- a **500 €** ---

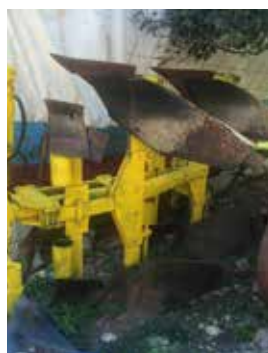

**ARATRO MIPRA BIVOMERO**

11 q.li

--- a **800 €** ---

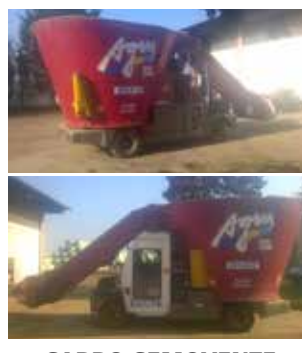

**CARRO SEMOVENTE AGM 20M<sup>3</sup>**

Anno 1999, acquistato a settembre 2013 con circa 10000 h. Ore attuali 14900. Macchina funzionante! Vendo per cambio macchina con maggior volume.

A Mamirolo (MN) - Tel. 344 0249348

--- a **17.000 €** ---

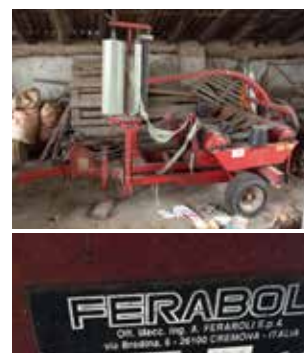

**FASCIATORE FERABOLI**

A Besana Brianza (MI)  
VILLA - tel. 339 1178511

--- a **2.000 €** ---

Sola Pietro di Montichiari (BS) - Tel. 347/4484197

## IL PASSAGGIO GENERAZIONALE IN AZIENDA

di Marco Treccani

Il passaggio generazionale ed in generale la successione aziendale sono tematiche che coinvolgono tutte le aziende a conduzione familiare; tale particolare momento della vita aziendale si caratterizza per il trasferimento da una generazione all'altra del Know-how ("sapere") aziendale, delle conoscenze e competenze direzionali/organizzative di gestione d'azienda. In considerazione dell'orizzonte temporale d'intervento, che risulta essere di medio-lungo periodo, l'unico approccio professionale efficace, sarà quindi quello di pianificare un percorso d'azione, che stabilisca strategie e stili di leadership ("direzione") manageriale che si occupino del necessario adeguamento della struttura organizzativa aziendale.

L'imprenditore di prima generazione è normalmente un imprenditore che è nato dal nulla che ha saputo utilizzare le proprie abilità, le proprie attitudini e, con intuizione e propensione al rischio, ha iniziato la sua attività e l'ha fatta crescere.

L'introduzione dei figli ed il proseguimento in un'azienda sorta sulla

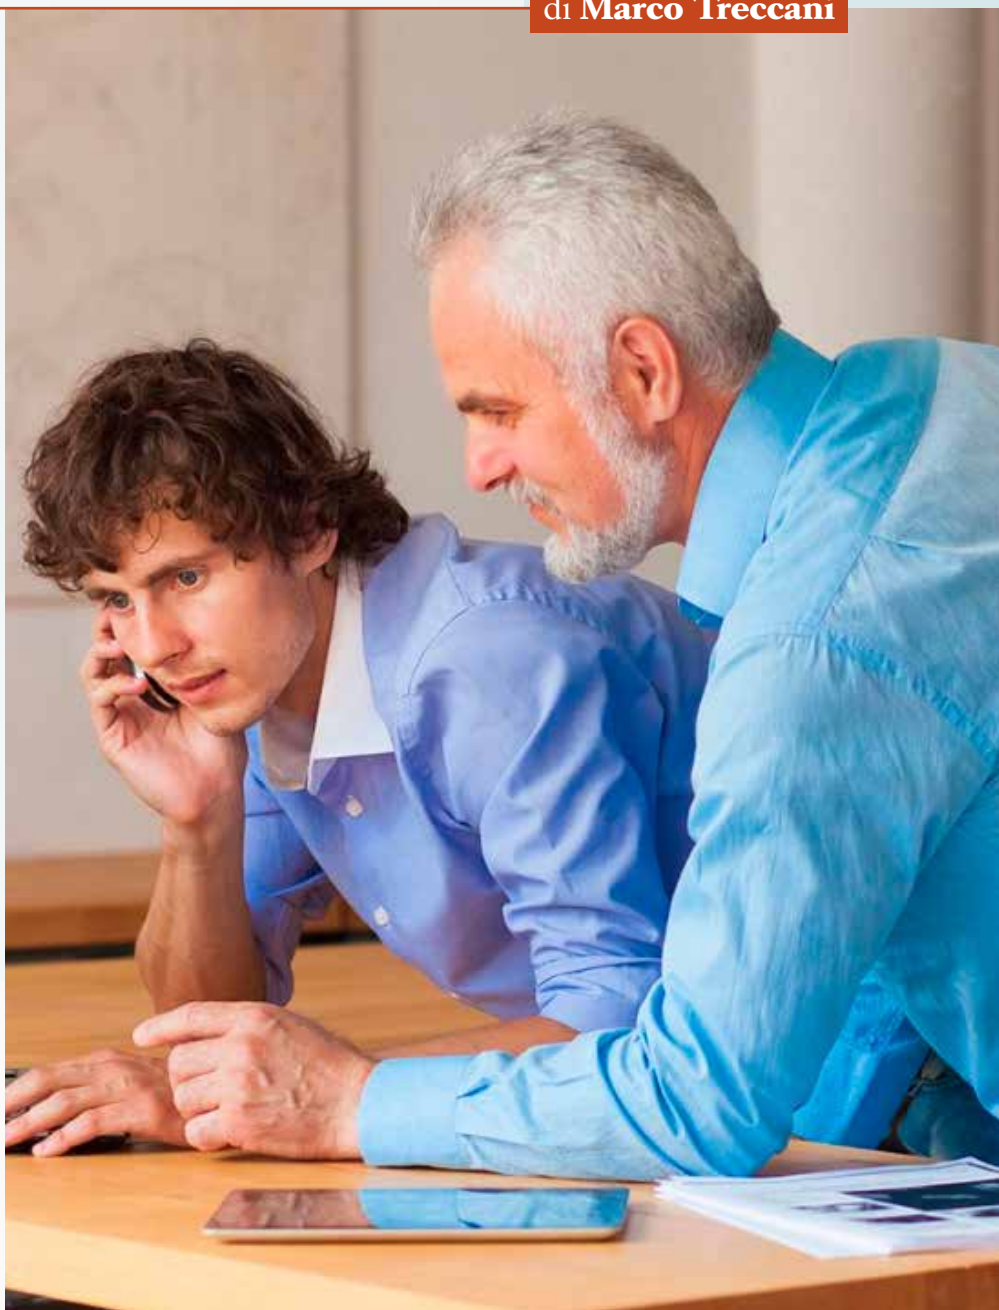

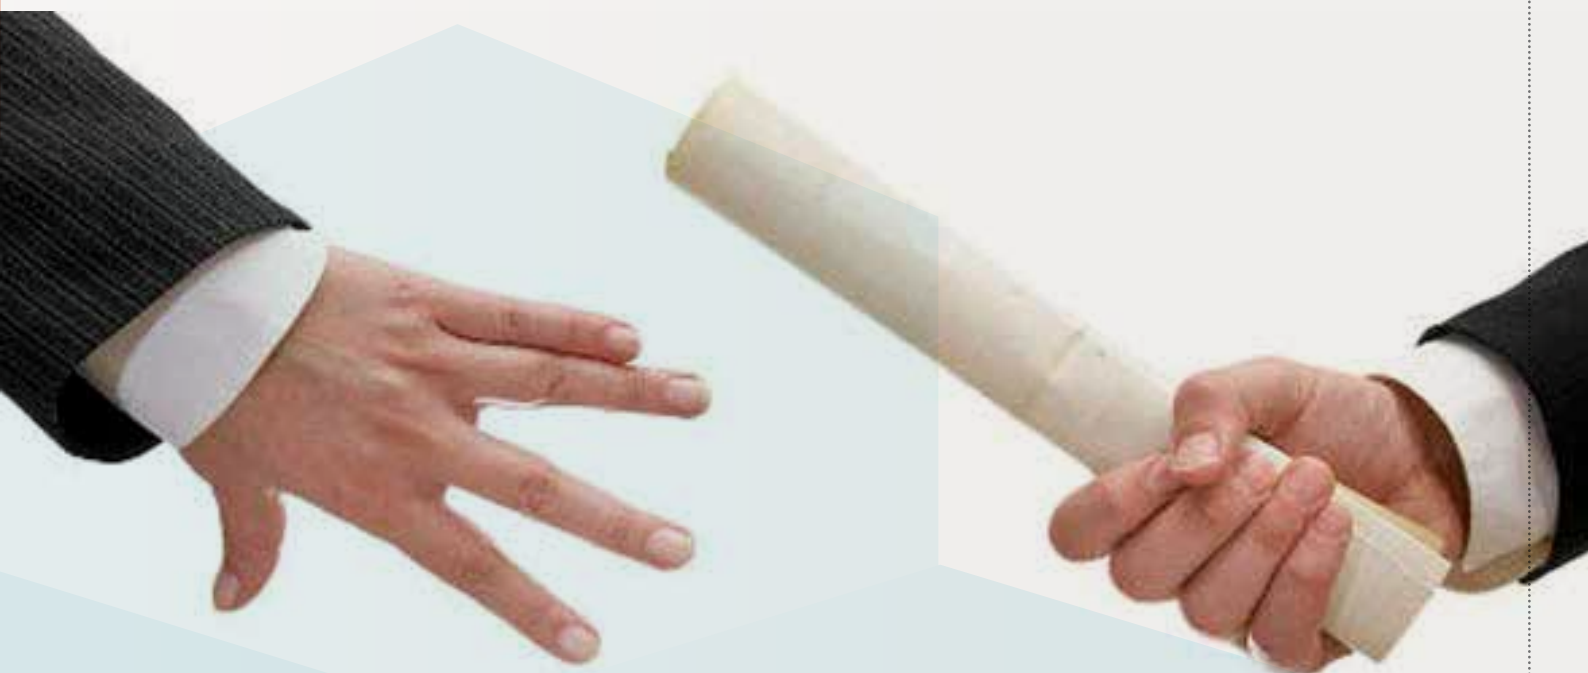

personalità di “capi carismatici”, diventa una delle problematiche principali in quanto la gestione personalistica del Know-how e la mancata propensione alla delega, fa sì che il passaggio generazionale diventi un notevole ostacolo di crescita che va gestito nel modo più opportuno.

I figli spesso non sono solo pensati per l'azienda, ma generati per l'azienda, e soffrono tutta l'urgenza dei genitori nel vederli entrare in azienda e di essere prosecutori del fondatore, e questo con modalità che possono essere fortemente criticate.

Infatti, mentre il padre che ha generato l'azienda, l'ha fatta crescere attorno alla propria imprenditorialità, il figlio dovrebbe poter scoprire se questo ambito coincide con il proprio progetto personale, se ha nelle proprie corde le capacità imprenditoriali necessarie per poter condurre l'azienda di famiglia.

Naturalmente oggi, più che in passato, è necessario analizzare quali sono le possibili ragioni per continuare o cessare l'attività dei genitori o comunque dei propri parenti prossimi. **La componente più importante è il reddito che l'azienda familiare può fornire** in comparazione a quello offerto da altre occupazioni. Se quindi per i giovani figli di agricoltori il reddito derivante dalla continuazione dell'attività familiare è importante, sono però altrettanto importanti le occupazioni alternative. È chiaro che comunque possono influire sulle scelte anche le preferenze personali in termini di avversione al rischio, oltre che le prospettive offerte dal mercato del lavoro locale.

**Quella che comunque deve proseguire nel proprio cammino, è l'azienda che passa di mano, che dovrà evolvere**

secondo nuovi indirizzi e strategie, con l'introduzione di nuove idee, tecnologie, e con l'ampliamento possibilmente a nuovi mercati.

Per questi motivi i figli dovrebbero essere più formati dei padri, tecnicamente più pronti, magari aver maturato esperienze in altre realtà, per poi essere in grado di prendersi in carico l'azienda di famiglia. Pertanto, appare evidente che il valore primario nella fase di trasmissione generazionale risulti essere “la competenza professionale” che garantisce il mantenimento dell'efficienza aziendale supportata dallo sviluppo tecnologico e dal fattore umano.

Una competenza professionale, intesa come specifica qualità del nostro agricoltore, permetterà allo stesso di combinare diverse risorse e gestire o affrontare in maniera efficace diverse situazioni. Accanto quindi alla formazione tecnica dovrà esser dato maggior spazio alle conoscenze connesse al nuovo ruolo multifunzionale dell'agricoltura: da quella ambientali a quelle relative alla valorizzazione delle risorse locali e della tipicità dei prodotti, comprese nozioni di marketing e l'uso degli strumenti informatici e di internet.

La maggiore apertura dei giovani verso questo tipo di tematiche potrebbe già essere una garanzia della loro maggiore partecipazione. Ne consegue che una alta professionalità costituisce una fonte di soddisfazione ed un incentivo alla permanenza in agricoltura.

Da ultimo e sicuramente non meno importante, **l'indispensabile riflessione alla qualità della vita**, sia per chi si approssima al congedo lavorativo sia per chi, per effetto dello stesso, è ai blocchi di partenza. Ad ognuno la propria...

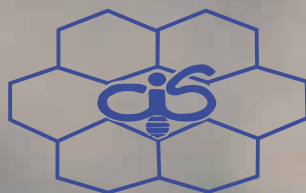

# CENA DI *Natale* CIS

## SABATO 17 DICEMBRE 2016

- 17.00 Arrivo ospiti  
17.30 Santa Messa  
18.30 “Voci della cooperazione del territorio: esperienze  
persone e servizi per noi agricoltori e le nostre famiglie”  
Coordina: Paolo Foglietti Vice Presidente di Confcooperative Brescia  
Sono stati invitati: Marco Menni Presidente di Confcooperative Brescia  
Fabio Perini Presidente di Fedagri Lombardia  
20.00 Cena con “I bolliti d’inverno”  
21.30 Spettacolo comico con “Andrea Catavolo Show”  
22.30 Ballo liscio con orchestra “Ruggero Scandiuzzi”

LA FESTA SI SVOLGERÀ PRESSO  
LA SEDE DELLA COOP. AGRICAM  
VIA BORNATE, 1 - MONTICHIARI (BS)

**AREA ATTREZZATA BIMBI  
CON GIOCHI GONFIABILI E  
ANIMAZIONE**
