# Supplementary material
Source: MDPI journal article supplement (https://www.mdpi.com/2624-7402/6/1/36)
Supplement: s1 [file s1]

Notes

|                |                       |
|----------------|-----------------------|
| Description    | Perform One-Way ANOVA |
| User Name      | valin                 |
| Operation Time | 03/12/2023 15:32:18   |
| Report Status  | New Analysis Report   |
| Data Filter    | No                    |

Input Data

|                    | Data                                | Range    |
|--------------------|-------------------------------------|----------|
| Dependent Variable | [Book1]Sheet1!F"Hardness Shore A"   | [1*:81*] |
| Factor "           | [Book1]Sheet1!C"Binder fraction (%w | [1*:81*] |

Descriptive Statistics

|   | N Analysis | N Missing | Mean     | Standard Deviation | SE of Mean |
|---|------------|-----------|----------|--------------------|------------|
| 5 | 27         | 0         | 38,97667 | 6,16054            | 1,1856     |
| 6 | 9          | 0         | 42       | 1,35434            | 0,45145    |
| 7 | 36         | 0         | 41,17417 | 4,25303            | 0,70884    |
| 8 | 9          | 0         | 41,2     | 1,5138             | 0,5046     |

ANOVA

Overall ANOVA

|       | DF | Sum of Squares | Mean Square | F Value | Prob>F  |
|-------|----|----------------|-------------|---------|---------|
| Model | 3  | 103,57001      | 34,52334    | 1,60831 | 0,19432 |
| Error | 77 | 1652,85507     | 21,46565    |         |         |
| Total | 80 | 1756,42509     |             |         |         |

Null Hypothesis: The means of all levels are equal.

Alternative Hypothesis: The means of one or more levels are different.

At the 0.05 level, the population means are not significantly different.

Fit Statistics

|  | R-Square | Coeff Var | Root MSE | Data Mean |
|--|----------|-----------|----------|-----------|
|  | 0,05897  | 0,1143    | 4,6331   | 40,5363   |

Means Comparisons

Tukey Test

|     | MeanDiff | SEM     | q Value | Prob    | Alpha | Sig | LCL      | UCL     |
|-----|----------|---------|---------|---------|-------|-----|----------|---------|
| 6 5 | 3,02333  | 1,78328 | 2,39762 | 0,33314 | 0,05  | 0   | -1,65963 | 7,7063  |
| 7 5 | 2,1975   | 1,17953 | 2,63472 | 0,25253 | 0,05  | 0   | -0,89999 | 5,29499 |
| 7 6 | -0,82583 | 1,72666 | 0,6764  | 0,96367 | 0,05  | 0   | -5,36009 | 3,70843 |
| 8 5 | 2,22333  | 1,78328 | 1,76319 | 0,59931 | 0,05  | 0   | -2,45963 | 6,9063  |
| 8 6 | -0,8     | 2,18407 | 0,51801 | 0,98308 | 0,05  | 0   | -6,53543 | 4,93543 |
| 8 7 | 0,02583  | 1,72666 | 0,02116 | 1       | 0,05  | 0   | -4,50843 | 4,56009 |

Grouping Letters Table

Tukey Test

|   | Mean     | Groups |
|---|----------|--------|
| 6 | 42       | A      |
| 8 | 41,2     | A      |
| 7 | 41,17417 | A      |
| 5 | 38,97667 | A      |

Means that do not share a letter are significantly different.

Sig equals 1 indicates that the difference of the means is significant at the 0,05 level.

Sig equals 0 indicates that the difference of the means is not significant at the 0,05 level.

Homogeneity of Variance Test

Powers

|              | Alpha | Sample Size | Power   |
|--------------|-------|-------------|---------|
| Actual Power | 0,05  | 81          | 0,40709 |
